# Supplementary material for: Synthesizing theories of human language with Bayesian program induction
Source: PubMed Central journal article supplement (PMC9427767; doi:10.1038/s41467-022-32012-w), 2022-08-30
Supplement: 41467_2022_32012_MOESM1_ESM.pdf [file 41467_2022_32012_MOESM1_ESM.pdf]

# Supplementary Information for: Synthesizing Theories of Human Language with Bayesian Program Induction

Kevin Ellis\*, Adam Albright, Armando Solar-Lezama, Joshua B. Tenenbaum, Timothy J. O’Donnell

\*: To whom correspondence should be addressed. E-mail: kellis@cornell.edu

## Contents

|                                                           |           |
|-----------------------------------------------------------|-----------|
| <b>S1 Supplemental Discussion: Linguistic Formalism</b>   | <b>1</b>  |
| <b>S2 Supplemental Figures</b>                            | <b>2</b>  |
| S2.1 Textbook problems . . . . .                          | 2         |
| S2.2 Artificial grammar learning . . . . .                | 2         |
| S2.3 Learned Fragment-Grammar meta-model . . . . .        | 2         |
| <b>S3 Supplemental Methods</b>                            | <b>9</b>  |
| S3.1 Input data format . . . . .                          | 9         |
| S3.2 Counter-Example Guided Inductive Synthesis . . . . . | 9         |
| S3.3 Incremental synthesis of grammars . . . . .          | 9         |
| S3.4 Bayesian prior over grammars . . . . .               | 11        |
| S3.5 Ablation studies . . . . .                           | 12        |
| <b>S4 Full set of problems and model outputs</b>          | <b>12</b> |

## S1 Supplemental Discussion: Linguistic Formalism

**Surface and underlying forms.** The final pronounced form of a word is referred to as its *surface form*, conventionally written between brackets, while intermediate forms such as entries in the lexicon are called *underlying forms* and are written between slashes. For example, the English past tense of the word walk (i.e. “walked”) has the surface form [wɔkt], but the underlying form /wɔkd/, which is built from the underlying form of the past tense (i.e. /d/) and the underlying form of the stem for walk (i.e. /wɔk/). In the main text we have adopted a simplified presentation where all (sequences of) phonemes are written between slashes.

**Morphosyntax.** In modern linguistic theories, the mapping between form and meaning is assumed to be mediated by a central component called (*morpho*)*syntax* which contains information about the category of constituents and how they combine. Thus, each linguistic constituent is described by a form-category-meaning triple  $\langle f, c, m \rangle$ . In the present work, these components consist of:

1. **Form:** A specification of the sound structure of the constituent. In this work, we will use sequences of phonemes described as phonetic feature vectors. For example, the English (EN) past tense verb form *walked* is represented as [wɔkt]. This complex constituent consists of two smaller pieces, the past tense suffix which is represented underlyingly as /d/ and the stem /wɔk/.
2. **Morphosyntactic Category:** A specification of the category of the constituent and how it combines with other constituents. The category of *walked* is verb V. The past tense marker /d/ has category  $V \setminus V$  meaning that it must attach to a verb stem on its left to produce a verb. Analogously, a morpheme that is prefixed (e.g., ‘re-’, as in ‘reanalyze’, ‘redo’, ...) would have the morphosyntactic category  $V/V$ . In the main text, we used the more intuitive, less formal markers **px**, **stem**, **sfx** for  $V/V$ ,  $V$ ,  $V \setminus V$ , respectively.

3. **Meaning:** A specification of the meaning. In this work, we assume meanings are just sets of atomic meaning features. So the meaning of *walked* is **[stem:WALK;tense:PAST]**. The meaning of the past tense marker /d/ is **[tense:PAST]** and the meaning of the stem *walk* is **[stem:WALK]**.

Thus, *walked* will be represented as  $\langle [w\acute{o}k], \mathbf{V}, [\mathbf{stem:WALK}; \mathbf{tense:PAST}] \rangle$ . A grammar  $\mathbf{G}$  can be thought of as a joint distribution on the set  $X$  of form-category-meaning triples:  $\langle f, c, m \rangle \in X$  and is specified by four components  $\mathbf{G} = \langle \mathbf{L}, \mathbb{S}, (\cdot), [\cdot] \rangle$ .<sup>1</sup> First, there is a stored collection of primitive or atomic units known as the lexicon  $\mathbf{L}$ . Each lexical item is also a form-category-meaning triple. Lexical items are assembled into more complex structures using an inventory of structure building operations  $\mathbb{S}$ . In our model,  $\mathbb{S}$  corresponds to concatenation of morphemes. Finally, assembled morphosyntactic structures are mapped to surface sound and meaning representations by a pair of functions called *interface mappings* which take syntactic objects to sound structure  $(\cdot)$  (*phonology*) and meaning structure  $[\cdot]$  (*semantics*) respectively.

For example, in English, the stem for the verb *walk* is  $\langle /w\acute{o}k/, \mathbf{V}, [\mathbf{stem:WALK}] \rangle \in \mathbf{L}_{\text{EN}}$ . In our model, we adopt a single structure-building operation  $\sigma(\cdot, \cdot)$  that operates on pairs of constituents concatenating their form parts, algebraically canceling their category parts, and performing unification on their meaning. For example, in English the past tense is marked regularly by the lexical item  $\langle /d/, \mathbf{V} \setminus \mathbf{V}, [\mathbf{tense:PAST}] \rangle$ . So the past tense form *walked* can be constructed as

$$\sigma(\langle /w\acute{o}k/, \mathbf{V}, [\mathbf{stem:WALK}] \rangle, \langle /d/, \mathbf{V} \setminus \mathbf{V}, [\mathbf{tense:PAST}] \rangle) = \langle [w\acute{o}kd], \mathbf{V}, [\mathbf{stem:WALK}; \mathbf{tense:PAST}] \rangle$$

Note that the output of  $\sigma$  represents the *underlying form* /w\acute{o}kd/—on the surface the final /d/ is devoiced in the context of the voiceless /k/; that is, it is pronounced [w\acute{o}kt]. The set of all possible underlying forms is simply the closure of the lexicon  $\mathbf{L}$  under  $\sigma$ . We write  $U_{\mathbf{L}}$  for the set of all underlying forms in a language with lexicon  $\mathbf{L}$ —that is, the set of all structures derivable from  $\mathbf{L}$  using  $\sigma$ .

The interface function  $(\cdot)$  is a set of ordered transduction (SPE-style) rules which map underlying to surface forms. In the present work, we leave  $[\cdot]$  as the identity function.

Using the formalism introduced above, the theory-induction objective corresponds to finding a set of phonological transduction rules  $(\cdot)$ , semantic transduction rule  $[\cdot]$  and lexicon  $\mathbf{L}$  maximizing

$$\left[ \prod_{x \in \mathbf{X}} \mathbb{1}[(\exists u) \mid u \in U_{\mathbf{L}} \wedge (u) = x.f \wedge [u] = x.m] \right] P(\mathbf{G} | \text{UG})$$

which is equivalent to Eq. 1 in the main paper.

## S2 Supplemental Figures

### S2.1 Textbook problems

Figure S1-S3 illustrates grammars learned for additional textbook problems.

### S2.2 Artificial grammar learning

Figure S4 shows learning curves for the model on artificial grammar learning experiments.

### S2.3 Learned Fragment-Grammar meta-model

Fig. S5 shows our basic context free grammar over SPE-style rewrites, which defines a space of possible programs for modelling phonological rules. In learning a meta-model, we build on top of this hand-coded basis. Specifically, we learn by adding more context-free production rules to this basic grammar. This works by learning additional commonly occurring fragments of rules (Fig. S6), which biases the model toward reusing those fragments.

<sup>1</sup>In the main paper we factor grammars into rules  $\mathbf{T}$  and lexicon,  $\mathbf{L}$ . This section combines these two factors into a single tuple, the grammar  $\mathbf{G}$ , and also incorporates morphosyntactic category information in the observed data, which we elided from the main text. Our system assumes every observed (form, meaning) pair has the same morphosyntactic category.

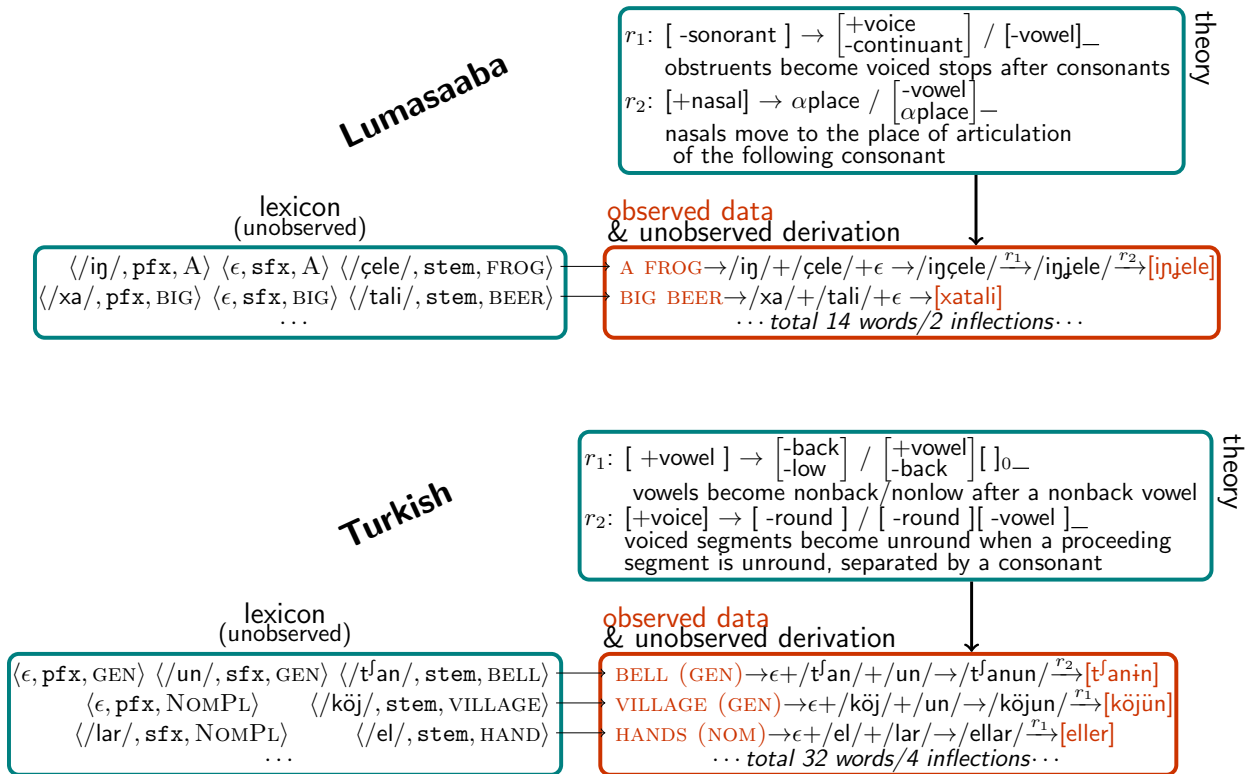

Figure S1: Given dataset, highlighted in orange, system jointly infers both language-specific phonological rules (“theory” box, labeled  $r_1$ ,  $r_2$ , etc.) and dataset-specific lexicon, which include both stems and affixes for each inflection. Together the theory and lexicon explain the orange data via a derivation where the morphology output (prefix+stem+suffix) is transformed according to the ordered rules. The symbol  $\epsilon$  means the empty string.

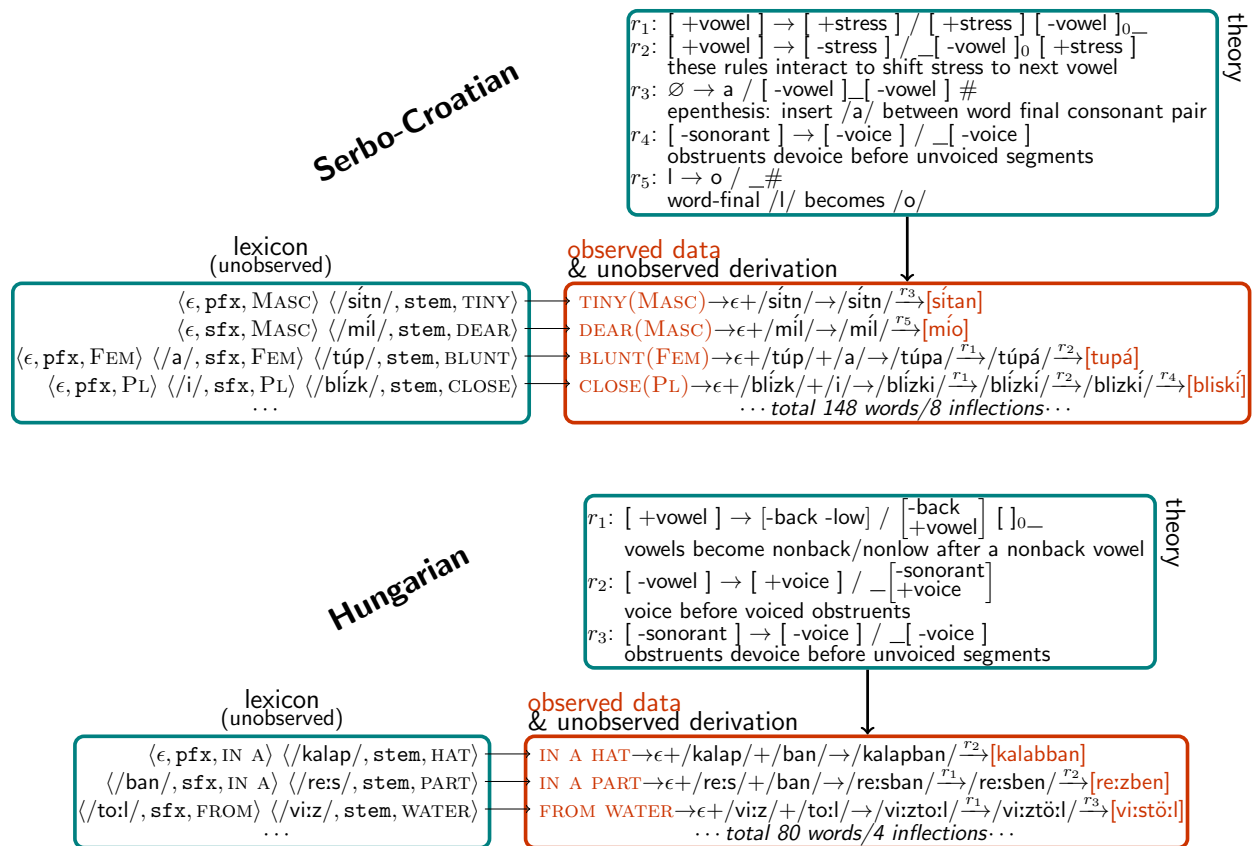

Figure S2: Given dataset, highlighted in orange, system jointly infers both language-specific phonological rules (“theory” box, labeled  $r_1$ ,  $r_2$ , etc.) and dataset-specific lexicon, which include both stems and affixes for each inflection. Together the theory and lexicon explain the orange data via a derivation where the morphology output (prefix+stem+suffix) is transformed according to the ordered rules. The symbol  $\epsilon$  means the empty string.

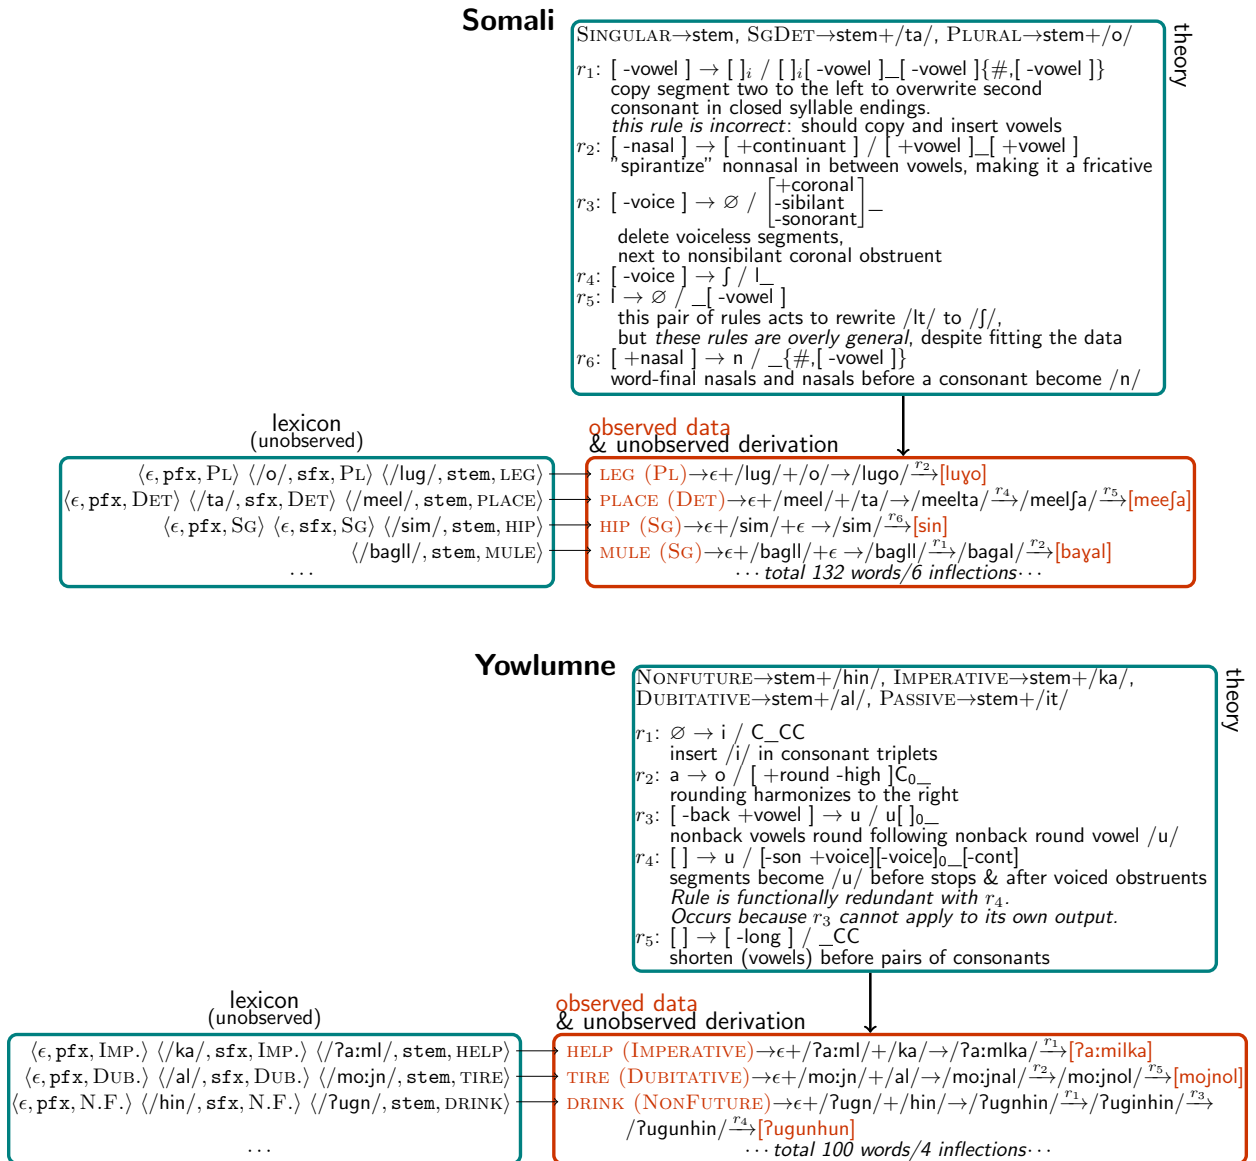

Figure S3: Example failure modes for our system; illustration is analogous to Fig. S1-S2. Somali rule system fails to explain 20% of the textbook problem, and many of the individual rules are implausible upon inspection, such as the first copying rule  $r_1$  — see the bottom of derivation of the singular form of “mule.” Other rules are essentially correct, such as the spirantization process implemented by rule  $r_2$ , or the neutralization process in  $r_6$ . Yowlumne rule system contains a redundant vowel rounding process,  $r_4$ , which acts in concert with  $r_3$  to repeatedly harmonize segments to /u/; see illustration of the derivation of the non-future form of DRINK (bottom of observed data/unobserved derivation box). (“Yowlumne” was formerly known as “Yawelmani” [1].)

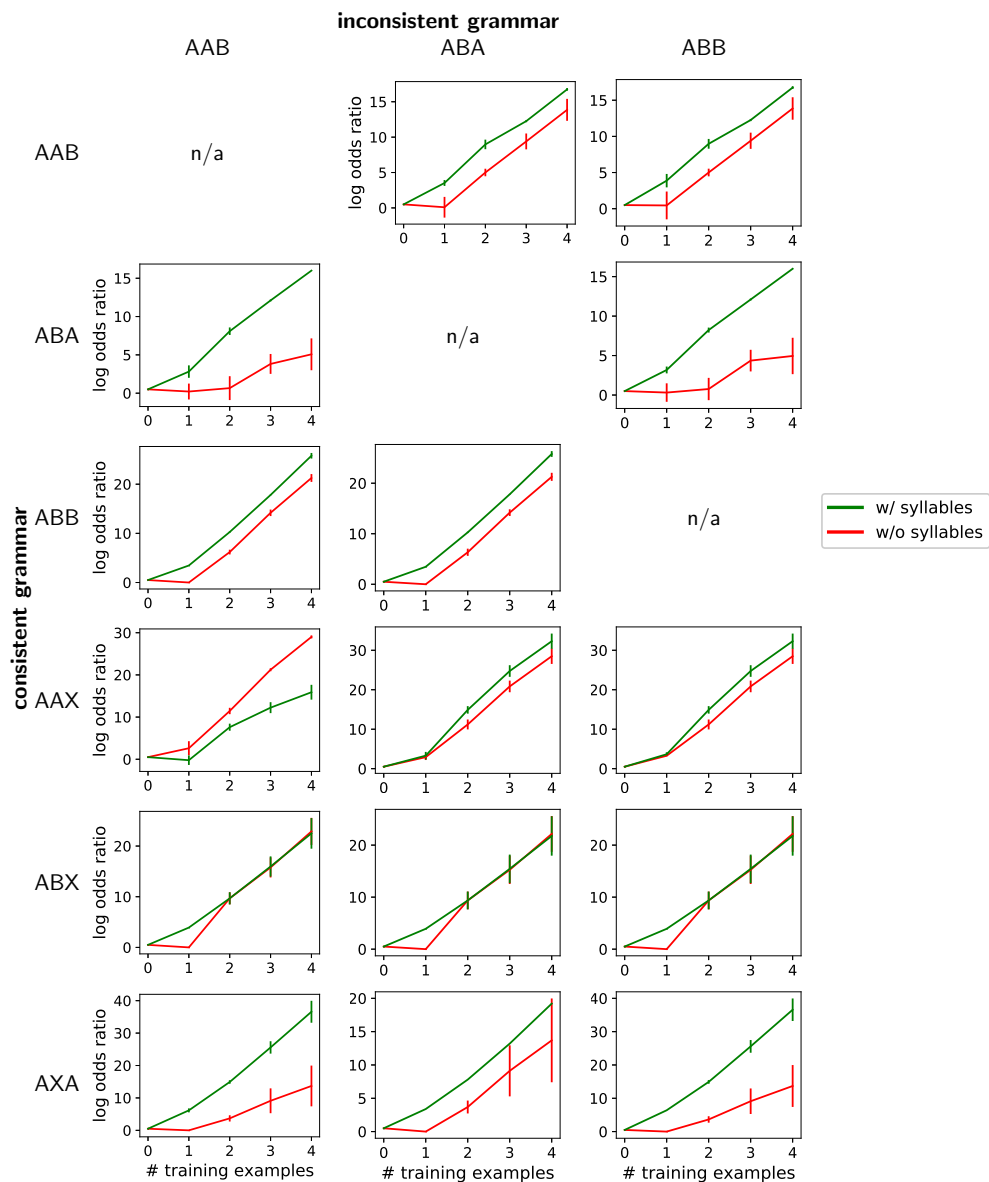

Figure S4: Learning curves artificial for grammar learning (compare with Fig. 6). The x-axis of each plot varies the number of training words, each drawn from the ‘consistent’ grammar. The y-axis of each plot compares the likelihood of test words from the consistent and inconsistent grammars according to the log odds ratio  $\log P(\text{consistent}|\text{train})/P(\text{inconsistent}|\text{train})$ . Values greater than 0 indicate successful discrimination between the consistent and inconsistent grammars. Curves show mean and standard deviation over  $n = 15$  random test word pairs conforming to the (in)consistent grammars. Green: w/ syllabic representation. Red: w/o syllabic representation. Source data are provided as a Source Data file.

| <i>Template for a single rule</i>                                                          |                                              |                                                        |
|--------------------------------------------------------------------------------------------|----------------------------------------------|--------------------------------------------------------|
| Rule ::=                                                                                   | Focus→Change / Trigger - Trigger             |                                                        |
| <i>Focus of rule, and what it can change into</i>                                          |                                              |                                                        |
| Focus ::=                                                                                  | $\emptyset$                                  | <i>insertion rule</i>                                  |
| Focus ::=                                                                                  | FeatureMatrix                                |                                                        |
| Change ::=                                                                                 | $\emptyset$                                  | <i>deletion rule</i>                                   |
| Change ::=                                                                                 | $\mathbb{Z}$                                 | <i>copying rule: an integer</i>                        |
| Change ::=                                                                                 | $\alpha$ place                               | <i>copy place from <math>\alpha</math>, an integer</i> |
| Change ::=                                                                                 | FeatureMatrix                                |                                                        |
| <i>Every triggering environment with at most two feature matrices</i>                      |                                              |                                                        |
| Trigger::=                                                                                 |                                              | <i>empty conditioning (triggering) environment</i>     |
| Trigger::=                                                                                 | FeatureMatrix                                | <i>a single feature matrix to the side of focus</i>    |
| Trigger::=                                                                                 | FeatureMatrix <sub>0</sub> FeatureMatrix     | <i>zero or more repeats of a feature matrix</i>        |
| Trigger::=                                                                                 | FeatureMatrix FeatureMatrix                  |                                                        |
| Trigger::=                                                                                 | #                                            | <i>end-of-string</i>                                   |
| Trigger::=                                                                                 | FeatureMatrix #                              |                                                        |
| Trigger::=                                                                                 | FeatureMatrix <sub>0</sub> FeatureMatrix #   |                                                        |
| Trigger::=                                                                                 | FeatureMatrix FeatureMatrix #                |                                                        |
| Trigger::=                                                                                 | {#,FeatureMatrix}                            | <i>end-of-string or a feature matrix</i>               |
| Trigger::=                                                                                 | FeatureMatrix <sub>0</sub> {#,FeatureMatrix} |                                                        |
| Trigger::=                                                                                 | FeatureMatrix {#,FeatureMatrix}              |                                                        |
| <i>Build feature matrices from constant phoneme or sequence of <math>\pm</math>feature</i> |                                              |                                                        |
| FeatureMatrix ::=                                                                          | Phoneme                                      |                                                        |
| FeatureMatrix ::=                                                                          | [ ]                                          | <i>empty feature matrix</i>                            |
| FeatureMatrix ::=                                                                          | [+ Feature FeatureMatrix]                    | <i>+feature appended to matrix</i>                     |
| FeatureMatrix ::=                                                                          | [- Feature FeatureMatrix]                    | <i>-feature appended to matrix</i>                     |
| Phoneme ::=                                                                                | $\emptyset$   a   g   ...                    | <i>a constant phoneme</i>                              |
| Feature ::=                                                                                | voice   nasal   coronal   ...                | <i>a phonological feature</i>                          |
| <i>integer indices are used for copying, see caption</i>                                   |                                              |                                                        |
| $\mathbb{Z}$ ::=                                                                           | -2   -1   1   2                              | <i>copying target, an integer</i>                      |
| $\alpha$ ::=                                                                               | -2   -1   1   2                              | <i>place copy target, an integer</i>                   |

Figure S5: Context-free grammar generating phonological rules used by our system. Non-terminal symbols begin with a capital letter, as well as  $\mathbb{Z}$  and  $\alpha$ . For increased tractability, we arbitrarily bound the size of each FeatureMatrix to have had most three features, and as outlined in the above grammar over SPE rules, each trigger may have at most two feature matrices, hence the maximum range of copying targets ( $\mathbb{Z}/\alpha$ ) of  $\pm 2$ . Copying targets are expressed as integers indexing into the triggering environments. For example the rule  $V \rightarrow V_i / V_{i\_CC}$  is expressed using the above grammar as  $V \rightarrow -1 / V\_CC$ , while the rule  $V \rightarrow V_i / C\_C_0V_i$  would be expressed as  $V \rightarrow 2 / C\_C_0V$ .

```

Rule::= FC → FC / Trigger_Trigger
Rule::= [ +vowel ] → [ -highTone ] / _[ -vowel ]* [ +highTone +vowel ]
Rule::= [ -sonorant ] → [ -voice ] / _Trigger
Rule::= [ +nasal ] → αplace / Trigger_[ -vowel ]
Rule::= [ +vowel ] → [ +highTone ] / [ +highTone +vowel ] [ -vowel ]0_Trigger
Rule::= [ +vowel ] → [ -back -low ] / [ -back +vowel ] FeatureMatrix0_
Rule::= [ -vowel ] → [ +voice ] / _[ -sonorant +voice ]
Rule::= FC → [ +continuant ] / FeatureMatrix_[ +vowel ]
Rule::= [ -sonorant ] → FeatureMatrix / _[ -sonorant ]
Rule::= [ +voice ] → FC / FeatureMatrix [ -vowel ]_Trigger
Rule::= [ -voice ] → [ +voice ] / [ +nasal ] [ -vowel ]0_
Trigger::= #
Trigger::= FeatureMatrix #
Trigger::= FeatureMatrix0 FeatureMatrix #
Trigger::= FeatureMatrix FeatureMatrix #
Trigger::= {#,FeatureMatrix}
Trigger::= FeatureMatrix0 {#,FeatureMatrix}
Trigger::= FeatureMatrix {#,FeatureMatrix}
Trigger::=
Trigger::= FeatureMatrix
Trigger::= FeatureMatrix* FeatureMatrix
Trigger::= FeatureMatrix FeatureMatrix
Trigger::= [ -vowel ]* [ +highTone +vowel ]
FeatureMatrix::= +
FeatureMatrix::= Phoneme
FeatureMatrix::= [ -sonorant ]
FeatureMatrix::= [ +vowel +highTone ]
FeatureMatrix::= [ -vowel ]
FeatureMatrix::= [ -voice ]
FeatureMatrix::= [ +vowel ]
FeatureMatrix::= [ -back +vowel ]
FeatureMatrix::= [ -sonorant +voice ]
FeatureMatrix::= [ +nasal ]
FeatureMatrix::= [ +voice ]
FeatureMatrix::= [ +continuant -high ]
FC::= ∅
FC::= Z
FC::= αplace
FC::= FeatureMatrix

```

Figure S6: Symbolic structure of learned grammar over phonological rules. This grammar is estimated from a training set of 30 textbook problems selected for representativeness and diversity, and captures typically occurring motifs and schemas across grammars from the world’s languages. Nonterminal FC refers to either the Focus or Change of a rule.



## S3 Supplemental Methods

### S3.1 Input data format

With the exception of allophony problems, each textbook problem consists of a matrix of surface forms, where the columns correspond to different inflections, and the rows correspond to different stems. Matrix entries can be empty (unspecified), either due to missing data, or due to a particular inflection not applying to a particular stem (for example, there is no past tense form of a stem like “pineapple” because it is a noun and not a verb). Slightly overloading notation used in the main manuscript, we refer to this matrix as  $\mathbf{X}$ , and can index the rows of  $\mathbf{X}$  (lexemes) and the columns of  $\mathbf{X}$  (inflections). For example, Figure S7A shows a paradigm matrix  $\mathbf{X}$  for a basic problem from Russian. There are 2 inflections (nominative and genitive), corresponding to the columns of the matrix, and 4 stems, corresponding to the rows of the matrix.

Allophony problems consist of a set of surface forms along with a set of pairs of phonemes, known as ‘allophones’, which we treat as a substitution on phonemes. Figure S7B shows an allophony problem from Mohawk.

| <b>A</b>         |                        |                          | <b>B (i)</b>          |              | <b>B (ii)</b> |            |
|------------------|------------------------|--------------------------|-----------------------|--------------|---------------|------------|
|                  | Nominative             | Genitive                 |                       | Surface form | Allophones    | Allophones |
| <i>wagon</i>     | vagon                  | vagona                   | <i>pigeon</i>         | oli:de?      | 1             | 2          |
| <i>car</i>       | avtomobil <sup>ǰ</sup> | avtomobil <sup>ǰ</sup> a | <i>hide it! (sg.)</i> | zahset       | b             | p          |
| <i>evening</i>   | vet <sup>ǰ</sup> er    | vet <sup>ǰ</sup> era     | <i>stocking</i>       | ga:lis       | d             | t          |
| <i>husband</i>   | muǰ                    | muǰa                     | <i>tail</i>           | odahsa       | g             | k          |
| <i>pencil</i>    | karandaf               | karandafa                | <i>five</i>           | wisk         |               |            |
| <i>eye</i>       | glas                   | glaza                    | <i>two</i>            | degeni       |               |            |
| <i>threshold</i> | porok                  | poroga                   | <i>Abraham</i>        | aplam        |               |            |

Figure S7: **A**. An example paradigm matrix from Russian, which is a common format for the input data  $\mathbf{X}$ . Columns correspond to different inflections (nominative, genitive) while the rows correspond to different stems (wagon, car, evening, ...). For example, [vagona] means *wagon* in the genitive form. **B**. Example allophone problem (a subset of data from Mohawk). A set of surface forms are given **(i)** together with pairs of possible allophones **(ii)**, and the challenge is to find rule(s) which can predict one set of allophones from the other. There are 3 allophone pairs in this example.

### S3.2 Counter-Example Guided Inductive Synthesis

We adapted counter-example guided inductive synthesis (CEGIS: [2]) to our setting (‘CEGIS’ in Figure 5) by maintaining (1) a ‘current’ theory, (2) a ‘covered’ set of rows of  $\mathbf{X}$  for which there exists a stem such that the the current theory is consistent with that row; and then repeatedly (3) searching for the next counterexample, i.e. a row of  $\mathbf{X}$  which is inconsistent with the current theory, and then using the Sketch program synthesizer to (4) update the current theory to be the MAP estimate of the theory that explains both this counterexample and the covered examples, and then (5) adding this most recent example to the ‘covered’ set. Because Sketch requires a finite program space we must also bound the number of rules searched over during step (4). We allow Sketch to search over at most  $K + 1$  rules, where  $K$  is the number of rules in the most recent current theory.

### S3.3 Incremental synthesis of grammars

Our incremental approach to synthesizing phonological grammars combines and generalizes counterexample guided synthesis with test-driven synthesis [3]. Similar to our CEGIS algorithm, we maintain a ‘current’ theory as well as a set of ‘covered’ examples, and repeatedly search for a (non-covered) counterexample to the current theory. However, rather than resolve from scratch for a new theory accommodating both the counterexample and the covered examples, we search only over those theories close in *edit distance* to the most recent theory.

We define the edit distance,  $d(\mathbf{T}_1, \mathbf{T}_2)$ , between a pair of theories  $\mathbf{T}_1, \mathbf{T}_2$  by counting the number of insertions, deletions, substitutions, and swaps that separate the sequences of rules for  $\mathbf{T}_1$  and  $\mathbf{T}_2$ . Any modification to a rule counts as a complete substitution, so entire rules are resynthesized wholesale rather than, e.g., have individual feature matrices ‘edited’. This coarse-grained notion of edit distance has the advantage that it can be easily encoded in a SAT solver, and we hypothesize it may be less prone to getting trapped in local optima because it encourages larger search moves.

For each counterexample, we progressively increment the maximum edit distance until Sketch discovers a satisfying solution. We furthermore ‘minibatch’ counterexamples, grouped by lexeme (row of  $\mathbf{X}$ ) and ordered according to the textbook problem. We automatically set the number of lexemes in each batch differently depending on the number of inflections (columns of  $\mathbf{X}$ ) such that the surface forms in a minibatch will be no more than nine (ie, with 3 inflections, each minibatch will comprise 3 lexemes; with 4 inflections, each minibatch will comprise 2 lexemes). We conjecture that larger batch size generally leads to better convergence, because this exposes the SAT solver to more data at once, which on balance should lead to less myopic search moves. Yet larger batch sizes increase compute requirements, both because the size of the SAT problem grows linearly with batch size and because the search radius may need to grow larger with increased batch size. Accordingly, for allophony alternation problems, we batch the entire problem at once, because these problems are much easier. Our selection of a minibatch size of 9 was motivated by informal pilot experiments suggesting that after around 9 new words the solver performance degraded severely; due to the high compute cost of running these simulations, we did not perform a systematic hyperparameter sweep, and the ‘optimal’ batch size may differ from the one used.<sup>2</sup>

As a concrete example, consider a data set of English verb inflections in infinitive and third-person plurals. Suppose the batch size is two. If the first paradigm row is [mit] and [mits] (the pronunciations of the words “meet” and “meets”), then these are the first two words that the system considers. Initially,  $\mathbf{T}_0$  contains no rules. So, these words serve as a counterexample, because the third-person-singular morphology, namely that a suffix must be appended (and that in the lexicon this suffix is recorded as /s/) has not yet been inferred. Running Sketch on this example would update the grammar to contain the third-person-singular suffix /s/, and introduce no new phonological rules. Suppose that the next paradigm row is [it] and [its] (the pronunciations of the words “eat” and “eats”). The system will find that the current grammar, when supplemented with the stem /it/, explains this example, and so it does not serve as a counterexample, because the morphophonology inferred from the first batch is consistent with this example. Suppose that the next row of the paradigm is [nid] and [nidz] (pronunciations of the words “need” and “needs”). There is no stem which can explain this paradigm row, given the current affixes and rules. Therefore it is a counterexample, and in the next iteration the system will accommodate this counterexample by introducing a phonological rule about explains the alternation between /s/ and /z/.

**Parallelism.** A naive implementation of this approach would encode the edit-distance constraint directly into the Sketch system. A more efficient, parallelizable approach is to enumerate a finite set of *theory templates*, where each template corresponds to a family of edits to the original theory. A *theory template* is a list, where each list element is either a fixed rule or a new unknown rule that the Sketch solver will solve for. The theory templates compatible with current rules  $\{r_k\}_{k=1}^K$  is

$$\begin{aligned} \text{TEMPLATES}(\{r_k\}_{k=1}^K, D) = \left\{ \{r''_{k'}\}_{k'=1}^{K'} \quad : \quad \underbrace{\forall \{r'_{k'}\}_{k'=1}^{K'} \text{ where } d(\{r'_{k'}\}_{k'=1}^{K'}, \{r_k\}_{k=1}^K) = D}_{\text{for all edits w/ edit distance } D} \right. \\ \left. \text{and } \forall k' : \underbrace{r''_{k'} = ?? \text{ if } r'_{k'} \notin \{r_k\}_{k=1}^K}_{\text{new rule, denoted ??}} \right. \\ \left. \text{and } \forall k' : \underbrace{r''_{k'} = r'_{k'} \text{ if } r'_{k'} \in \{r_k\}_{k=1}^K}_{\text{fixed rule}} \right\} \quad (1) \end{aligned}$$

where we have followed the convention, from Sketch, of writing ?? for unknown parts of the program that need to be synthesized. With this subroutine in hand we can define a constraint,  $C_{\text{TEMPLATE}}$ , upon theories,

<sup>2</sup>Sketch requires further hyperparameters relating to converting an infinite program space to a finite one, such as an upper bound on the number of loop iterations. We set such upper bounds automatically so that the system can handle the longest surface form in the data: the loop iteration bound is the length of the longest surface form plus two, where +2 comes from a +1 buffer and another +1 due to implementation details.

datasets, and templates:

$$C_{\text{TEMPLATE}}(\mathbf{T}, \mathbf{X}, \{r_k\}_{k=1}^K) = C(\mathbf{T}, \mathbf{X}) \wedge \forall k : (r_k \neq ??) \implies (r_k = \text{the } k^{\text{th}} \text{ rule in } \mathbf{T}) \quad (2)$$

where  $C$  imposes the constraint that  $\mathbf{T}$  explains  $\mathbf{X}$  (Eq. 4 of main text). This constraint can be passed to Sketch. We can now rewrite the incremental synthesis update equations from Eq. 6-7 of the main text to

$$D_{t+1} = \min_D D, \text{ such that } \exists \{r_k\}_{k=1}^K \in \text{TEMPLATES}(\mathbf{T}_t, D) \text{ and } C_{\text{TEMPLATE}}(\mathbf{T}, \mathbf{X}_{t+1}, \{r_k\}_{k=1}^K) \quad (3)$$

$$\mathbf{T}_{t+1} = \arg \max_{\mathbf{T}} F(\mathbf{X}_{t+1}, \mathbf{T}), \text{ such that } \exists \{r_k\}_{k=1}^K \in \text{TEMPLATES}(\mathbf{T}_t, D_{t+1}) \text{ and } C_{\text{TEMPLATE}}(\mathbf{T}, \mathbf{X}_{t+1}, \{r_k\}_{k=1}^K) \quad (4)$$

This refactoring of our algorithm exposes an opportunity for parallelism: Given a specific value of  $\{r_k\}_{k=1}^K$  drawn from  $\text{TEMPLATES}(\mathbf{T}_t, D)$  we can straightforwardly solve the above equations using Sketch, so we simply loop over each such template and allocate a parallel worker to it. An outer loop monotonically increases the search distance  $D$ , and a parallel inner loop checks if any  $D$ -distance template satisfies  $C_{\text{TEMPLATE}}$ . When we find a  $D$  with such templates we return the best satisfying  $\mathbf{T}$  under  $F(\mathbf{X}, \cdot)$ .

We used 40 CPUs in our experiments. Unfortunately, our method *does not* saturate the parallel compute resources of many-core machines until the number of rules grows large. Therefore, we observe very little speed up on easier problems. This is because the number of distinct templates is smaller when there are fewer rules. For example, editing a theory with a single rule  $r_1$  yields the templates  $\{r'_1 = ??\}$  and  $\{r'_1 = ??, r'_2 = ??\}$ , and so we only have two parallel jobs (other templates, such as  $\{r'_1 = r_1, r'_2 = ??\}$ , are subsumed by the latter template).

### S3.4 Bayesian prior over grammars

As a baseline UG, we simply count the number of symbols present in the lexicon and rules; we heuristically penalize insertions, deletions, and constant phonemes by counting them as two symbols:

$$\begin{aligned} P(\mathbf{L}) &\propto \prod_{\langle f, c, m \rangle \in \mathbf{L}} \exp(-\text{length}(f)), \text{ } f \text{ a form in the lexicon} \\ P(\mathbf{T}) &\propto \prod_{r \in \mathbf{T}} \exp(-\text{cost}(r)) \\ \text{cost}(\text{focus} \rightarrow \text{change} / \text{left\_right}) &= \text{cost}(\text{focus}) + \text{cost}(\text{change}) + \text{cost}(\text{left}) + \text{cost}(\text{right}) \\ \text{cost}(\emptyset) &= 2 \\ \text{cost}(k) &= 2, \text{ } k \text{ a constant phoneme} \\ \text{cost}([\pm \text{feature}_1 \dots \pm \text{feature}_n]) &= 1 + n \\ \text{cost}(\#) &= 1 \\ \text{cost}(\{\#, m\}) &= 1 + \text{cost}(\#) + \text{cost}(m) \\ \text{cost}(m_0) &= 1 + \text{cost}(m) \\ \text{cost}(uv) &= \text{cost}(u) + \text{cost}(v), \text{ when } u, v \text{ elements of a trigger} \end{aligned}$$

As a concrete example, the system solves the Russian problem in Fig. S7A using one rule:

$$\underbrace{[-\text{son}]}_{\text{cost}=1+1} \rightarrow \underbrace{[-\text{voice}]}_{\text{cost}=1+1} / \underbrace{\#}_{\text{cost}=1} \quad \text{total cost } 5$$

Therefore the total theory cost is 5, and the theory prior is  $P(\mathbf{T}) \propto \exp(-5)$ . This is defined up to a constant proportionality. The normalizing constant is guaranteed to be well-defined because Sketch only considers finite program spaces, hence a finite number of possible rule sequences. Because we only care about the relative probabilities of candidate grammars, we can ignore the normalizing constant.

In solving Fig. S7A the system also constructs a lexicon, which participates in the prior probability calculation. This contains affixes for the nominative and genitive:

$$\mathbf{L} \supset \{ \langle \epsilon, \text{pfx}, \text{NOMINATIVE} \rangle, \langle \epsilon, \text{pfx}, \text{GENITIVE} \rangle, \langle \epsilon, \text{sfx}, \text{NOMINATIVE} \rangle, \langle \text{a}, \text{sfx}, \text{GENITIVE} \rangle \}$$

where  $\epsilon$  is the empty string. The total length of all affixes is  $0 + 0 + 0 + 1 = 1$ , contributing a factor of  $e^{-1}$  to  $P(\mathbf{L})$ . The latent stems also contribute factors to  $P(\mathbf{L})$ , because they are members of  $\mathbf{L}$ :

$$\mathbf{L} \supset \{ \langle \text{vagon, stem, WAGON} \rangle, \langle \text{avtomobil}^{\text{I}}, \text{stem, CAR} \rangle, \langle \text{vet}^{\text{I}}\text{er, stem, EVENING} \rangle, \\ \langle \text{mu}^{\text{3}}, \text{stem, HUSBAND} \rangle, \langle \text{karandaf, stem, PENCIL} \rangle, \langle \text{glaz, stem, EYE} \rangle, \langle \text{porog, stem, THRESHOLD} \rangle \}$$

Above, the total length of the listed stems is  $5+9+5+3+8+4+5=39$ , which contributes an additional factor of  $e^{-39}$  to  $P(\mathbf{L})$ . If the Russian problem comprised only the data in Fig. S7A, then the prior probability of lexicon would be  $P(\mathbf{L}) \propto e^{-39}e^{-1}$ , the prior probability of the theory would be  $P(\mathbf{T}) \propto e^{-5}$ , and the total probability of the grammar would be  $P(\mathbf{L}, \mathbf{T}) \propto e^{-39}e^{-1}e^{-5}$ .

### S3.5 Ablation studies

We studied several ablations<sup>3</sup> of our system; see Fig. 5. We found that basic representational concerns matter most: one *needs* the right rule representation, which we think of as being part of universal grammar. We studied the effect of changing the feature system, as well as the effect of ablating two key computational mechanisms (having features at all, and having Kleene star).

- We first changed the feature system from so-called ‘articulatory’ features to ‘phonetic’ features. Typically introductory phonology courses start by introducing phonetic features (features of sounds). Later one typically learns that these features can be more concisely and more generically expressed in terms of features of the motor actions required to produce those sounds (‘articulation’). For example, *fricative* is an phonetic feature which becomes deprecated by the articulatory feature of *continuant*. Concretely, we took Odden’s text *Introducing Phonology* [4] and identified the features used in the first five chapters as ‘phonetic’ features. Features in Chapter 6 onward we identify as ‘articulatory features’.

‘Articulatory’ features, as indicated by this textbook boundary, include: anterior, aspirated, back, bilabial, continuant, coronal, delayedRelease, flap, glide, high, highTone, lateral, liquid, long, low, lowTone, nasal, palatal, palletized, retroflex, risingTone, rounded, sibilant, sonorant, syllabic, tense, trill, unreleased, voice, vowel.

‘Phonetic’ features, as indicated by this textbook boundary, include: affricate, alveolar, alveopalatal, aspirated, back, bilabial, central, dental, flap, fricative, front, glide, high, highTone, labiodental, laryngeal, lateral, liquid, long, low, lowTone, middle, nasal, palatal, palletized, pharyngeal, retroflex, rounded, sonorant, stop, syllabic, tense, trill, unreleased, uvular, velar, voice, vowel.

- For a more drastic demonstration of the centrality of basic computational mechanisms, we further ablate *all* phonological features. The system can still express rules in terms of specific phonemes, but cannot generalize and analogize across phonemes. We also remove Kleene star, which means not allowing the system to express rules whose triggers abstract over the number of times a phoneme occurs. Recall that this is notated with a subscript <sub>0</sub>, thus all of our example rules with this subscript are unexpressible by this ablation. In principle, this ablation can still learn rules whose behavior is identical to the correct rules, simply by memorizing every phoneme for which a rule applies (due to the ablation of features), and every sequence length for which a rule applies (due to the ablation of Kleene star). In practice, the system no longer has the inductive bias to learn such generalizations; and furthermore, search becomes harder because the programs become much longer due to the need to memorize many specific cases.

## S4 Full set of problems and model outputs

**Allophony problems** are given as a set of surface forms along with a set of pairs of phonemes. The goal of the student (as well as the goal of the model) is to recover rule(s) which predicts which element of each pair is the underlying form. Model outputs for alternation problems are of the form:

<sup>3</sup>An *ablation* is a variant of a system with components removed entirely or changed to be less powerful. Ablations are studied to understand the importance of the ablated components.

| Surface form                | UR                                       |
|-----------------------------|------------------------------------------|
| <i>a given surface form</i> | <i>model's predicted underlying form</i> |
|                             | ...                                      |

|                            |                           |
|----------------------------|---------------------------|
| <i>The surface form...</i> | <i>Is underlyingly...</i> |
| <i>a phoneme</i>           | <i>phoneme</i>            |

Followed by a sequence of rules output by the model.

**Non-allophony problems** are given as a matrix of surface forms, where the columns range over different inflections and the rows range over different stems. Missing data is notated with a dash (–). We show the model’s predicted concatenative morphology in the first row of each such matrix. In the penultimate column of each matrix we show the predicted underlying stems, and in the final column of each matrix we show the ground truth annotations. After each such matrix we show the rules output by the model. For example,

| stem | stem+i | ŪR   | UR          |
|------|--------|------|-------------|
| klup | klubi  | klub | <b>klub</b> |
| trup | trupi  | trup | <b>trup</b> |
|      | ...    |      | ...         |

illustrates a problem with two inflections, where the input to the model is the data colored purple, from which it synthesizes the morphology and stems in salmon, which should be compared with the ground truth annotation in bold.

**Manual rule grading:** We evaluate the system’s predicted rules on 15 randomly sampled problems, which are flagged with the text ‘This problem was manually graded’. Notes from the grading process are provided for these problems. These notes specify the phonological processes (i.e. rules) that are deemed as ‘ground truth’; which rules from the system correspond to those ground-truth processes; and which rules from the system are not part of the ground-truth solution (i.e. spurious rules).

Ewe:

| Surface form | UR       |
|--------------|----------|
| zrɔ̃         | zrɔ̃     |
| ɲra          | ɲra      |
| lɔ̃          | rɔ̃      |
| kpla         | kpra     |
| mlagoo       | mragoo   |
| gblaa        | gbraa    |
| lolo         | roro     |
| wlu          | wru      |
| βla          | βra      |
| srɔ̃         | srɔ̃     |
| lākɛ         | rākɛ     |
| hle          | hre      |
| vɔ̃          | vɔ̃      |
| atra         | atra     |
| dru          | dru      |
| fle          | fɛ       |
| glamaa       | gramaa   |
| litsa        | ritsa    |
| dzre         | dzre     |
| ɣla          | ɣra      |
| xlolo        | xroroo   |
| tsro         | tsro     |
| ɸle          | ɸɛ       |
| blema        | brema    |
| dɔ̃lele      | dɔ̃reɛ   |
| ɲɔ̃          | ɲɔ̃      |
| jre          | jre      |
| adoglo       | adogro   |
| kplu         | kpru     |
| kpali        | kpari    |
| klalo        | kraro    |
| atrakpoe     | atrakpoe |

| <i>The surface form...</i> | <i>Is underlyingly...</i> |
|----------------------------|---------------------------|
| l                          | r                         |

Rules:

[ +liquid ] → [ +lateral ] / { [ -palletized  
-coronal ], # } \_

Ganda:

| Surface form | UR        |
|--------------|-----------|
| kola         | kola      |
| lwana        | lwana     |
| buulira      | buulila   |
| lja          | lja       |
| luula        | luula     |
| omugole      | omugole   |
| lumonde      | lumonde   |
| eddwaliro    | eddwalilo |
| oluganda     | oluganda  |
| olulimi      | olulimi   |
| wulira       | wulila    |
| beera        | beela     |
| jjukira      | jjukila   |
| erjato       | eljato    |
| omuliro      | omulilo   |
| effirimbi    | effilimbi |
| emmeeri      | emmeeli   |
| eraddu       | eladdu    |
| wawaabira    | wawaabila |
| lagira       | lagila    |
| ebendera     | ebendela  |
| leerwe       | leelwe    |
| luula        | luula     |
| ssaffaali    | ssaffaali |

| <i>The surface form...</i> | <i>Is underlyingly...</i> |
|----------------------------|---------------------------|
| r                          | l                         |

Rules:

[ ] → [ -lateral ] / [ -back ]\_

Papago:

| Surface form         | UR                  |
|----------------------|---------------------|
| bíd <sup>s</sup> im  | bíd <sup>h</sup> im |
| tá:pan               | tá:pan              |
| hídod                | hídod               |
| t <sup>h</sup> íkid  | tíkid               |
| gátwid               | gátwid              |
| t <sup>h</sup> úku   | túku                |
| dágsp                | dágsp               |
| tóha                 | tóha                |
| d <sup>s</sup> ú:kí  | dú:kí               |
| híwgid               | híwgid              |
| t <sup>h</sup> íhaŋ  | tíhaŋ               |
| tóñi                 | tóñi                |
| wíɖut                | wíɖut               |
| tá:taɖ               | tá:taɖ              |
| kí:t <sup>h</sup> ud | kí:tud              |
| dó:dom               | dó:dom              |
| tá:tam               | tá:tam              |

| <i>The surface form...</i> | <i>Is underlyingly...</i> |
|----------------------------|---------------------------|
| d <sup>s</sup>             | d                         |
| t <sup>h</sup>             | t                         |

Rules:

$$\begin{bmatrix} \text{-nasal} \\ \text{+coronal} \\ \text{-retroflex} \end{bmatrix} \rightarrow \begin{bmatrix} \text{-anterior} \\ \text{+sibilant} \end{bmatrix} / \text{-[ +high ]}$$



Proto-Bantu:

| Surface form | UR    |
|--------------|-------|
| βale         | βale  |
| leme         | leme  |
| taβe         | taβe  |
| pala         | pala  |
| konde        | konle |
| zɔŋgɔ        | zɔŋɣɔ |
| βeɣa         | βeɣa  |
| βembe        | βemβe |
| limo         | limo  |
| kaŋga        | kaŋɣa |
| ɣombe        | ɣomβe |
| leɔ          | leɔ   |
| kiya         | kiɣa  |
| ɣiye         | ɣiye  |
| kulu         | kulu  |
| oŋgo         | oŋɣo  |
| tende        | tenle |
| zala         | zala  |
| zɔɣu         | zɔɣu  |
| βele         | βele  |
| lelu         | lelu  |
| eɣi          | eɣi   |
| kiŋgɔ        | kiŋɣɔ |
| nto          | nto   |

| <i>The surface form...</i> | <i>Is underlyingly...</i> |
|----------------------------|---------------------------|
| b                          | β                         |
| d                          | ɫ                         |
| g                          | ɣ                         |

Rules:

$$\left[ \begin{array}{c} \text{ } \\ \text{ } \end{array} \right] \rightarrow \text{d} / \text{n}_-$$

$$\left[ \begin{array}{c} \text{ } \\ \text{ } \end{array} \right] \rightarrow \left[ \text{-continuant} \right] / \left[ \text{+nasal} \right]_-\left[ \begin{array}{c} \text{ } \\ \text{ } \end{array} \right]$$

Mohawk:

| Surface form | UR        |
|--------------|-----------|
| oli:deʔ      | olirteʔ   |
| zahset       | zahset    |
| ga:lis       | ka:lis    |
| odahsa       | otahsa    |
| wisk         | wisk      |
| degeni       | tekeni    |
| aplam        | aplam     |
| oja:gala     | oja:kala  |
| ohjotsah     | ohjotsah  |
| labahbet     | lapahpet  |
| sdu:ha       | stu:ha    |
| dʰiks        | dʰiks     |
| desdaʔn̩     | testaʔn̩  |
| de:zekn̩w    | te:zekn̩w |

| <i>The surface form...</i> | <i>Is underlyingly...</i> |
|----------------------------|---------------------------|
| b                          | p                         |
| d                          | t                         |
| g                          | k                         |

*Rules:*

[ -continuant ] → [ +voice ] / \_[ +vowel ]

Quechua (Cuzco dialect):

| Surface form | UR       |
|--------------|----------|
| qori         | quri     |
| tʰoxʎu       | tʰuxʎu   |
| qomir        | qumir    |
| niŋri        | niŋri    |
| moqo         | muqu     |
| hoqara       | huqara   |
| pʰulju       | pʰulju   |
| jujaŋ        | jujaŋ    |
| tulju        | tulju    |
| api          | api      |
| suti         | suti     |
| oxqoj        | uyquj    |
| tʰilwi       | tʰilwi   |
| tʰitʰiŋ      | tʰitʰiŋ  |
| tʰanqa:j     | tʰanqa:j |
| anqosa:j     | anqusa:j |
| qetʰuŋ       | qitʰuŋ   |
| pisqo        | pisqu    |
| musox        | musux    |
| tʰuŋka       | tʰuŋka   |
| janqaŋ       | janqaŋ   |
| tʰulju       | tʰulju   |
| qhelja       | qhilja   |
| qenqo        | qinqu    |
| tʰeqaŋ       | tʰiqaŋ   |
| qaŋ          | qaŋ      |
| noqa         | nuqa     |
| tʰaxra       | tʰaxra   |
| tʰexniŋ      | tʰixniŋ  |
| soxta        | suxta    |
| axna         | axna     |
| ljixlja      | ljixlja  |
| qosa         | qusa     |
| qara         | qara     |
| alqo         | alqu     |
| senqa        | siŋqa    |
| karu         | karu     |
| atox         | atux     |
| qaŋkuna      | qaŋkuna  |
| pusax        | pusax    |
| teɣwaj       | tiɣwaj   |
| tʰaki        | tʰaki    |
| wateɣ        | watiɣ    |
| aŋka         | aŋka     |
| waxta:j      | waxta:j  |
| haku         | haku     |
| waqaj        | waqaj    |
| kaŋka        | kaŋka    |
| waxtʰa       | waxtʰa   |
| waleɣ        | waliɣ    |
| tʰakaj       | tʰakaj   |
| reɣsisqa     | riɣsisqa |

| <i>The surface form...</i> | <i>Is underlyingly...</i> |
|----------------------------|---------------------------|
| e                          | i                         |
| o                          | u                         |
| ŋ                          | ŋ                         |

*Rules:*

[ -continuant ] → n / \_q

u → o / - [ +back  
-high ]

u → o / q\_

i → e / [ -palletized ]\_ [ -anterior ]\_o [ -nasal  
+back ]

Lhasa Tibetan:

| Surface form         | UR                   |
|----------------------|----------------------|
| ajgu                 | ajku                 |
| ajtãã                | ajtãã                |
| ajba                 | ajpa                 |
| apsoo                | apsoo                |
| amtʰɔɔ               | amtʰɔɔ               |
| tuktüü               | tuktüü               |
| amto                 | amto                 |
| iyu                  | iyu                  |
| imtʰi                | imtʰi                |
| ut̚i                 | ut̚i                 |
| uβu                  | uβu                  |
| ea                   | ea                   |
| embo                 | empo                 |
| ʊtsi                 | ʊtsi                 |
| qa                   | ka                   |
| qaa                  | kaa                  |
| qajba                | kajpa                |
| qamba                | kampa                |
| qam                  | kam                  |
| qamtoo               | kamtoo               |
| qaaβo                | kaaβo                |
| kikt̚i               | kikt̚i               |
| kiβu                 | kiβu                 |
| kiŋguu               | kiŋkuu               |
| kik                  | kik                  |
| kiɽuu                | kiɽuu                |
| kucuu                | kucuu                |
| kurii                | kurii                |
| kiiyuu               | kiiyuu               |
| ku                   | ku                   |
| kupci                | kupci                |
| kupcaa               | kupcaa               |
| kenca                | kenca                |
| kembo                | kempo                |
| keyöo                | keyöo                |
| kerβa                | kerβa                |
| qo                   | ko                   |
| qomba                | kompa                |
| qər                  | kər                  |
| qɔɔɔ                 | kɔɔɔ                 |
| tʰ <sup>h</sup> ea   | tʰ <sup>h</sup> ea   |
| tʰ <sup>h</sup> uɣum | tʰ <sup>h</sup> uɣum |
| topcaa               | topcaa               |
| tʰ <sup>h</sup> oöo  | tʰ <sup>h</sup> oöo  |
| ɽaaãã                | ɽaaãã                |
| ɽuyi                 | ɽuyi                 |
| ɽungo                | ɽungo                |
| neŋgaa               | neŋgaa               |
| paŋgɔɔ               | paŋgɔɔ               |
| peβãã                | peβãã                |
| simgãã               | simgãã               |

| <i>The surface form...</i> | <i>Is underlyingly...</i> |
|----------------------------|---------------------------|
| b                          | p                         |
| d                          | t                         |
| g                          | g                         |
| ɽ                          | t̚                        |
| n                          | ŋ                         |
| q                          | k                         |

g k

---

*Rules:*

$[ +\text{high} ] \rightarrow \left[ \begin{array}{l} -\text{sonorant} \\ -\text{high} \end{array} \right] / - \left[ \begin{array}{l} -\text{nasal} \\ +\text{high} \end{array} \right]_0 \left[ \begin{array}{l} +\text{back} \\ -\text{high} \end{array} \right]$

$[ -\text{coronal} ] \rightarrow [ +\text{voice} ] / [ -\text{vowel} ]_-$

*Kikurai:*

| Surface form | UR           |
|--------------|--------------|
| aβaánto      | aβaánto      |
| aβamúra      | aβamúra      |
| amahiindi    | amahiinri    |
| amakééndɔ    | amakéénrɔ    |
| eβã          | eβã          |
| eeɣɣwé       | eeɣɣwé       |
| eɣã          | eɣã          |
| ekeβwé       | ekeβwé       |
| hoorá        | hoorá        |
| iβiyúruβe    | iβiyúruβe    |
| iβirúúngúuri | iβirúúnyúuri |
| uɣusíri      | uɣusíri      |
| βáinu        | βáinu        |
| βorjɔ        | βorjɔ        |
| it'iingéna   | it'iingéna   |
| it'iingúrúβe | it'iingúrúβe |
| ɣaβã         | ɣaβã         |
| it'iingúta   | it'iingúta   |
| βereká       | βereká       |
| iyitúúmbe    | iyitúúmβe    |
| ɣúúkã        | ɣúúkã        |
| remã         | remã         |
| rɛentã       | rɛentã       |
| oβoɣáákã     | oβoɣáákã     |
| oβotééndééru | oβotéénrééru |
| okoyéembã    | okoyéembã    |
| okoómbãra    | okoómβãra    |
| okoβãra      | okoβãra      |
| okoóndɔɣa    | okoónrɔɣa    |
| okorɔɣa      | okorɔɣa      |
| romã         | romã         |
| teyetã       | teyetã       |
| ukuúmbuurjá  | ukuúmβuurjá  |
| uruyúta      | uruyúta      |

| <i>The surface form...</i> | <i>Is underlyingly...</i> |
|----------------------------|---------------------------|
| b                          | β                         |
| d                          | r                         |
| g                          | ɣ                         |

*Rules:*

[ -sonorant ] → [ -continuant ] / [ -vowel ]\_

r → d / n\_

Modern Greek:

| Surface form       | UR     |
|--------------------|--------|
| kano               | kano   |
| kori               | kori   |
| xano               | xano   |
| xori               | xori   |
| x <sup>h</sup> ino | xino   |
| k <sup>h</sup> ino | kino   |
| krima              | krima  |
| xrima              | xrima  |
| xufta              | xufta  |
| kufeta             | kufeta |
| kali               | kali   |
| xali               | xali   |
| x <sup>h</sup> eli | xeli   |
| k <sup>h</sup> eri | keri   |
| x <sup>h</sup> eri | xeri   |
| ox <sup>h</sup> i  | oxi    |

| <i>The surface form...</i> | <i>Is underlyingly...</i> |
|----------------------------|---------------------------|
| x <sup>h</sup>             | x                         |
| k <sup>h</sup>             | k                         |

Rules:

$$[ +\text{back} ] \rightarrow [ +\text{palletized} ] / - \left[ \begin{array}{l} -\text{back} \\ +\text{tense} \end{array} \right]$$



Farsi:

| Surface form | UR        |
|--------------|-----------|
| ǣrtef       | ǣrtef    |
| fārsi       | fārsi    |
| qǣdfi       | qǣdfi    |
| řah          | řah       |
| řast         | řast      |
| řiř          | řiř       |
| ahař         | ahař      |
| axǣř        | axǣř     |
| hǣřtowĩ     | hǣřtowĩ  |
| fiř          | fiř       |
| ahaři        | ahaři     |
| bǣřadǣř    | bǣřadǣř |
| tʃēřa       | tʃēřa    |
| dařid        | dařid     |
| biřǣng      | biřǣng   |
| fiřimi       | fiřimi    |

| <i>The surface form...</i> | <i>Is underlyingly...</i> |
|----------------------------|---------------------------|
| ř                          | ĩ                         |

*Rules:*

[ +liquid ] → ř / [ +vowel ]-[ +vowel ]

Osage:

| Surface form          | UR                    |
|-----------------------|-----------------------|
| dábrĩ                 | ǎábrĩ                 |
| áǎik <sup>h</sup> ǎǎã | áǎik <sup>h</sup> ǎǎã |
| dat <sup>l</sup> pé   | ǎat <sup>l</sup> pé   |
| t <sup>l</sup> ǎéǎe   | t <sup>l</sup> ǎéǎe   |
| dak <sup>l</sup> ǎé   | ǎak <sup>l</sup> ǎé   |
| ǎéze                  | ǎéze                  |
| dǎlĩ                  | ǎǎlĩ                  |
| ǎíe                   | ǎíe                   |
| daftú                 | ǎaftú                 |
| ǎí <sup>l</sup> ki    | ǎí <sup>l</sup> ki    |

| <i>The surface form...</i> | <i>Is underlyingly...</i> |
|----------------------------|---------------------------|
| d                          | ǎ                         |

Rules:

[ ] → [ -continuant ] / \_[ +low ] [ ]

Amharic:

| Surface form | UR        |
|--------------|-----------|
| fərəs        | fərəs     |
| tənəsa       | tənəsa    |
| jəlɨflɨf     | jəlɨflɨf  |
| majət        | majət     |
| gənzəb       | gənzəb    |
| fɛgna        | fəgna     |
| nəñ          | nəñ       |
| məwdəd       | məwdəd    |
| mənnəsət     | mənnəsət  |
| məmkər       | məmkər    |
| ʒələ         | ʒələ      |
| jəlləm       | jəlləm    |
| mətʃ         | mətʃ      |
| məstət       | məstət    |
| fəlləgə      | fəlləgə   |
| agəññɛ       | agəññə    |
| təmətʃʔɛ     | təmətʃʔə  |
| mökkərə      | mökkərə   |
| kəʒʒɛ        | kəʒʒə     |
| ʒəmmərə      | ʒəmmərə   |
| latʃʔɛ       | latʃʔə    |
| aʃʃɛ         | aʃʃə      |
| bəkkələ      | bəkkələ   |
| fəməggələ    | fəməggələ |

| <i>The surface form...</i> | <i>Is underlyingly...</i> |
|----------------------------|---------------------------|
| ɛ                          | ə                         |

Rules:

$$\text{ə} \rightarrow \text{ɛ} / \left[ \begin{array}{l} \text{-anterior} \\ \text{-liquid} \\ \text{-back} \end{array} \right]_{-}$$

Gen:

| Surface form | UR       |
|--------------|----------|
| agble        | agble    |
| agɔŋglo      | agɔŋglo  |
| aɲɔli        | aɲɔli    |
| akplɔ        | akplɔ    |
| sabule       | sabule   |
| sra          | sla      |
| alɔ          | alɔ      |
| atitrwe      | atitlwe  |
| avlɔ         | avlɔ     |
| blafogbe     | blafogbe |
| dre          | dle      |
| edrɔ         | edlɔ     |
| exlɔ         | exlɔ     |
| exle         | exle     |
| hle          | hle      |
| ɲlɔ          | ɲlɔ      |
| tʰrɔ         | tʰlɔ     |
| nr̩a         | nl̩a     |
| klɔ          | klɔ      |
| tre          | tle      |
| vlu          | vlu      |
| lɔ           | lɔ       |
| m̩la         | m̩la     |
| pleplelu     | pleplelu |
| wla          | wla      |
| zro          | zlo      |
| esrɔ         | eslɔ     |
| etro         | etlɔ     |
| en̩rɔ        | en̩lɔ    |
| dʒro         | dʒlɔ     |

| <i>The surface form...</i> | <i>Is underlyingly...</i> |
|----------------------------|---------------------------|
| r                          | l                         |

Rules:

[ ] → [ -lateral ] / [ +coronal ]\_

*Kishambaa:*

| Surface form            | UR                      |
|-------------------------|-------------------------|
| tagi                    | tagi                    |
| kitabu                  | kitabu                  |
| paalika                 | paalika                 |
| ni                      | ni                      |
| ɲombe                   | ɲombe                   |
| matagi                  | matagi                  |
| dodoa                   | dodoa                   |
| goʃa                    | goʃa                    |
| babu                    | babu                    |
| ndimi                   | ndimi                   |
| ɲgogo                   | ɲgogo                   |
| mbeu                    | mbeu                    |
| nt <sup>h</sup> umbii   | nt <sup>h</sup> umbii   |
| ɲok <sup>h</sup> uɲɲuni | ɲok <sup>h</sup> uɲɲuni |
| mp <sup>h</sup> eho     | mp <sup>h</sup> eho     |

| <i>The surface form...</i> | <i>Is underlyingly...</i> |
|----------------------------|---------------------------|
| $\underset{\cdot}{m}$      | m                         |
| $\underset{\cdot}{n}$      | n                         |

*Rules:*

$[ \quad ] \rightarrow [ \text{-voice} ] / - \left[ \begin{array}{l} \text{+aspirated} \\ \text{-back} \end{array} \right]$

Thai:

| Surface form                    | UR                              |
|---------------------------------|---------------------------------|
| bil                             | bil                             |
| müü                             | müü                             |
| rak <sup>ˀ</sup>                | rak <sup>ˀ</sup>                |
| baa                             | baa                             |
| loŋ                             | loŋ                             |
| brüü                            | brüü                            |
| haa                             | haa                             |
| p <sup>h</sup> laa              | p <sup>h</sup> laa              |
| dii                             | dii                             |
| t <sup>f</sup> aan              | t <sup>f</sup> aan              |
| t <sup>h</sup> ee               | t <sup>h</sup> ee               |
| t <sup>h</sup> ruumɛɛn          | t <sup>h</sup> ruumɛɛn          |
| k <sup>h</sup> ɛŋ               | k <sup>h</sup> ɛŋ               |
| panjaa                          | p <sup>h</sup> anjaa            |
| lœj                             | lœj                             |
| p <sup>h</sup> jaa              | p <sup>h</sup> jaa              |
| liiak <sup>ˀ</sup>              | liiak <sup>ˀ</sup>              |
| klaaŋ                           | k <sup>h</sup> laaŋ             |
| t <sup>h</sup> at <sup>ˀ</sup>  | t <sup>h</sup> at <sup>ˀ</sup>  |
| traa                            | t <sup>ˀ</sup> raa              |
| riip <sup>ˀ</sup>               | riip <sup>ˀ</sup>               |
| ɔk <sup>ˀ</sup>                 | ɔk <sup>ˀ</sup>                 |
| p <sup>h</sup> rɛɛ              | p <sup>h</sup> rɛɛ              |
| kiə                             | k <sup>ˀ</sup> iə               |
| k <sup>h</sup> waa              | k <sup>h</sup> waa              |
| kɛɛ                             | k <sup>ˀ</sup> ɛɛ               |
| draj                            | draj                            |
| diiŋ                            | diiŋ                            |
| kan                             | k <sup>ˀ</sup> an               |
| t <sup>f</sup> uək <sup>ˀ</sup> | t <sup>f</sup> uək <sup>ˀ</sup> |
| p <sup>h</sup> leeŋ             | p <sup>h</sup> leeŋ             |
| t <sup>h</sup> an               | t <sup>h</sup> an               |
| staaŋ                           | st <sup>ˀ</sup> aaŋ             |
| rap <sup>ˀ</sup>                | rap <sup>ˀ</sup>                |
| jiisip <sup>ˀ</sup>             | jiisip <sup>ˀ</sup>             |
| p <sup>h</sup> aa               | p <sup>h</sup> aa               |
| k <sup>h</sup> aa               | k <sup>h</sup> aa               |
| dam                             | dam                             |
| raaj                            | raaj                            |
| tit <sup>ˀ</sup>                | t <sup>ˀ</sup> it <sup>ˀ</sup>  |
| sip <sup>ˀ</sup>                | sip <sup>ˀ</sup>                |
| pen                             | p <sup>ˀ</sup> en               |

| <i>The surface form...</i> | <i>Is underlyingly...</i> |
|----------------------------|---------------------------|
| p                          | p <sup>ˀ</sup>            |
| k                          | k <sup>ˀ</sup>            |
| t                          | t <sup>ˀ</sup>            |

Rules:

[ ] → [ -unreleased ] / \_[ ]

Palauan:

| Surface form | UR        |
|--------------|-----------|
| kəðə         | kəðə      |
| bəðuk        | bəðuk     |
| ðiak         | ðiak      |
| diak         | θiak      |
| maθtɲoθ      | maθtɲoθ   |
| ðe:l         | ðe:l      |
| de:l         | θe:l      |
| ðiosəʔ       | ðiosəʔ    |
| diosəʔ       | θiosəʔ    |
| ðik          | ðik       |
| dik          | θik       |
| kuθ          | kuθ       |
| ʔoðiŋəl      | ʔoðiŋəl   |
| koaθ         | koaθ      |
| eaŋəθ        | eaŋəθ     |
| ɲərarəðə     | ɲərarəðə  |
| baθ          | baθ       |
| ieðlʔəðip    | ieðlʔəðip |
| kəðeb        | kəðeb     |
| məðəŋei      | məðəŋei   |
| uðouθ        | uðouθ     |
| olðak        | olðak     |

| <i>The surface form...</i> | <i>Is underlyingly...</i> |
|----------------------------|---------------------------|
| d                          | θ                         |

*Rules:*

[ +coronal ] → d / #\_

Russian (in metatheory training set):

| at+stem                | b <sup>h</sup> iz+stem                | u+stem                | ŨR                                 | UR                   |
|------------------------|---------------------------------------|-----------------------|------------------------------------|----------------------|
| atrózi                 | b <sup>h</sup> izrózi                 | urózi                 | rózi                               | rózi                 |
| atáli                  | b <sup>h</sup> izáli                  | uáli                  | áli                                | áli                  |
| atkaróvi               | b <sup>h</sup> izkaróvi               | ukaróvi               | karóvi                             | karóvi               |
| adbaradí               | b <sup>h</sup> izbaradí               | ubaradí               | baradí                             | baradí               |
| ats <sup>h</sup> istrí | b <sup>h</sup> iss <sup>h</sup> istrí | us <sup>h</sup> istrí | s <sup>h</sup> is <sup>h</sup> trí | s <sup>h</sup> istrí |

Rules:

[ -sonorant ] → [ -voice ] / -[ +anterior ]

[ -vowel ] → [ +voice ] / -[ -sonorant ]  
 +voice



Indonesian (in metatheory training set):

| stem    | mə+stem+i | ŪR      | UR      |
|---------|-----------|---------|---------|
| lempar  | mələmpar  | lempar  | lempar  |
| rasa    | mərasa    | rasa    | rasa    |
| wakil   | məwakili  | wakil   | wakil   |
| jakin   | məjakini  | jakin   | jakin   |
| masak   | məmasak   | masak   | masak   |
| nikah   | mənikah   | nikah   | nikah   |
| ꦗꦏꦺ     | məꦗꦏꦺ     | ꦗꦏꦺ     | ꦗꦏꦺ     |
| ꦗꦩꦧꦶ    | məꦗꦩꦧꦶ    | ꦗꦩꦧꦶ    | ꦗꦩꦧꦶ    |
| ꦲꦠ      | məꦲꦠ      | ꦲꦠ      | ꦲꦠ      |
| ꦲꦩꦧꦶ    | məꦲꦩꦧꦶ    | ꦲꦩꦧꦶ    | ꦲꦩꦧꦶ    |
| ꦲꦶ      | məꦲꦶ      | ꦲꦶ      | ꦲꦶ      |
| ꦲꦸꦢ     | məꦲꦸꦢ     | ꦲꦸꦢ     | ꦲꦸꦢ     |
| ꦒꦩꦧꦶꦫ   | məꦒꦩꦧꦶꦫ   | ꦒꦩꦧꦶꦫ   | ꦒꦩꦧꦶꦫ   |
| ꦏꦶꦫꦶꦩ   | məꦏꦶꦫꦶꦩ   | ꦏꦶꦫꦶꦩ   | ꦏꦶꦫꦶꦩ   |
| ꦢꦺꦗꦫ    | məꦢꦺꦗꦫ    | ꦢꦺꦗꦫ    | ꦢꦺꦗꦫ    |
| ꦠꦸꦭꦶꦱ   | məꦠꦸꦭꦶꦱ   | ꦠꦸꦭꦶꦱ   | ꦠꦸꦭꦶꦱ   |
| ꦧꦩꦺꦩꦧꦸꦠ | məꦧꦩꦺꦩꦧꦸꦠ | ꦧꦩꦺꦩꦧꦸꦠ | ꦧꦩꦺꦩꦧꦸꦠ |
| ꦥꦸꦏꦸꦭ   | məꦥꦸꦏꦸꦭ   | ꦥꦸꦏꦸꦭ   | ꦥꦸꦏꦸꦭ   |
| ꦢꦱꦲꦲꦶꦠ  | məꦢꦱꦲꦲꦶꦠ  | ꦢꦱꦲꦲꦶꦠ  | ꦢꦱꦲꦲꦶꦠ  |
| ꦠꦱꦲꦲꦶꦠ  | məꦠꦱꦲꦲꦶꦠ  | ꦠꦱꦲꦲꦶꦠ  | ꦠꦱꦲꦲꦶꦠ  |
| ꦲꦩꦧꦶꦫ   | məꦲꦩꦧꦶꦫ   | ꦲꦩꦧꦶꦫ   | ꦲꦩꦧꦶꦫ   |
| ꦲꦶꦱ     | məꦲꦶꦱ     | ꦲꦶꦱ     | ꦲꦶꦱ     |
| ꦲꦸꦢ     | məꦲꦸꦢ     | ꦲꦸꦢ     | ꦲꦸꦢ     |

Rules:

[ +vowel ] → ∅ / ə [ -glide ]<sub>0\_#</sub>

[ -sonorant  
+voice ] → ∅ / #<sub>-</sub>

[ -sonorant ] → [ +nasal ] / ə<sub>-</sub>

Yokuts :

| stem+it  | stem+hin | stem+nit | ŪR     | UR     |
|----------|----------|----------|--------|--------|
| xatit    | xathin   | xatnit   | xat    | xat    |
| gopit    | gophin   | gopnit   | gop    | gop    |
| gijit    | gijhin   | gijnit   | gij    | gij    |
| mutut    | muthun   | mutnut   | mut    | mut    |
| sa:pit   | saphin   | sapnit   | sa:p   | sa:p   |
| go:bit   | gobhin   | gobnit   | go:b   | go:b   |
| me:kit   | mekhin   | meknit   | me:k   | me:k   |
| ʔo:tut   | ʔothun   | ʔotnut   | uʔo:t  | uʔo:t  |
| panat    | pana:hin | pana:nit | pa:na: | pana:  |
| hojot    | hojo:hin | hojo:nit | ho:jo: | hojo:  |
| ʔilet    | ʔile:hin | ʔilemit  | ʔile:  | ʔile:  |
| cujob    | cujo:hun | cujo:nut | cujo:  | cujo:  |
| paxa:tit | paxathin | paxatnit | paxa:t | paxa:t |
| ʔopo:tit | ʔopothin | ʔopotnit | ʔopot  | ʔopot  |
| hibe:jit | hibejhin | hibejnit | hibe:j | hibe:j |
| sudokut  | sudokhun | sudoknut | sudok  | sudok  |

Rules:

$$\left[ \begin{array}{l} \text{-back} \\ \text{+vowel} \end{array} \right] \rightarrow \text{u} / \text{u} \left[ \quad \right]_0 \_$$

$$\left[ \quad \right] \rightarrow \left[ \text{-long} \right] / \_ \left[ \quad \right] \left[ \text{-vowel} \right]$$

$$\left[ \text{+vowel} \right] \rightarrow \emptyset / \{ \left[ \text{+vowel} \right], \# \} \_$$

Turkish (in metatheory training set):

| stem | stem+un | stem+lar | stem+ların | UR   | UR   |
|------|---------|----------|------------|------|------|
| ip   | ipin    | ipler    | iplerin    | ip   | ip   |
| kız  | kızın   | kızlar   | kızların   | kız  | kız  |
| jüz  | jüzün   | jüzler   | jüzlerin   | jüz  | jüz  |
| pul  | pulun   | pullar   | pulların   | pul  | pul  |
| el   | elin    | eller    | ellerin    | el   | el   |
| tʃan | tʃanın  | tʃanlar  | tʃanların  | tʃan | tʃan |
| køj  | køjün   | køjler   | køjlerin   | køj  | køj  |
| son  | sonun   | sonlar   | sonların   | son  | son  |

Rules:

$[ +\text{vowel} ] \rightarrow \left[ \begin{array}{l} -\text{back} \\ -\text{low} \end{array} \right] / \left[ \begin{array}{l} -\text{back} \\ +\text{vowel} \end{array} \right] [ \quad ]_0-$

$[ +\text{voice} ] \rightarrow [ -\text{rounded} ] / [ -\text{rounded} ] [ -\text{vowel} ]_-$

Turkish :

| stem               | stem+k               | ŪR                 | UR                 |
|--------------------|----------------------|--------------------|--------------------|
| ip                 | ipi                  | ip                 | ip                 |
| bit                | biti                 | bit                | bit                |
| sebep              | sebebi               | sebib              | sebib              |
| kanat              | kanadi               | kanid              | kanid              |
| feref              | ferefi               | ferif              | ferif              |
| kit <sup>f</sup>   | kit <sup>f</sup> i   | kit <sup>f</sup>   | kit <sup>f</sup>   |
| pilot              | pilotu               | pilout             | pilot              |
| demet              | demeti               | demit              | demet              |
| farap              | farabi               | farib              | farab              |
| ahmet              | ahmedi               | ahmeid             | ahmed              |
| pabut <sup>f</sup> | pabud <sup>3</sup> u | pabud <sup>3</sup> | pabud <sup>3</sup> |
| güt <sup>f</sup>   | güd <sup>3</sup> ü   | güd <sup>3</sup>   | güd <sup>3</sup>   |
| sepet              | sepeti               | sepit              | sepet              |
| sanat              | sanati               | sanit              | sanit              |
| kep                | kepi                 | keip               | kep                |
| kurt               | kurdu                | kurud              | kurd               |
| sat <sup>f</sup>   | sat <sup>f</sup> i   | sait <sup>f</sup>  | sat <sup>f</sup>   |
| renk               | rengi                | renig              | reng               |

Rules:

[ -sonorant ] → [ -voice ] / \_#

[ ] → [ ]<sub>i</sub> / [ ]<sub>i</sub> [ -vowel ]\_{ [ +anterior ], # }

[ +high ] → ∅ / [ +sonorant ]\_{ [ -vowel ] }

*Bukusu (in metatheory training set):*

| stem+a                                | βa+stem+a                               | ñ+stem+a                               | ŨR                                  | UR                                  |
|---------------------------------------|-----------------------------------------|----------------------------------------|-------------------------------------|-------------------------------------|
| t <sup>h</sup> a                      | βat <sup>h</sup> a                      | ñd <sup>h</sup> a                      | t <sup>h</sup>                      | t <sup>h</sup>                      |
| t <sup>h</sup> exa                    | βat <sup>h</sup> exa                    | ñd <sup>h</sup> exa                    | t <sup>h</sup> ex                   | t <sup>h</sup> ex                   |
| t <sup>h</sup> ut <sup>h</sup> uungga | βat <sup>h</sup> ut <sup>h</sup> uungga | ñd <sup>h</sup> ut <sup>h</sup> uungga | t <sup>h</sup> ut <sup>h</sup> uuñg | t <sup>h</sup> ut <sup>h</sup> uung |
| talaanda                              | βatalaanda                              | ndalaanda                              | talaand                             | talaand                             |
| teexa                                 | βateexa                                 | ndeexa                                 | teex                                | teex                                |
| tiira                                 | βatiira                                 | ndiira                                 | tiir                                | tiir                                |
| piima                                 | βapiima                                 | mbiima                                 | piim                                | piim                                |
| pakala                                | βapakala                                | mbakala                                | pakal                               | pakal                               |
| ketulula                              | βaketulula                              | ŋgetulula                              | ketulul                             | ketulul                             |
| kona                                  | βakona                                  | ŋgona                                  | kon                                 | kon                                 |
| kula                                  | βakula                                  | ŋgula                                  | kul                                 | kul                                 |
| kwa                                   | βakwa                                   | ŋgwa                                   | kw                                  | kw                                  |

*Rules:*

[ -voice ] → [ +voice ] / [ +nasal ] [ -vowel ]<sub>0</sub>\_

[ +nasal ] → αplace / - [ αplace ]  
 [ -vowel ]

English (in metatheory training set):

| stem | stem+d | stem+z | stem+ɪj | ŪR   | UR   |
|------|--------|--------|---------|------|------|
| ro   | rod    | roz    | rouj    | ro   | ro   |
| fo   | fod    | foz    | fouj    | fo   | fo   |
| cal  | cald   | calz   | calɪj   | cal  | cal  |
| trn  | trnd   | trnz   | trnɪj   | trn  | trn  |
| græb | græbd  | græbz  | græbuɪ  | græb | græb |
| sim  | simd   | simz   | simɪj   | sim  | sim  |
| liv  | livd   | livz   | livɪj   | liv  | liv  |
| mʊv  | mʊvd   | mʊvz   | mʊvɪj   | mʊv  | mʊv  |
| hæg  | hægd   | hægz   | hæguɪ   | hæg  | hæg  |
| lʊk  | lʊkt   | lʊks   | lʊkuɪ   | lʊk  | lʊk  |
| æsk  | æskt   | æskz   | æskuɪ   | æsk  | æsk  |
| wɜrk | wɜrkt  | wɜrks  | wɜrkuɪ  | wɜrk | wɜrk |
| kɪs  | kɪst   | kɪsɪz  | kɪsuɪ   | kɪs  | kɪs  |
| fɪʃ  | fɪʃt   | fɪʃɪz  | fɪʃuɪ   | fɪʃ  | fɪʃ  |
| kwɪz | kwɪzd  | kwɪzɪz | kwɪzuɪ  | kwɪz | kwɪz |
| bʌz  | bʌzd   | bʌzɪz  | bʌzuɪ   | bʌz  | bʌz  |
| wet  | wetəd  | wets   | wetuɪ   | wet  | wet  |
| wed  | wedəd  | wedz   | weduɪ   | wed  | wed  |
| nɪd  | nɪdəd  | nɪdz   | nɪduɪ   | nɪd  | nɪd  |
| lɪft | lɪftəd | lɪfts  | lɪftuɪ  | lɪft | lɪft |

Rules:

$\emptyset \rightarrow \text{ə} / [ +\text{sibilant} ]\_z$

$\emptyset \rightarrow \text{ə} / \left[ \begin{array}{l} -\text{continuant} \\ -\text{sonorant} \\ +\text{coronal} \end{array} \right] \_d$

$[ -\text{vowel} ] \rightarrow [ -\text{voice} ] / [ -\text{voice} ]\_#\text{#}$

Lithuanian (in metatheory training set):

| at+stem+ti | ap+stem+ti             | ŪR                 | UR                 |
|------------|------------------------|--------------------|--------------------|
| ateiti     | –                      | ei                 | ei                 |
| atimti     | –                      | im                 | im                 |
| atnef̥ti   | –                      | nef̥               | nef̥               |
| atleisti   | –                      | leis               | leis               |
| atlikti    | –                      | lik                | lik                |
| atko:pti   | –                      | ko:p               | ko:p               |
| atprafi:ti | –                      | prafi:             | prafi:             |
| atkurti    | –                      | kur                | kur                |
| –          | apeiti                 | ei                 | ei                 |
| –          | apief̥ko:ti            | ief̥ko:            | ief̥ko:            |
| –          | apakti                 | ak                 | ak                 |
| –          | apmo:ki:ti             | mo:ki:             | mo:ki:             |
| –          | aptemdi:ti             | temdi:             | temdi:             |
| –          | apfaukti               | fauk               | fauk               |
| adbekti    | –                      | bek                | bek                |
| adgauti    | –                      | gau                | gau                |
| adbukti    | –                      | buk                | buk                |
| adgimti    | –                      | gim                | gim                |
| –          | abgauti                | gau                | gau                |
| –          | abʒ <sup>l</sup> ureti | ʒ <sup>l</sup> ure | ʒ <sup>l</sup> ure |
| –          | abʒelti                | ʒel                | ʒel                |
| –          | abdauʒi:ti             | dauʒi:             | dauʒi:             |
| –          | abdraski:ti            | draski:            | draski:            |

Rules:

$$[-\text{vowel}] \rightarrow [+voice] / - \left[ \begin{array}{l} -\text{sonorant} \\ +voice \end{array} \right]$$

Armenian (in metatheory training set):

| k+stem+am                                          | ŪR                                               | UR                               |
|----------------------------------------------------|--------------------------------------------------|----------------------------------|
| kert <sup>h</sup> am                               | ert <sup>h</sup>                                 | ert <sup>h</sup>                 |
| kasiem                                             | asi                                              | asi                              |
| kaniem                                             | ani                                              | ani                              |
| kakaniem                                           | akani                                            | akani                            |
| koxniem                                            | oxni                                             | oxni                             |
| kurriem                                            | urri                                             | urri                             |
| kətam                                              | kt                                               | t                                |
| kəkienam                                           | əkien                                            | kien                             |
| gəbəzzam                                           | gbəzz                                            | bəzz                             |
| gəlam                                              | gl                                               | l                                |
| gəzəram                                            | gzər                                             | zər                              |
| k <sup>h</sup> ət <sup>h</sup> uojniem             | k <sup>h</sup> t <sup>h</sup> uejni              | t <sup>h</sup> uojni             |
| k <sup>h</sup> ət <sup>h</sup> ap <sup>h</sup> iem | k <sup>h</sup> t <sup>h</sup> ap <sup>h</sup> i  | t <sup>h</sup> ap <sup>h</sup> i |
| g <sup>h</sup> əb <sup>h</sup> ieriem              | g <sup>h</sup> b <sup>h</sup> ib <sup>h</sup> ri | b <sup>h</sup> iaři              |
| g <sup>h</sup> əg <sup>h</sup> uom                 | g <sup>h</sup> g <sup>h</sup> u                  | g <sup>h</sup> u                 |
| g <sup>h</sup> əd <sup>zh</sup> ieviem             | g <sup>h</sup> d <sup>zh</sup> iavi              | d <sup>zh</sup> iavi             |

Rules:

[ +vowel ] → o / u\_

[ -vowel ] → [ -vowel ]<sub>i</sub> / #\_ [ -vowel ]<sub>i</sub>

[ -vowel ] → ə / [ -vowel ]\_ [ -vowel ]

[ ] → e / i\_



*Axininca Campa* :

| stem    | no+stem+ti  | UR      | UR      |
|---------|-------------|---------|---------|
| toniro  | notoniroti  | toniro  | toniro  |
| jaarato | nojaaratosi | jaarato | jaarato |
| kanari  | nojanariti  | kanari  | kanari  |
| kosiri  | nojosiriti  | kosiri  | kosiri  |
| pisiro  | nowisiroti  | pisiro  | pisiro  |
| porita  | noworitati  | porita  | porita  |

*Rules:*

$k \rightarrow j / [ \quad ]_-$

$p \rightarrow w / [ \quad ]_-$

This problem was manually graded:

- $[-cor] \rightarrow [-cons,+cont,+voi] / V\_V$  (or possibly  $[-cor,-son]$ ). The data is pathological in that the only place where these C's aren't  $V\_V$  is word-initial, and it's cheaper to write "non-initial". Implemented by rules 1 and 2.

No spurious rules.

*Kikuyu* :

| ko+stem+a | UR    | UR    |
|-----------|-------|-------|
| ɣotɛɲera  | tɛɲer | tɛɲer |
| ɣokuua    | kuu   | kuu   |
| ɣokoora   | koor  | koor  |
| koruya    | ruy   | ruy   |
| kooria    | ori   | ori   |
| komeɲa    | mɛɲ   | mɛɲ   |
| kohɔta    | hɔt   | hɔt   |
| ɣotʃina   | tʃin  | tʃin  |
| koyɛera   | yɛer  | yɛer  |
| koina     | in    | in    |
| ɣotʃuuka  | tʃuuk | tʃuuk |
| ɣokaja    | kaj   | kaj   |
| koɣaja    | ɣaj   | ɣaj   |

*Rules:*

$[-\text{vowel}] \rightarrow \gamma / \# \_ [ \begin{array}{l} -\text{low} \\ -\text{voice} \end{array} ]$

$[-\text{vowel}] \rightarrow [ +\text{voice} ] / \_ [ \begin{array}{l} -\text{sonorant} \\ +\text{voice} \end{array} ]$

This problem was manually graded:

- More complex version, expressed as 2 rules:  $k \rightarrow [+voi] / \_V[-\text{voi}, -\text{cont}]$  followed by  $[+dor, +\text{voi}, -\text{son}] \rightarrow [+cont]$  (because the data has no g, only ɣ). Or, more simply (with narrower coverage):  $k \rightarrow \gamma / \_V[-\text{voi}, -\text{cont}]$ . This is implemented by the first model output rule. Model rule 1 “incorrectly” changes all C’s to ɣ, because there’s no other data. Can’t really fault it for that.

Rule 2 is spurious.

Korean (in metatheory training set):

| stem+ə             | stem+ko             | ŨR                | UR                |
|--------------------|---------------------|-------------------|-------------------|
| ipə                | ipko                | ip                | ip                |
| kupə               | kupko               | kup               | kup               |
| kap <sup>h</sup> a | kapko               | kap <sup>h</sup>  | kap <sup>h</sup>  |
| cip <sup>h</sup> ə | cipko               | cip <sup>h</sup>  | cip <sup>h</sup>  |
| tata               | tatko               | tat               | tat               |
| put <sup>h</sup> ə | putko               | put <sup>h</sup>  | put <sup>h</sup>  |
| məkə               | məkko               | mək               | mək               |
| t <sup>ʃ</sup> ukə | t <sup>ʃ</sup> ukko | t <sup>ʃ</sup> uk | t <sup>ʃ</sup> uk |
| ikə                | ikko                | ik                | ik                |
| takə               | takko               | tak               | tak               |
| kəkə               | kəkko               | kək               | kək               |
| səkə               | səkko               | sək               | sək               |

Rules:

[ -sonorant ] → [ -aspirated ] / \_ [ -sonorant ]

[ +voice ] → [ +low ]<sub>i</sub> / [ +low ]<sub>i</sub> [ -vowel ] \_

Yowlumne :

| stem+hin  | stem+ka  | stem+al  | stem+it  | ŪR     | UR           |
|-----------|----------|----------|----------|--------|--------------|
| xathin    | xatka    | xatal    | xatit    | xat    | xat          |
| dubhun    | dubka    | dubal    | dubut    | dib    | deb          |
| xilhin    | xilka    | xilal    | xilit    | xil    | xil          |
| koʔhin    | koʔko    | koʔol    | koʔit    | koʔ    | koʔ          |
| doshin    | dosko    | do:sol   | do:sit   | do:s   | do:s         |
| ʃaphin    | ʃapka    | ʃa:pal   | ʃa:pit   | ʃa:p   | ʃa:p         |
| lanhin    | lanka    | la:mal   | la:mit   | la:m   | la:m         |
| mekhin    | mekka    | me:kal   | me:kit   | me:k   | me:k         |
| wonhin    | wonko    | wo:nol   | wo:nit   | wo:n   | wo:n         |
| paxathin  | paxatka  | paxa:tal | paxa:tit | paxa:t | paxa:t       |
| hiwethin  | hiwetka  | hiwe:tal | hiwe:tit | hiwe:t | hiwe:t       |
| ?opothin  | ?opotko  | ?opo:tol | ?opo:tit | ?opo:t | ?opo:t       |
| jawalhin  | jawalka  | java:lal | java:lit | java:l | java:l       |
| paʔiʔhin  | paʔiʔka  | paʔʔal   | paʔʔit   | paʔt   | paʔt/paʔiʔt  |
| ?ilikhin  | ?ilikka  | ?ilikal  | ?ilikit  | ?ilk   | ?ilik/?ilk   |
| logiwhin  | logiwka  | logwol   | logwit   | logw   | logiw/logw   |
| ?ugunhun  | ?ugunka  | ?ugnal   | ?ugnit   | ?ugn   | ?ugun/?ugn   |
| lihimhin  | lihimka  | lihm(al) | lihmit   | lihm   | lihm/lihim   |
| ?ajjihin  | ?ajjika  | ?ajjal   | ?ajjit   | ?ajj   | ?ajj/?ajj    |
| tojixhin  | tojixka  | tojxol   | tojxit   | tojx   | tojix/tojx   |
| lukulhun  | lukulka  | luklal   | luklut   | lukl   | lukl/lukul   |
| so:mlhin  | so:mlka  | sonlol   | sonlit   | so:ml  | so:ml/so:ml  |
| ?a:mlhin  | ?a:mlka  | ?amlal   | ?amlit   | ?a:ml  | ?a:ml/?a:ml  |
| mo:jinhin | mo:jinka | mo:jnol  | mo:jnit  | mo:jn  | mo:jn/mo:jn  |
| ʃa:likhin | ʃa:likka | ʃalkal   | ʃalkit   | ʃa:lk  | ʃa:lk/ʃa:lik |

Rules:

$\emptyset \rightarrow i / [ \text{-vowel} ] \_ [ \text{-vowel} ] [ \text{-vowel} ]$

$a \rightarrow o / \left[ \begin{array}{l} +\text{rounded} \\ -\text{high} \end{array} \right] [ \text{-vowel} ]_{0\_}$

$\left[ \begin{array}{l} -\text{back} \\ +\text{vowel} \end{array} \right] \rightarrow u / u [ \quad ]_{0\_}$

$[ \quad ] \rightarrow u / \left[ \begin{array}{l} -\text{sonorant} \\ +\text{voice} \end{array} \right] [ \text{-voice} ]_{0\_} [ \text{-continuant} ]$

$[ \quad ] \rightarrow [ \text{-long} ] / \_ [ \text{-vowel} ] [ \text{-vowel} ]$

This problem was manually graded:

- vowel epenthesis:  $\emptyset \rightarrow i / C\_CC$  (must precede rounding harmony, must precede vowel shortening). Model implements this with rule 1
- rounding harmony:  $[\alpha \text{ high}] \rightarrow [\beta \text{ round}] / [\alpha \text{ high}, \beta \text{ round}] C_{0\_}$  (must follow epenthesis) (high vowels match preceding high in rounding (dub-hin→dubhun), non-high match preceding non-high in rounding (do:s-al→do:sol). Model gets these with rules 2 and 3 (model: front becomes round, not falsified because data has no examples of uC<sub>0</sub>e)
- vowel shortening:  $V: \rightarrow V / \_CC$ . Model implements this with rule 5

Rule 4 is spurious.

Hungarian (in metatheory training set):

| stem                | stem+ban                | stem+to:l                | stem+nak                | ŪR                  | UR                  |
|---------------------|-------------------------|--------------------------|-------------------------|---------------------|---------------------|
| kalap               | kalabban                | kalapto:l                | kalapnak                | kalap               | kalap               |
| kurt                | kurdban                 | kurtto:l                 | kurtnak                 | kurt                | kurt                |
| ʒa:k                | ʒa:gban                 | ʒa:ktö:l                 | ʒa:knak                 | ʒa:k                | ʒa:k                |
| re:s                | rezben                  | re:stö:l                 | re:snak                 | re:s                | re:s                |
| ʃro:f               | ʃro:vban                | ʃro:ftö:l                | ʃro:fnak                | ʃro:f               | ʃro:f               |
| laka:f              | laka:ʒban               | laka:ftö:l               | laka:fnak               | laka:f              | laka:f              |
| ketret <sup>s</sup> | ketred <sup>2</sup> ben | ketret <sup>s</sup> tö:l | ketret <sup>s</sup> nek | ketret <sup>s</sup> | ketrat <sup>s</sup> |
| test                | tezdben                 | testtö:l                 | testnek                 | tezt                | test                |
| rab                 | rabban                  | raptö:l                  | rabnak                  | rab                 | rab                 |
| ka:d                | kardban                 | ka:ttö:l                 | ka:dnak                 | ka:d                | ka:d                |
| meleg               | melegben                | melektö:l                | melegnek                | melag               | melag               |
| vi:z                | vizben                  | vi:stö:l                 | viznek                  | vi:z                | vi:z                |
| vara:ʒ              | vara:ʒban               | vara:ʒtö:l               | vara:ʒnak               | vara:ʒ              | vara:ʒ              |
| a:g <sup>j</sup>    | a:g <sup>j</sup> ban    | a:k <sup>1</sup> tö:l    | a:g <sup>j</sup> nak    | a:g <sup>j</sup>    | a:g <sup>j</sup>    |
| sem                 | semben                  | semtö:l                  | semnek                  | sem                 | sem                 |
| bün                 | bünben                  | büntö:l                  | bünnek                  | bün                 | bün                 |
| toroñ               | toroñban                | toroñtö:l                | toroñnak                | toroñ               | toroñ               |
| fal                 | falban                  | faltö:l                  | falnak                  | fal                 | fal                 |
| ör                  | örben                   | örtö:l                   | örnek                   | ör                  | ör                  |
| sa:j                | sa:jbán                 | sa:jtö:l                 | sa:jnak                 | sa:j                | sa:j                |

Rules:

$$[ +\text{vowel} ] \rightarrow \left[ \begin{array}{l} -\text{back} \\ -\text{low} \end{array} \right] / \left[ \begin{array}{l} -\text{back} \\ +\text{vowel} \end{array} \right] [ \quad ]_{0-}$$

$$[ -\text{vowel} ] \rightarrow [ +\text{voice} ] / - \left[ \begin{array}{l} -\text{sonorant} \\ +\text{voice} \end{array} \right]$$

$$[ -\text{sonorant} ] \rightarrow [ -\text{voice} ] / - [ -\text{voice} ]$$

*Kikuria (in metatheory training set):*

| stem+a               | stem+era               | ŨR                  | UR                  |
|----------------------|------------------------|---------------------|---------------------|
| suraajga             | suraajgera             | suraajg             | suraajg             |
| taajgata             | taajgatera             | taajgat             | taajgat             |
| baamba               | baambera               | baamb               | baamb               |
| reenda               | reendera               | riend               | reend               |
| rema                 | remera                 | rem                 | rem                 |
| hoora                | hoorera                | hoor                | hoor                |
| roma                 | romera                 | rom                 | rom                 |
| sooka                | sookera                | sook                | sook                |
| tat <sup>f</sup> ora | tat <sup>f</sup> orera | tat <sup>f</sup> or | tat <sup>f</sup> or |
| siika                | seekera                | siik                | siik                |
| tiga                 | tegera                 | tig                 | tig                 |
| ruga                 | rogera                 | rug                 | rug                 |
| suka                 | sokera                 | suk                 | suk                 |
| huuta                | hootera                | huut                | huut                |
| riijga               | reejgera               | riijg               | riijg               |
| siinda               | seendera               | siind               | siind               |

*Rules:*

[ +vowel ] → [ -high ] / \_[ -liquid ]<sub>0</sub> e

Farsi :

| stem                              | stem+an                              | $\hat{U}R$                         | UR                                 |
|-----------------------------------|--------------------------------------|------------------------------------|------------------------------------|
| zæn                               | zænan                                | zæn                                | zæn                                |
| læb                               | læban                                | læb                                | læb                                |
| hæsud                             | hæsudan                              | hæsud                              | hæsud                              |
| bæradær                           | bæradæran                            | bæradær                            | bæradær                            |
| bozorg                            | bozorgan                             | bozorg                             | bozorg                             |
| mæleke                            | mælekean                             | mæleke                             | mæleke                             |
| valede                            | valedean                             | valede                             | valede                             |
| kæbire                            | kæbirean                             | kæbire                             | kæbire                             |
| ahu                               | ahuan                                | ahu                                | ahu                                |
| hamele                            | hamelean                             | hamele                             | hamele                             |
| bat <sup>f</sup> t <sup>f</sup> e | bat <sup>f</sup> t <sup>f</sup> egan | bat <sup>f</sup> t <sup>f</sup> eg | bat <sup>f</sup> t <sup>f</sup> eg |
| setare                            | setaregan                            | setareg                            | setareg                            |
| bænde                             | bændegan                             | bændeg                             | bændeg                             |
| azade                             | azadegan                             | azadeg                             | azadeg                             |
| divane                            | divanegan                            | divaneg                            | divaneg                            |

Rules:

[ -vowel ]  $\rightarrow \emptyset / e_{\#}$

This problem was manually graded:

- g-deletion:  $g \rightarrow \emptyset / V_{\#}$  (or  $e_{\#}$ ). Model rule 1 implements this process.

No spurious rules.

Tibetan (in metatheory training set):

| stem              | bd <sup>3</sup> u+stem             | stem+bd <sup>3</sup> u | ŨR                 | UR                 |
|-------------------|------------------------------------|------------------------|--------------------|--------------------|
| d <sup>3</sup> u  | –                                  | –                      | bd <sup>3</sup> u  | bd <sup>3</sup> u  |
| d <sup>3</sup> ig | d <sup>3</sup> ugd <sup>3</sup> ig | –                      | gd <sup>3</sup> ig | gd <sup>3</sup> ig |
| fi                | d <sup>3</sup> ubfi                | fibd <sup>3</sup> u    | bfi                | bfi                |
| gu                | d <sup>3</sup> urgu                | gubd <sup>3</sup> u    | rgu                | rgu                |
| ŋa                | d <sup>3</sup> uŋa                 | ŋabd <sup>3</sup> u    | ŋa                 | ŋa                 |

Rules:

[ -vowel ] → ∅ / #\_ [ -vowel ]



Makonde (in metatheory training set):

| stem+áŋga | stem+íle | stem+a | ŪR  | UR  |
|-----------|----------|--------|-----|-----|
| amáŋga    | amíle    | áma    | ám  | ám  |
| taváŋga   | tavíle   | táva   | táv | táv |
| akáŋga    | akíle    | áka    | ák  | ák  |
| patáŋga   | patíle   | póta   | pót | pót |
| tatáŋga   | tatíle   | tóta   | tót | tót |
| dabáŋga   | dabíle   | dóba   | dób | dób |
| aváŋga    | avíle    | óva    | óv  | óv  |
| amáŋga    | amíle    | óma    | óm  | óm  |
| tapáŋga   | tapíle   | tépa   | tép | tép |
| patáŋga   | patíle   | péta   | pét | pét |
| aváŋga    | avíle    | éva    | év  | év  |
| babáŋga   | babíle   | béba   | béb | béb |
| utáŋga    | utíle    | úta    | út  | út  |
| lukáŋga   | lukíle   | lúka   | lúk | lúk |
| lumáŋga   | lumíle   | lúma   | lúm | lúm |
| uŋgáŋga   | uŋgíle   | úŋga   | úŋg | úŋg |
| iváŋga    | ivíle    | íva    | ív  | ív  |
| pitáŋga   | pitíle   | píta   | pít | pít |
| imbáŋga   | imbíle   | ímba   | ímb | ímb |
| limáŋga   | limíle   | líma   | lím | lím |

Rules:

$$\left[ \begin{array}{l} +\text{continuant} \\ -\text{high} \end{array} \right] \rightarrow a / \_ [ -\text{vowel} ] \left[ \begin{array}{l} +\text{stress} \\ +\text{vowel} \end{array} \right]$$

$$[ +\text{vowel} ] \rightarrow [ -\text{stress} ] / \_ [ -\text{vowel} ]_0 \left[ \begin{array}{l} +\text{stress} \\ +\text{vowel} \end{array} \right]$$

North Saami :

| stem                               | stem+in                              | ŪR                                 | UR                                 |
|------------------------------------|--------------------------------------|------------------------------------|------------------------------------|
| varit                              | varihin                              | varih                              | varih                              |
| oahpis                             | oahpisin                             | oahpis                             | oahpis                             |
| tʰoarvuf                           | tʰoarvufin                           | tʰoarvuf                           | tʰoarvuf                           |
| lottaaf                            | lottaad <sup>5</sup> in              | lottaad <sup>5</sup>               | lottaad <sup>5</sup>               |
| tʰuoivvat                          | tʰuoivvagin                          | tʰuoivvag                          | tʰuoivvag                          |
| ahhkut                             | ahhkubin                             | ahhkub                             | ahhkub                             |
| suohkat                            | suohkaðin                            | suohkað                            | suohkað                            |
| heed <sup>5</sup> of               | heed <sup>5</sup> od <sup>5</sup> in | heed <sup>5</sup> od <sup>5</sup>  | heed <sup>5</sup> od <sup>5</sup>  |
| aad <sup>5</sup> d <sup>5</sup> ut | aad <sup>5</sup> d <sup>5</sup> ubin | aad <sup>5</sup> d <sup>5</sup> ub | aad <sup>5</sup> d <sup>5</sup> ub |
| bissobeahrtset                     | bissobeahrtsehin                     | bissobeahrtseh                     | bissobeahrtseh                     |
| tʰeahtsit                          | tʰeahtsibin                          | tʰeahtsib                          | tʰeahtsib                          |
| jaaʔmin                            | jaaʔmimin                            | jaaʔmim                            | jaaʔmim                            |
| tʰuoivat                           | tʰuoivagin                           | tʰuoivag                           | tʰuoivag                           |
| laagef                             | laaged <sup>5</sup> in               | laaged <sup>5</sup>                | laaged <sup>5</sup>                |
| gahpir                             | gahpirin                             | gahpir                             | gahpir                             |
| gaahtsis                           | gaahtsisin                           | gaahtsis                           | gaahtsis                           |
| aaslat                             | aaslagin                             | aaslag                             | aaslag                             |
| baðoofgaattset                     | baðoofgaattsebin                     | baðoofgaattseb                     | baðoofgaattseb                     |
| ahhkit                             | ahhkiðin                             | ahhkið                             | ahhkið                             |
| bahaanaalat                        | bahaanaalagin                        | bahaanaalag                        | bahaanaalag                        |
| beftor                             | beftorin                             | beftor                             | beftor                             |
| heevemeahhtun                      | heevemeahhtumin                      | heevemeahhtun                      | heevemeahhtun                      |
| beed <sup>5</sup> ot               | beed <sup>5</sup> ohin               | beed <sup>5</sup> oh               | beed <sup>5</sup> oh               |
| bissomeahhtun                      | bissomeahhtumin                      | bissomeahhtun                      | bissomeahhtun                      |
| laðas                              | laðasin                              | laðas                              | laðas                              |
| heaijusmielat                      | heaijusmielagin                      | heaijusmielag                      | heaijusmielag                      |
| heajkkan                           | heajkkanin                           | heajkkan                           | heajkkan                           |
| jaman                              | jamanin                              | jaman                              | jaman                              |

Rules:

$$\left[ \begin{array}{l} \text{-liquid} \\ \text{-nasal} \\ \text{-sibilant} \end{array} \right] \rightarrow t / \_ \#$$

$$[ \text{-vowel} ] \rightarrow [ \text{+coronal} ] / \_ \#$$

$$\left[ \begin{array}{l} \text{-sonorant} \\ \text{+voice} \end{array} \right] \rightarrow \int / \_ \#$$

This problem was manually graded:

- coda place neutralization: [-syl] → [+cor] / \_#
- final devoicing: [-son] → [-voi] / \_# (possibly also intervocalic voicing: [-son, -cont] → [+voi] / V\_V; but perhaps redundant with final devoicing)
- coda manner neutralization: [-son, astring] → [acont] / \_#. i.e. stridents → s,ʃ, non-stridents → t (could be two rules)

According to grader, the model's outputs simulate the above processes, modulo differences in the feature system and lack of variable binding on features. No spurious rules.

*Kerewe (in metatheory training set):*

| ku+<br>stem<br>+a | ku+<br>stem<br>+ana | ku+<br>stem<br>+ila | ku+<br>stem<br>+ilana | kutú+<br>stem<br>+a | kukí+<br>stem<br>+a | kutú+<br>stem<br>+ila | kukítú+<br>stem<br>+ila | ÛR  | UR  |
|-------------------|---------------------|---------------------|-----------------------|---------------------|---------------------|-----------------------|-------------------------|-----|-----|
| kubala            | kubalana            | kubalila            | kubalilana            | kutúbála            | kukíbála            | kutúbálila            | kukítúbalila            | bal | bal |
| kugaja            | kugajana            | kugajila            | kugajilana            | kutúgája            | kukígája            | kutúgájila            | kukítúgajila            | gaj | gaj |
| kugula            | kugulana            | kugulila            | kugulilana            | kutúgúla            | kukígúla            | kutúgúlila            | kukítúgulila            | gul | gul |
| kubála            | kubálána            | kubálíla            | kubálíilana           | kutúbála            | kukíbála            | kutúbálila            | kukítúbalila            | bál | bál |
| kulúma            | kulúmána            | kulúmíla            | kulúmíilana           | kutúlúma            | kukílúma            | kutúlúmila            | kukítúlumila            | lúm | lúm |
| kusúna            | kusúnána            | kusúníla            | kusúníilana           | kutúsúna            | kukísúna            | kutúsúnila            | kukítúsunila            | sún | sún |
| kulába            | kulábána            | kulábíla            | kulábíilana           | kutúlába            | kukílába            | kutúlábila            | kukítúlabila            | láb | láb |

*Rules:*

[ +voice ] → [ -highTone ] / [ +highTone ] [ -vowel ]\_

[ +vowel ] → [ +highTone ] / [ +highTone  
+vowel ] [ -vowel ]<sub>0</sub>[-vowel ]

Polish :

| stem  | stem+i | ŨR    | UR    |
|-------|--------|-------|-------|
| klup  | klubi  | klub  | klub  |
| trup  | trupi  | trup  | trup  |
| dom   | domi   | dom   | dom   |
| snop  | snopi  | snop  | snop  |
| zwup  | zwobi  | zwob  | zwob  |
| trut  | trudi  | trud  | trud  |
| dzvon | dzvoni | dzvon | dzvon |
| kot   | koti   | kot   | kot   |
| lut   | lodi   | lod   | lod   |
| grus  | gruzi  | gruz  | gruz  |
| nos   | nosi   | nos   | nos   |
| vus   | vozi   | voz   | voz   |
| wuk   | wugi   | wug   | wug   |
| wuk   | wuki   | wuk   | wuk   |
| sok   | soki   | sok   | sok   |
| ruk   | rogi   | rog   | rog   |
| bur   | bori   | bor   | bor   |
| vuw   | vowi   | vow   | vow   |
| sul   | sol    | sol   | sol   |
| buj   | boji   | boj   | boj   |
| fum   | fumi   | fum   | fum   |
| zur   | zuri   | zur   | zur   |

Rules:

$[ +\text{vowel} ] \rightarrow \text{u} / \_ \left[ \begin{array}{l} -\text{nasal} \\ +\text{voice} \end{array} \right] \#$

$[ -\text{sonorant} ] \rightarrow [ -\text{voice} ] / \_ \#$

This problem was manually graded:

- o-raising:  $\text{o} \rightarrow [+high] / \_ [+voi, -nas] \#$  (ordered before final devoicing). Model implements this with rule 1.
- Final devoicing:  $[-son] \rightarrow [-voi] / \_ \#$  (ordered after o-raising). Model implements this with rule 2.

No spurious rules.

Ancient Greek (in metatheory training set):

| stem+s               | stem+os                  | stem+i                  | stem+si                | ŨR                    | UR                    |
|----------------------|--------------------------|-------------------------|------------------------|-----------------------|-----------------------|
| hals                 | halos                    | hali                    | halsi                  | hal                   | hal                   |
| ojs                  | ojos                     | oji                     | ojsi                   | oj                    | oj                    |
| sus                  | suos                     | sui                     | susi                   | su                    | su                    |
| klo:ps               | klo:pos                  | klo:pi                  | klo:psi                | klo:p                 | klo:p                 |
| p <sup>h</sup> le:ps | p <sup>h</sup> le:bos    | p <sup>h</sup> le:bi    | p <sup>h</sup> le:psi  | p <sup>h</sup> le:b   | p <sup>h</sup> le:b   |
| kate:lips            | kate:lip <sup>h</sup> os | kate:lip <sup>h</sup> i | kate:lipsi             | kate:lip <sup>h</sup> | kate:lip <sup>h</sup> |
| p <sup>h</sup> ulaks | p <sup>h</sup> ulakos    | p <sup>h</sup> ulaki    | p <sup>h</sup> ulaksi  | p <sup>h</sup> ulak   | p <sup>h</sup> ulak   |
| ajks                 | ajgos                    | ajgi                    | ajksi                  | ajg                   | ajg                   |
| salpiŋks             | salpiŋgos                | salpiŋgi                | salpiŋksi              | salpiŋg               | salpiŋg               |
| onuks                | onuk <sup>h</sup> os     | onuk <sup>h</sup> i     | onuksi                 | onuk <sup>h</sup>     | onuk <sup>h</sup>     |
| t <sup>h</sup> e:is  | t <sup>h</sup> e:tos     | t <sup>h</sup> e:ti     | t <sup>h</sup> e:si    | t <sup>h</sup> e:t    | t <sup>h</sup> e:t    |
| k <sup>h</sup> aris  | k <sup>h</sup> aritos    | k <sup>h</sup> ariti    | k <sup>h</sup> arisi   | k <sup>h</sup> arit   | k <sup>h</sup> arit   |
| elpis                | elpidos                  | elpidi                  | elpisi                 | elpid                 | elpid                 |
| korus                | korut <sup>h</sup> os    | korut <sup>h</sup> i    | korusi                 | korut <sup>h</sup>    | korut <sup>h</sup>    |
| ris                  | ri:nos                   | ri:ni                   | ri:si                  | ri:n                  | ri:n                  |
| delp <sup>h</sup> is | delp <sup>h</sup> i:mos  | delp <sup>h</sup> i:mi  | delp <sup>h</sup> i:si | delp <sup>h</sup> i:m | delp <sup>h</sup> i:m |

Rules:

$\left[ \begin{array}{l} +\text{anterior} \\ +\text{coronal} \end{array} \right] \rightarrow \emptyset / -[ -\text{vowel} ]$

$[ -\text{sonorant} ] \rightarrow \left[ \begin{array}{l} -\text{aspirated} \\ -\text{voice} \end{array} \right] / -[ -\text{sonorant} ]$

Catalan (in metatheory training set):

| stem      | stem+ə     | ŪR        | UR        |
|-----------|------------|-----------|-----------|
| əkɛlj     | əkɛljə     | əkɛlj     | əkɛlj     |
| mal       | malə       | mal       | mal       |
| sɪβil     | sɪβilə     | sɪβil     | sɪβil     |
| əskɛrp    | əskɛrpə    | əskɛrp    | əskɛrp    |
| fɔp       | fɔpə       | fɔp       | fɔp       |
| sɛk       | sɛkə       | sɛk       | sɛk       |
| əspɛs     | əspɛsə     | əspɛs     | əspɛs     |
| ɡros      | ɡrosə      | ɡros      | ɡros      |
| baf       | bafə       | baf       | baf       |
| kɔf       | kɔfə       | kɔf       | kɔf       |
| tot       | totə       | tot       | tot       |
| brut      | brutə      | brut      | brut      |
| pɔk       | pɔkə       | pɔk       | pɔk       |
| prəsis    | prəsisə    | prəsis    | prəsis    |
| frənsez   | frənsezə   | frənsez   | frənsez   |
| ɡriz      | ɡrizə      | ɡriz      | ɡriz      |
| kəzət     | kəzətə     | kəzət     | kəzət     |
| bwid      | bwidə      | bwid      | bwid      |
| rɔtʃ      | rɔtʃə      | rɔdʃ      | rɔdʃ      |
| botʃ      | botʃə      | bodʃ      | bodʃ      |
| ɔrp       | ɔrpə       | orb       | orb       |
| ljark     | ljarkə     | ljarg     | ljarg     |
| sɛk       | sɛkə       | seg       | seg       |
| fəfuk     | fəfukə     | fəfug     | fəfug     |
| ɡrɔk      | ɡrɔkə      | ɡrɔg      | ɡrɔg      |
| puruk     | purukə     | purug     | purug     |
| kandit    | kanditə    | kandid    | kandid    |
| frɛt      | frɛtə      | frɛd      | frɛd      |
| səyur     | səyurə     | səyur     | səyur     |
| dur       | durə       | dur       | dur       |
| səyədɔr   | səyədɔrə   | səyədɔr   | səyədɔr   |
| klar      | klarə      | klar      | klar      |
| nu        | nuə        | nu        | nu        |
| kru       | kruə       | kru       | kru       |
| flɔndʃu   | flɔndʃuə   | flɔndʃu   | flɔndʃu   |
| drɔpu     | drɔpə      | drɔpu     | drɔpu     |
| əgzaktə   | əgzaktə    | əgzaktə   | əgzaktə   |
| əlβin     | əlβinə     | əlβin     | əlβin     |
| sa        | sanə       | san       | san       |
| plə       | plənə      | plan      | plan      |
| bo        | bonə       | bon       | bon       |
| sərən     | sərənə     | sərən     | sərən     |
| sufɫim    | sufɫimə    | sufɫim    | sufɫim    |
| alt       | altə       | alt       | alt       |
| fɔrt      | fɔrtə      | fɔrt      | fɔrt      |
| kurt      | kurtə      | kurt      | kurt      |
| sɔrd      | sɔrdə      | sɔrd      | sɔrd      |
| bɛrd      | bɛrdə      | bɛrd      | bɛrd      |
| sant      | santə      | sant      | sant      |
| kələnt    | kələntə    | kələnt    | kələnt    |
| prufund   | prufundə   | prufund   | prufund   |
| fəkund    | fəkundə    | fəkund    | fəkund    |
| dəsɛnt    | dəsɛntə    | dəsɛnt    | dəsɛnt    |
| dulent    | dulentə    | dulent    | dulent    |
| əstuɔiant | əstuɔiantə | əstuɔiant | əstuɔiant |
| blajk     | blajkə     | blajk     | blajk     |

*Rules:*

[ -sonorant ] → [ -voice ] / \_#

t → ñ / [ -vowel ]\_#

$\left[ \begin{array}{l} \text{-sonorant} \\ \text{+voice} \end{array} \right] \rightarrow [ \text{+continuant} ] / [ \text{-nasal} ]_-[ \text{+vowel} ]$

$\left[ \begin{array}{l} \text{-lateral} \\ \text{+sonorant} \\ \text{+coronal} \end{array} \right] \rightarrow \emptyset / \_#$

[ +vowel ] → ∅ / [ -sonorant ]\_∅

[ +nasal ] → k / [ -vowel ]\_∅

Serbo-Croatian (in metatheory training set):

| stem    | stem+a   | stem+o   | stem+i   | stem+em | stem+l | stem+la | stem+ló | ŪR      | UR      |
|---------|----------|----------|----------|---------|--------|---------|---------|---------|---------|
| križan  | križana  | križano  | križani  | –       | –      | –       | –       | križan  | križan  |
| suntʃan | suntʃana | suntʃano | suntʃani | –       | –      | –       | –       | suntʃan | suntʃan |
| svetʃan | svetʃana | svetʃano | svetʃani | –       | –      | –       | –       | svetʃan | svetʃan |
| bogat   | bogata   | bogato   | bogati   | –       | –      | –       | –       | bogat   | bogat   |
| rapav   | rapava   | rapavo   | rapavi   | –       | –      | –       | –       | rapav   | rapav   |
| mlád    | mladá    | mladó    | mladí    | –       | –      | –       | –       | mlád    | mlád    |
| túp     | tupá     | tupó     | tupí     | –       | –      | –       | –       | túp     | túp     |
| blág    | blagá    | blagó    | blagi    | –       | –      | –       | –       | blág    | blág    |
| grúb    | grubá    | grubó    | grubí    | –       | –      | –       | –       | grúb    | grúb    |
| béo     | belá     | beló     | belí     | –       | –      | –       | –       | bél     | bél     |
| veseo   | vesela   | veselo   | veseli   | –       | –      | –       | –       | vesel   | vesel   |
| debéo   | debelá   | debeló   | debelí   | –       | –      | –       | –       | débél   | debél   |
| mío     | milá     | miló     | milí     | –       | –      | –       | –       | míl     | míl     |
| zelén   | zelená   | zelenó   | zelení   | –       | –      | –       | –       | zelén   | zelén   |
| kradén  | kradená  | kradenó  | kradení  | –       | –      | –       | –       | kradén  | kradén  |
| dalék   | daleká   | dalekó   | dalekí   | –       | –      | –       | –       | dálek   | dalék   |
| visók   | visoká   | visokó   | visokí   | –       | –      | –       | –       | vísók   | visók   |
| dubók   | duboká   | dubokó   | dubokí   | –       | –      | –       | –       | dúbók   | dubók   |
| jásan   | jasná    | jasnó    | jasní    | –       | –      | –       | –       | jásn    | jásn    |
| vážan   | vazná    | vaznó    | vazní    | –       | –      | –       | –       | vážn    | vážn    |
| sítan   | sitná    | sitnó    | sitní    | –       | –      | –       | –       | sítan   | sítan   |
| ledan   | ledna    | ledno    | ledni    | –       | –      | –       | –       | ledn    | ledn    |
| tának   | tanká    | tankó    | tankí    | –       | –      | –       | –       | tánk    | tánk    |
| krátak  | kratká   | kratkó   | kratkí   | –       | –      | –       | –       | krátk   | krátk   |
| blízak  | bliská   | bliskó   | bliskí   | –       | –      | –       | –       | blízk   | blízk   |
| úzak    | uská     | uskó     | uskí     | –       | –      | –       | –       | úzk     | úzk     |
| dóbar   | dobrá    | dobró    | dobrí    | –       | –      | –       | –       | dóbr    | dóbr    |
| óftar   | oftrá    | oftró    | oftrí    | –       | –      | –       | –       | óftr    | óftr    |
| bodar   | bodra    | bodro    | bodri    | –       | –      | –       | –       | bodr    | bodr    |
| ustao   | ustala   | ustalo   | ustali   | –       | –      | –       | –       | ustal   | ustal   |
| múkao   | muklá    | mukló    | muklí    | –       | –      | –       | –       | múkl    | múkl    |
| óbao    | oblá     | obló     | oblí     | –       | –      | –       | –       | óbl     | óbl     |
| pódao   | podlá    | podló    | podlí    | –       | –      | –       | –       | pódl    | pódl    |
| –       | –        | –        | –        | tépém   | tépao  | teplá   | tepló   | tép     | tép     |
| –       | –        | –        | –        | skubém  | skúbao | skublá  | skubló  | skúb    | zkúb    |
| –       | –        | –        | –        | tresém  | trésao | treslá  | tresló  | trés    | trés    |
| –       | –        | –        | –        | vezém   | vézao  | vezlá   | vezló   | véz     | véz     |

Rules:

[ +vowel ] → [ +stress ] / [ +stress  
+vowel ] [ ]<sub>0</sub>–

[ +vowel ] → [ -stress ] / –[ -vowel ]<sub>0</sub> [ +stress  
+vowel ]

∅ → a / [ -vowel ]–[ -vowel ] #

[ -sonorant ] → [ -voice ] / –[ -sonorant ]

l → o / \_#



Russian (in metatheory training set):

| stem       | stem+a      | ŪR         | UR         |
|------------|-------------|------------|------------|
| vagon      | vagona      | vagon      | vagon      |
| avtomobilʲ | avtomobilʲa | avtomobilʲ | avtomobilʲ |
| vetʲer     | vetʲera     | vetʲer     | vetʲer     |
| muʃ        | muʃa        | muʃ        | muʃ        |
| karandaʃ   | karandaʃa   | karandaʃ   | karandaʃ   |
| glas       | glaza       | glaz       | glaz       |
| golos      | golosa      | golos      | golos      |
| ras        | raza        | raz        | raz        |
| les        | lesa        | les        | les        |
| porok      | poroga      | porog      | porog      |
| vrak       | vraga       | vrag       | vrag       |
| urok       | uroka       | urok       | urok       |
| porok      | poroka      | porok      | porok      |
| tʲvet      | tʲveta      | tʲvet      | tʲvet      |
| prut       | pruda       | prud       | prud       |
| soldat     | soldata     | soldat     | soldat     |
| zavot      | zavoda      | zavod      | zavod      |
| xlep       | xleba       | xleb       | xleb       |
| grib       | griba       | grib       | grib       |
| trup       | trupa       | trup       | trup       |

Rules:

[ -sonorant ] → [ -voice ] / \_#

Finnish :

| stem     | stem+a    | ŪR       | UR       |
|----------|-----------|----------|----------|
| aamu     | aamua     | aamu     | aamu     |
| hopea    | hopeaa    | hopea    | hopea    |
| katto    | kattoa    | katto    | katto    |
| kello    | kelloa    | kello    | kello    |
| kirja    | kirjaa    | kirja    | kirja    |
| külmæ    | külmææ    | külmæ    | külmæ    |
| koulu    | koulua    | koulu    | koulu    |
| lintu    | lintua    | lintu    | lintu    |
| hüllü    | hüllüæ    | hüllü    | hüllü    |
| kömpelö  | kömpelöæ  | kömpelö  | kömpelö  |
| nækö     | næköæ     | nækö     | nækö     |
| joki     | jokea     | joke     | joke     |
| kivi     | kiveæ     | kive     | kive     |
| muuri    | muuria    | muuri    | muuri    |
| naapuri  | naapuria  | naæpuri  | naæpuri  |
| nimi     | nimeæ     | nime     | nime     |
| kaappi   | kaappia   | kaappi   | kaappi   |
| kaikki   | kaikkea   | kaikke   | kaikke   |
| kiirehti | kiirehtiæ | kiirehti | kiirehti |
| lehti    | lehteæ    | lehte    | lehte    |
| mæki     | mækeæ     | mæke     | mæke     |
| ovi      | ovea      | ove      | ove      |
| posti    | postia    | posti    | posti    |
| tukki    | tukkia    | tukki    | tukki    |
| æiti     | æitiæ     | æiti     | æiti     |
| englanti | englantia | englanti | englanti |
| jærvi    | jærveæ    | jærve    | jærve    |
| koski    | koskea    | koske    | koske    |
| reki     | rekeæ     | reke     | reke     |
| væki     | vækeæ     | væke     | væke     |

Rules:

$[ \quad ] \rightarrow \left[ \begin{array}{l} \text{-back} \\ \text{+vowel} \end{array} \right] / +_-$

$\text{æ} \rightarrow \text{a} / \left[ \begin{array}{l} \text{+back} \\ \text{+tense} \end{array} \right] [ \quad ]_0-$

$\text{e} \rightarrow \text{i} / \_ \#$

*Kerewe (in metatheory training set):*

| ku+stem+a              | m+stem+a              | a+stem+a              | stem+a               | UR                 | UR                 |
|------------------------|-----------------------|-----------------------|----------------------|--------------------|--------------------|
| kupaamba               | mpaamba               | apaamba               | paamba               | paamb              | paamb              |
| kupaangga              | mpaangga              | apaangga              | paangga              | paang              | paang              |
| kupima                 | mpima                 | apima                 | pima                 | pim                | pim                |
| kupuupa                | mpuupa                | apuupa                | puupa                | puup               | puup               |
| kupeket <sup>f</sup> a | mpeket <sup>f</sup> a | apeket <sup>f</sup> a | peket <sup>f</sup> a | peket <sup>f</sup> | peket <sup>f</sup> |
| kupiinda               | mpiinda               | apiinda               | piinda               | piind              | piind              |
| kuhiiga                | mpiiga                | ahiiga                | hiiga                | hiig               | hiig               |
| kuheeka                | mpeeka                | aheeka                | heeka                | heek               | heek               |
| kuhaangga              | mpaangga              | ahaangga              | haangga              | haang              | haang              |
| kuheeba                | mpeebe                | aheeba                | heeba                | heeb               | heeb               |
| kuhiima                | mpiima                | ahiima                | hiima                | hiim               | hiim               |
| kuhuuha                | mpuuha                | ahuuha                | huuha                | huuh               | huuh               |

*Rules:*

[ -voice ] → p / [ -vowel ]\_

English (in metatheory training set):

| stem+s | ŨR    | UR    |
|--------|-------|-------|
| kæps   | kæp   | kæp   |
| kæts   | kæt   | kæt   |
| kaks   | kak   | kak   |
| pruwfs | pruwf | pruwf |
| kæbz   | kæb   | kæb   |
| kædz   | kæd   | kæd   |
| kagz   | kag   | kag   |
| høvz   | høv   | høv   |
| flijz  | flij  | flij  |
| plæwz  | plæw  | plæw  |
| pjɪɹez | pjɪɹe | pjɪɹe |
| klæmz  | klæm  | klæm  |
| kænz   | kæn   | kæn   |
| karz   | kær   | kær   |
| gəlz   | gəl   | gəl   |
| slæps  | slæp  | slæp  |
| hʌts   | hʌt   | hʌt   |
| powks  | powk  | powk  |
| stæbz  | stæb  | stæb  |
| hajdz  | hajd  | hajd  |
| dʌgz   | dʌg   | dʌg   |
| læfs   | læf   | læf   |
| pʊθs   | pʊθ   | pʊθ   |
| slæmz  | slæm  | slæm  |
| kænz   | kæn   | kæn   |
| hæɪz   | hæɪ   | hæɪ   |
| θraɪvz | θraɪv | θraɪv |
| beɪðz  | beɪð  | beɪð  |
| flaɪz  | flaɪ  | flaɪ  |

Rules:

[ -vowel ] → [ +voice ] / [ +voice ]\_#

*Jita (in metatheory training set):*

| oku+<br>stem<br>+a | oku+<br>stem<br>+ira | oku+<br>stem<br>+ana | oku+<br>stem<br>+irana | okúmú+<br>stem<br>+a | okúmú+<br>stem<br>+ira | okut <sup>í</sup> +<br>stem<br>+a | okút <sup>í</sup> +<br>stem<br>+ira | ÛR  | UR  |
|--------------------|----------------------|----------------------|------------------------|----------------------|------------------------|-----------------------------------|-------------------------------------|-----|-----|
| okuβuma            | okuβumira            | okuβumana            | okuβumirana            | okumuβúma            | okumuβúmira            | okut <sup>í</sup> βúma            | okut <sup>í</sup> βúmira            | βum | βum |
| okusiβa            | okusiβira            | okusiβana            | okusiβirana            | okumusiβa            | okumusiβira            | okut <sup>í</sup> isiβa           | okut <sup>í</sup> isiβira           | siβ | siβ |
| okulúma            | okulumira            | okulumána            | okulumirana            | -                    | -                      | -                                 | -                                   | lúm | lúm |
| okukúβa            | okukuβira            | okukuβána            | okukuβirana            | -                    | -                      | -                                 | -                                   | kúβ | kúβ |

*Rules:*

$$[ +\text{vowel} ] \rightarrow [ +\text{highTone} ] / \left[ \begin{array}{c} +\text{highTone} \\ +\text{vowel} \end{array} \right] [ -\text{vowel} ]_0 \_ [ -\text{vowel} ]$$

$$[ +\text{vowel} ] \rightarrow [ -\text{highTone} ] / \_ [ -\text{vowel} ]_0 \left[ \begin{array}{c} +\text{highTone} \\ +\text{vowel} \end{array} \right]$$

This problem was manually graded:

- Move a high tone one syllable to the right. Rules 1 and 2 interact to effect this change and no other change.

No spurious rules.

*Koasati (in metatheory training set):*

| stem                    | am+stem                   | ŪR                      | UR                      |
|-------------------------|---------------------------|-------------------------|-------------------------|
| apaht <sup>f</sup> á    | amapaht <sup>f</sup> á    | apaht <sup>f</sup> á    | apaht <sup>f</sup> á    |
| asikt <sup>f</sup> í    | amasikt <sup>f</sup> í    | asikt <sup>f</sup> í    | asikt <sup>f</sup> í    |
| ilkanó                  | amilkanó                  | ilkanó                  | ilkanó                  |
| ifá                     | amifá                     | ifá                     | ifá                     |
| a:pó                    | ama:pó                    | a:pó                    | apó                     |
| iskí                    | amiskí                    | iskí                    | iskí                    |
| pat <sup>f</sup> okkóka | ampat <sup>f</sup> okkóka | pat <sup>f</sup> okkóka | pat <sup>f</sup> okkóka |
| towá                    | antowá                    | towá                    | towá                    |
| kastó                   | aŋkastó                   | kastó                   | kastó                   |
| bajá:na                 | ambajá:na                 | bajá:na                 | bajá:na                 |
| tá:ta                   | antá:ta                   | tá:ta                   | tá:ta                   |
| t <sup>f</sup> ofkoní   | añt <sup>f</sup> ofkoní   | t <sup>f</sup> ofkoní   | t <sup>f</sup> ofkoní   |
| kitiŋká                 | aŋkitiŋká                 | kitiŋká                 | kitiŋká                 |
| toní                    | antoní                    | toní                    | toní                    |

*Rules:*

$$[ +nasal ] \rightarrow \alpha place / - \left[ \begin{array}{l} \alpha place \\ -vowel \end{array} \right]$$

*Korean (in metatheory training set):*

| stem+ə  | stem+ninta  | ŪR     | UR     |
|---------|-------------|--------|--------|
| ana     | anninta     | an     | an     |
| kama    | kamninta    | kam    | kam    |
| sinə    | sinninta    | sin    | sin    |
| tʰatimə | tʰatimninta | tʰatim | tʰatim |
| nəmə    | nəmninta    | nəm    | nəm    |
| nama    | namninta    | nam    | nam    |
| tʰama   | tʰamninta   | tʰam   | tʰam   |
| ipə     | imninta     | ip     | ip     |
| kupə    | kumninta    | kup    | kup    |
| tʰəpə   | tʰəmninta   | tʰəp   | tʰəp   |
| tata    | tanninta    | tat    | tat    |
| putʰə   | punninta    | putʰ   | putʰ   |
| tʰotʰa  | tʰonninta   | tʰotʰ  | tʰotʰ  |
| məkə    | məɲninta    | mək    | mək    |
| səkʷə   | səɲninta    | səkʷ   | səkʷ   |
| takʷa   | taɲninta    | takʷ   | takʷ   |
| tʰukə   | tʰuɲninta   | tʰuk   | tʰuk   |
| ikə     | iɲninta     | ik     | ik     |

*Rules:*

[ +voice ] → [ +low ]<sub>i</sub> / [ +low ]<sub>i</sub> [ -vowel ]<sub>-#</sub>

[ -voice ] → [ +nasal ] / <sub>-</sub>[ -vowel ]

[ ] → a / tʰ<sub>-</sub>

Samoan (in metatheory training set):

| stem     | stem+ia   | ŪR       | UR       |
|----------|-----------|----------|----------|
| olo      | oloia     | olo      | olo      |
| lafo     | lafoia    | lafo     | lafo     |
| aŋa      | aŋaia     | aŋa      | aŋa      |
| usu      | usuia     | usu      | usu      |
| tau      | tauia     | tau      | tau      |
| taui     | tauia     | taui     | taui     |
| sa:ʔili  | sa:ʔilia  | sa:ʔili  | sa:ʔili  |
| vaŋai    | vaŋaia    | vaŋai    | vaŋai    |
| paʔi     | paʔia     | paʔi     | paʔi     |
| naumati  | naumatia  | naumati  | naumati  |
| sa:uni   | sa:unia   | sa:uni   | sa:uni   |
| seŋi     | seŋia     | seŋi     | seŋi     |
| lele     | lelea     | lele     | lele     |
| suʔe     | suʔea     | suʔe     | suʔe     |
| taʔe     | taʔea     | taʔe     | taʔe     |
| tafe     | tafea     | tafe     | tafe     |
| ta:upule | ta:upulea | ta:upule | ta:upule |
| palepale | palepalea | palepale | palepale |
| tu:      | tulia     | tu:l     | tu:l     |
| tau      | taulia    | taul     | taul     |
| ʔalo     | ʔalofia   | ʔalof    | ʔalof    |
| oso      | osofia    | osof     | osof     |
| sao      | saofia    | saof     | saof     |
| asu      | asuŋia    | asuŋ     | asuŋ     |
| pole     | poleŋia   | poleŋ    | poleŋ    |
| ifo      | ifoŋia    | ifoŋ     | ifoŋ     |
| ula      | ulaŋia    | ulaŋ     | ulaŋ     |
| milo     | milosia   | milos    | milos    |
| valu     | valusia   | valus    | valus    |
| vela     | velasia   | velas    | velas    |
| api      | apitia    | apit     | apit     |
| eʔe      | eʔetia    | eʔet     | eʔet     |
| lava:    | lavat:ia  | lavat:   | lavat:   |
| u:       | ut:ia     | u:t      | u:t      |
| puni     | punitia   | punit    | punit    |
| siʔo     | siʔomia   | siʔom    | siʔom    |
| ŋalo     | ŋalomia   | ŋalom    | ŋalom    |
| sopo     | sopoʔia   | sopoʔ    | sopoʔ    |
| au       | aulia     | aul      | aul      |
| ma:tau   | ma:taulia | ma:taul  | ma:taul  |
| ili      | ilifia    | ilif     | ilif     |
| ulu      | ulufia    | uluf     | uluf     |
| taŋo     | taŋofia   | taŋof    | taŋof    |
| soa      | soaŋia    | soaŋ     | soaŋ     |
| fesili   | fesiliŋia | fesiliŋ  | fesiliŋ  |
| ʔote     | ʔoteŋia   | ʔoteŋ    | ʔoteŋ    |
| tofu     | tofuŋia   | tofuŋ    | tofuŋ    |
| laʔa     | laʔasia   | laʔas    | laʔas    |
| taŋi     | taŋisia   | taŋis    | taŋis    |
| motu     | motusia   | motus    | motus    |
| mataʔu   | mataʔutia | mataʔut  | mataʔut  |
| sau      | sautia    | saut     | saut     |
| oʔo      | oʔotia    | oʔot     | oʔot     |
| ufi      | ufitia    | ufit     | ufit     |
| tanu     | tanumia   | tanum    | tanum    |
| moʔo     | moʔomia   | moʔom    | moʔom    |
| tao      | taomia    | taom     | taom     |
| fana     | fanaʔia   | fanaʔ    | fanaʔ    |



*Rules:*

$\left[ \begin{array}{l} \text{-back} \\ \text{+vowel} \end{array} \right] \rightarrow \emptyset / \left[ \begin{array}{l} \text{-back} \\ \text{+vowel} \end{array} \right]_-$

$\left[ \text{-vowel} \right] \rightarrow \emptyset / \_ \#$

Palauan :

| mó+stem  | stem+áll | stem+l | ŪR      | UR    |
|----------|----------|--------|---------|-------|
| məɔ́ɔ̀əb | dəŋəbáll | dəŋóbl | dáŋóɔ̀b | daŋob |
| mətéʔəb  | təʔəbáll | təʔíbl | téʔíɔ̀b | teʔib |
| məŋétəm  | ŋətəmáll | ŋətóml | ŋétóm   | ŋetom |
| mətábək  | təbəkáll | təbákl | tábák   | tabak |
| məʔárəm  | ʔərəmáll | ʔəróml | ʔáróm   | ʔarom |
| məsésəb  | səsəbáll | səsóbl | sésóɔ̀b | sesob |

Rules:

[ +voice ] → ə / [ ] [ -vowel ] \_ [ -vowel ] #

[ +vowel ] → ə / \_ [ -vowel ]<sub>0</sub> [ +stress ]  
[ +vowel ]

*Tunica* (in metatheory training set):

| stem | stem+ʔuhki | stem+ʔɔki | stem+hkʔaki | ŨR   | UR   |
|------|------------|-----------|-------------|------|------|
| pó   | póʔuhki    | póʔɔki    | póhkʔaki    | pó   | pó   |
| pí   | píʔuhki    | píʔɛki    | píhkʔaki    | pí   | pí   |
| já   | jáʔuhki    | jáʔaki    | jáhkʔaki    | já   | já   |
| tʃú  | tʃúʔuhki   | tʃúʔɔki   | tʃúhkʔaki   | tʃú  | tʃú  |
| hára | háraʔuhki  | háraʔaki  | hárahkʔaki  | hárá | hára |
| hípu | hípuʔuhki  | hípuʔɔki  | hípuhkʔaki  | hípu | hípu |
| náfi | náfiʔuhki  | náfiʔɛki  | náfihkʔaki  | náfí | náfí |

*Rules:*

[ +voice ] → ε / [ -back ] [ -vowel ]\_ [ -sonorant ]

[ +continuant ]  
[ -high ] → a / á [ -vowel ]\_

[ +voice ] → ∅ / [ ] [ -vowel ]\_ʔ

This problem was manually graded:

- vowel harmony: same backness and lowness as VC: [-high,-low] → [αlow,βbk] / [αlow,βbk]C\_ (ordered before V deletion). Model rules 1 and 2 implement this process but restrict the context in a way that's allowed because the data contains a pathologically tiny of front vowels, so the rule that it posits happens to work
- vowel deletion: V → ∅ / V[ʔ]\_CV. Model rule 3 applies only to Cʔ\_CV is fine. Application to [+voice] rather than V is allowed by such limited data, so that's OK

No spurious rules.

German (in metatheory training set):

| stem     | stem+ə    | stem+ən | stem+ər | ŨR       | UR       |
|----------|-----------|---------|---------|----------|----------|
| tak      | tagə      | –       | –       | tag      | tag      |
| volk     | volkə     | –       | –       | volk     | volk     |
| pəriskop | pəriskopə | –       | –       | pəriskop | pəriskop |
| hof      | höfə      | –       | –       | –        | hof      |
| wək      | wəgə      | –       | –       | wəg      | wəg      |
| ros      | rosə      | –       | –       | ros      | ros      |
| raup     | –         | raubən  | –       | raub     | raub     |
| ləit     | –         | ləidən  | –       | ləid     | ləid     |
| lop      | –         | lobən   | –       | lob      | lob      |
| lant     | –         | lændən  | –       | land     | land     |
| rat      | –         | ratən   | –       | rat      | rat      |
| grəis    | grəizes   | –       | –       | grəiz    | grəiz    |
| braf     | –         | –       | bravər  | brav     | brav     |

Rules:

$[-\text{sonorant}] \rightarrow [-\text{voice}] / \_ \#$

$[-\text{vowel}] \rightarrow [+voice] / - \left[ \begin{array}{l} -\text{sonorant} \\ +\text{voice} \end{array} \right]$

$[+\text{voice}] \rightarrow s / [ +\text{high} ] [ -\text{vowel} ] \_ \#$

$\emptyset \rightarrow e / \left[ \begin{array}{l} -\text{sonorant} \\ +\text{voice} \end{array} \right] - [ -\text{voice} ]$

Zoque (in metatheory training set):

| stem      | η+stem     | ŨR        | UR                  |
|-----------|------------|-----------|---------------------|
| pama      | mbama      | pama      | pama                |
| tatah     | ndatah     | tatah     | tatah               |
| kwarto    | ngwarto    | kwarto    | kwarto              |
| plato     | mblato     | plato     | plato               |
| trama     | ndrama     | trama     | trama               |
| disko     | ndisko     | disko     | disko               |
| gaju      | ngaju      | gaju      | gaju                |
| tʃoʔngoja | ɲdʒoʔngoja | tʃoʔngoja | tʃoʔnkoja/tʃoʔngoja |
| tsima     | ndzima     | tsima     | tsima               |
| sak       | sak        | sak       | sak                 |
| faha      | faha       | faha      | faha                |
| ʃapun     | ʃapun      | ʃapun     | ʃapun               |

Rules:

$$[ +nasal ] \rightarrow \emptyset / \# \_ \left[ \begin{array}{l} +continuant \\ -high \end{array} \right]$$

$$[ +nasal ] \rightarrow \alpha place / \# \_ \left[ \begin{array}{l} \alpha place \\ -vowel \end{array} \right]$$

$$[ -voice ] \rightarrow [ +voice ] / [ +nasal ] [ -vowel ] \_ \_$$

This problem was manually graded:

- nasal deletion: [+nas] → ∅ / \_[+cont]. Model gets this with rule 1
- nasal place assimilation: [+nas] → [α place] / \_[α place, -syll]. Model gets this with rule 2.
- postnasal voicing: [-son] → [+voi] / [+nas]\_. Model gets this with rule 3 (looks funny to allow voicing ts→dz, which should have been transcribed as a single segment)

No spurious rules.

Lumasaaba (in metatheory training set):

| ij+stem  | xa+stem | ŨR    | UR    |
|----------|---------|-------|-------|
| ijjele   | xaçele  | çele  | çele  |
| ingga:fu | xaxa:fu | xa:fu | xa:fu |
| imbeβa   | xaβeβa  | βeβa  | βeβa  |
| inggoxo  | xakoxo  | koxo  | koxo  |
| inggwe   | xakwe   | kwe   | kwe   |
| indali   | xatali  | tali  | tali  |
| imboko   | xaβoko  | βoko  | βoko  |

Rules:

$$[-\text{sonorant}] \rightarrow \begin{bmatrix} -\text{continuant} \\ +\text{voice} \end{bmatrix} / [-\text{vowel}]_-$$

$$[+\text{nasal}] \rightarrow \alpha\text{place} / -\begin{bmatrix} \alpha\text{place} \\ -\text{vowel} \end{bmatrix}$$

This problem was also manually graded:

- Post-nasal hardening:  $[-\text{son}] \rightarrow [-\text{cont}] / [+\text{nas}]_-$ . Model implements this process in first rule
- Post-nasal voicing:  $[-\text{son}] \rightarrow [+voice] / [+\text{nas}]_-$ . Model implements this process in first rule (according to manual grader: “nothing wrong with combining” the first and second processes into a single rule)
- Nasal place agreement:  $[+\text{nas}] \rightarrow [\alpha\text{ place}] / -[\alpha\text{ place}, -\text{syll}]$ . Model implements this process in second rule.

Model outputs no spurious rules.

Russian :

| stem+ú | stem+l  | stem+la  | stem+úí   | ŪR     | UR     |
|--------|---------|----------|-----------|--------|--------|
| vʲirnú | vʲirnúl | vʲirnúla | vʲirnúlʲi | vʲirnú | vʲirnú |
| vrú    | vrál    | vralá    | vrálʲi    | vra    | vrá    |
| stajú  | stajál  | stajála  | stajálʲi  | stajá  | stajá  |
| pʲikú  | pʲók    | pʲiklá   | pʲiklʲí   | pʲók   | pʲók   |
| vʲizú  | vʲós    | vʲizlá   | vʲizlʲí   | –      | vʲóz   |
| magú   | mók     | maglá    | maglʲí    | –      | móg    |
| móknu  | mók     | mókla    | móklʲi    | –      | mókn   |

Rules:

$$[ +\text{voice} ] \rightarrow \left[ \begin{array}{l} +\text{stress} \\ +\text{vowel} \end{array} \right] / [ -\text{stress} ] [ -\text{vowel} ]_-[ -\text{vowel} ]_0 \left\{ \begin{array}{l} -\text{back} \\ +\text{vowel} \end{array} \right\}, \# \}$$

$$[ +\text{vowel} ] \rightarrow i / \left\{ \begin{array}{l} +\text{stress} \\ +\text{vowel} \end{array} \right\}, \# \} [ -\text{vowel} ]_-[ -\text{vowel} ]_0 \left[ \begin{array}{l} +\text{stress} \\ +\text{vowel} \end{array} \right]$$

$$[ \quad ] \rightarrow \emptyset / \left[ \begin{array}{l} +\text{continuant} \\ -\text{high} \end{array} \right] \left[ \begin{array}{l} -\text{lateral} \\ -\text{low} \end{array} \right]_-[ +\text{vowel} ], \# \}$$

Japanese :

| stem+ru            | stem+anai             | stem+itai             | stem+tda            | stem+joo            | ŨR               | UR                |
|--------------------|-----------------------|-----------------------|---------------------|---------------------|------------------|-------------------|
| neru               | nenai                 | netai                 | neta                | nejoo               | ne               | ne                |
| miru               | minai                 | mitai                 | mita                | mijoo               | mi               | mi                |
| finu               | fīnainai              | fīnitai               | fīnda               | fīnoo               | fīn              | fīn               |
| jōmu               | jōmanai               | jōmitai               | jōnda               | jōmoo               | jōm              | jōm               |
| jobu               | jobanai               | jobitai               | jōnda               | joboo               | job              | job               |
| kat <sup>s</sup> u | katanai               | kat <sup>f</sup> itai | katta               | katoo               | kat <sup>f</sup> | kat <sup>s</sup>  |
| kasu               | kasanaï               | ka <sup>f</sup> itai  | ka <sup>f</sup> ita | kasoo               | –                | kas               |
| waku               | wakanai               | wakitai               | waita               | wakoo               | –                | wak               |
| t <sup>s</sup> ugu | t <sup>s</sup> uganai | t <sup>s</sup> ugitai | t <sup>s</sup> uida | t <sup>s</sup> ugoo | –                | t <sup>s</sup> ug |
| karu               | karanai               | karitai               | katta               | karoo               | –                | kar               |
| kau                | kawanai               | kaitai                | katta               | kaoo                | –                | kaw               |

Rules:

$\left[ \begin{array}{l} \text{-anterior} \\ \text{-low} \end{array} \right] \rightarrow t^s / \left[ \begin{array}{l} \text{+vowel} \\ \text{ } \end{array} \right] \_ \left[ \begin{array}{l} \text{-vowel} \\ \text{ } \end{array} \right]$

$\left[ \begin{array}{l} \text{+voice} \\ \text{ } \end{array} \right] \rightarrow n / \left[ \begin{array}{l} \text{+vowel} \\ \text{ } \end{array} \right] \_ \left[ \begin{array}{l} \text{-continuant} \\ \text{ } \end{array} \right]$

$\left[ \begin{array}{l} \text{-vowel} \\ \text{ } \end{array} \right] \rightarrow \emptyset / \left[ \begin{array}{l} \text{+vowel} \\ \text{ } \end{array} \right] \left[ \begin{array}{l} \text{-vowel} \\ \text{ } \end{array} \right] \_$

$\left[ \begin{array}{l} \text{-sonorant} \\ \text{ } \end{array} \right] \rightarrow t / \left[ \begin{array}{l} \text{-rounded} \\ \text{-nasal} \end{array} \right] \_ \left[ \begin{array}{l} \text{-high} \\ \text{ } \end{array} \right]$



Swahili :

| u+stem               | stem                             | ma+stem              | ŨR                               | UR                               |
|----------------------|----------------------------------|----------------------|----------------------------------|----------------------------------|
| ubale                | mbale                            | –                    | bale                             | bale                             |
| udago                | ndago                            | –                    | dago                             | dago                             |
| ugimbi               | ngimbi                           | –                    | gimbi                            | gimbi                            |
| ud <sup>ɕ</sup> ia   | nd <sup>ɕ</sup> ia               | –                    | d <sup>ɕ</sup> ia                | d <sup>ɕ</sup> ia                |
| upad <sup>ɕ</sup> a  | p <sup>h</sup> ad <sup>ɕ</sup> a | mapad <sup>ɕ</sup> a | p <sup>h</sup> ad <sup>ɕ</sup> a | p <sup>h</sup> ad <sup>ɕ</sup> a |
| upamba               | p <sup>h</sup> amba              | –                    | p <sup>h</sup> amba              | p <sup>h</sup> amba              |
| utunzo               | t <sup>h</sup> unzo              | matunzo              | t <sup>h</sup> unzo              | t <sup>h</sup> unzo              |
| utunda               | t <sup>h</sup> unda              | –                    | t <sup>h</sup> unda              | t <sup>h</sup> unda              |
| ukelele              | k <sup>h</sup> elele             | makelele             | k <sup>h</sup> elele             | k <sup>h</sup> elele             |
| ukumbi               | k <sup>h</sup> umbi              | –                    | k <sup>h</sup> umbi              | k <sup>h</sup> umbi              |
| ut <sup>ʃ</sup> oma  | t <sup>h</sup> oma               | mat <sup>ʃ</sup> oma | t <sup>h</sup> oma               | t <sup>h</sup> oma               |
| ut <sup>ʃ</sup> ajgo | t <sup>h</sup> ajgo              | –                    | t <sup>h</sup> ajgo              | t <sup>h</sup> ajgo              |
| ufuasi               | fuasi                            | mafuasi              | fuasi                            | fuasi                            |
| ufuko                | fuko                             | –                    | fk <sup>h</sup> o                | fuko                             |
| uvufo                | vufo                             | mavufo               | vfo                              | vufo                             |
| uvumbi               | vumbi                            | –                    | vɣbi                             | vumbi                            |
| usiku                | siku                             | masiku               | siku                             | siku                             |
| usira                | sira                             | –                    | sira                             | sira                             |
| ufono                | fono                             | mafono               | fono                             | fono                             |
| ufajga               | fajga                            | –                    | fajga                            | fajga                            |
| uwingu               | mbingu                           | –                    | bwingu                           | bingu                            |
| uwili                | mbili                            | –                    | bwili                            | wili                             |
| ulimi                | ndimi                            | –                    | dlimi                            | limi                             |
| urefu                | ndefu                            | –                    | drefu                            | refu                             |
| umio                 | mio                              | –                    | mmio                             | mio                              |
| wimbo                | jimbo                            | –                    | ɲijbo                            | imbo                             |
| wembe                | jembe                            | –                    | ɲembe                            | embe                             |
| wakati               | ɲakati                           | –                    | –                                | akati                            |
| ufi                  | ɲufi                             | –                    | –                                | ufi                              |
| foka                 | –                                | mafoka               | –                                | foka                             |
| tunda                | –                                | matunda              | –                                | tunda                            |
| kafa                 | –                                | makafa               | –                                | kafa                             |

Rules:

$$\left[ \begin{array}{l} \text{-back} \\ \text{-sibilant} \\ \text{-tense} \end{array} \right] \rightarrow \emptyset / \# \left[ \quad \right] \_ \left[ \begin{array}{l} \text{-back} \\ \text{+sonorant} \end{array} \right]$$

$$\emptyset \rightarrow \text{m} / \# \_ \left[ \begin{array}{l} \text{-sonorant} \\ \text{+voice} \end{array} \right] \left[ \text{+vowel} \right]$$

$$\left[ \text{+nasal} \right] \rightarrow \alpha \text{place} / \_ \left[ \begin{array}{l} \alpha \text{place} \\ \text{-vowel} \end{array} \right]$$

$$\emptyset \rightarrow \text{u} / \left[ \text{-sonorant} \right] \_ \left[ \text{-vowel} \right]$$

$$\left[ \text{-vowel} \right] \rightarrow \left[ \text{-aspirated} \right] / \left[ \quad \right] \_$$

$$\left[ \text{+vowel} \right] \rightarrow \text{w} / \# \_ \left[ \text{+vowel} \right]$$

Russian (in metatheory training set):

| stem+á                             | stem                              | stem+é                                           | stem+i                             | ŪR                | UR                      |
|------------------------------------|-----------------------------------|--------------------------------------------------|------------------------------------|-------------------|-------------------------|
| luná                               | lún                               | lun <sup>j</sup> é                               | lúni                               | lún               | lun                     |
| dirá                               | dír                               | dir <sup>j</sup> é                               | díri                               | dír               | dir                     |
| travá                              | tráf                              | trav <sup>j</sup> é                              | trávi                              | tráv              | trav                    |
| p <sup>j</sup> ilá                 | p <sup>j</sup> íl                 | p <sup>j</sup> il <sup>j</sup> é                 | p <sup>j</sup> íli                 | p <sup>j</sup> íl | p <sup>j</sup> íl/pil   |
| valná                              | vóln                              | valn <sup>j</sup> é                              | vólni                              | –                 | voln                    |
| galavá                             | galóf                             | galav <sup>j</sup> é                             | gólavi                             | –                 | gólov                   |
| ʒil <sup>j</sup> izá               | ʒil <sup>j</sup> ós               | ʒil <sup>j</sup> iz <sup>j</sup> é               | ʒél <sup>j</sup> izi               | –                 | ʒél <sup>j</sup> oz     |
| ʒiná                               | ʒón                               | ʒin <sup>j</sup> é                               | ʒóni                               | –                 | ʒon                     |
| zm <sup>j</sup> ijá                | zm <sup>j</sup> éj                | zm <sup>j</sup> ijé                              | zm <sup>j</sup> éji                | –                 | zm <sup>j</sup> éj      |
| m <sup>j</sup> éna                 | m <sup>j</sup> én                 | m <sup>j</sup> én <sup>j</sup> i                 | m <sup>j</sup> éni                 | –                 | m <sup>j</sup> én       |
| p <sup>j</sup> il <sup>j</sup> iná | p <sup>j</sup> il <sup>j</sup> ón | p <sup>j</sup> il <sup>j</sup> in <sup>j</sup> é | p <sup>j</sup> il <sup>j</sup> iní | –                 | p <sup>j</sup> ilón     |
| b <sup>j</sup> is <sup>j</sup> éda | b <sup>j</sup> is <sup>j</sup> ét | b <sup>j</sup> is <sup>j</sup> éd <sup>j</sup> i | b <sup>j</sup> is <sup>j</sup> édi | –                 | b <sup>j</sup> iséd     |
| b <sup>j</sup> idá                 | b <sup>j</sup> ét                 | b <sup>j</sup> id <sup>j</sup> é                 | b <sup>j</sup> édi                 | –                 | b <sup>j</sup> ed       |
| p <sup>j</sup> itá                 | p <sup>j</sup> át                 | p <sup>j</sup> it <sup>j</sup> é                 | p <sup>j</sup> ití                 | –                 | p <sup>j</sup> at       |
| st <sup>j</sup> iná                | st <sup>j</sup> én                | st <sup>j</sup> in <sup>j</sup> é                | st <sup>j</sup> éni                | –                 | stén/st <sup>j</sup> én |
| r <sup>j</sup> iká                 | r <sup>j</sup> ék                 | r <sup>j</sup> ik <sup>j</sup> é                 | r <sup>j</sup> ék <sup>j</sup> i   | –                 | r <sup>j</sup> ek/rék   |
| slugá                              | slúk                              | slug <sup>j</sup> é                              | slúg <sup>j</sup> i                | –                 | slug                    |
| blaxá                              | blóx                              | blax <sup>j</sup> é                              | blóx <sup>j</sup> i                | –                 | blox                    |

Rules:

[ -sonorant ] → [ -voice ] / \_#

[ -vowel ] → [ +palatalized ] / - [  $\begin{matrix} \text{-back} \\ \text{+vowel} \end{matrix}$  ]

[ +vowel ] → [ -stress ] / - [ -vowel ]<sub>0</sub> [  $\begin{matrix} \text{+stress} \\ \text{+vowel} \end{matrix}$  ]

This problem was manually graded. The textbook problem statement specifies that the rules governing stress are not to be found by the student; the system makes little headway because it gets stuck trying to explain the stress patterns.

- There are some rules for stress, but they're complicated and not easy (or possible?) to state in this formalism. This can't be solved with this data, in this model. A couple pieces that come close: suffix stress: delete in the context of a stem stress. stress: initial if no other stress (but there are exceptions, because it isn't really right).
- palatalization:  $C \rightarrow C^j / \_[-\text{back}]$ . Model implements this with rule 2.
- final devoicing:  $[-\text{son}] \rightarrow [-\text{voi}] / \_#$ . Model implements this with rule 1.
- vowel reduction: stressless  $V \rightarrow i / \_3$ . Model misses this process.
- vowel reduction: stressless  $o \rightarrow a$ . Model misses this process.
- vowel reduction: stressless  $\varepsilon \rightarrow i$ . Model misses this process.

Third rule (which moves stresses) is spurious, and occurs because the model is trying to explain stress patterns when the problem states that stress patterns do not need to be explained.

Finnish :

| stem+n   | stem    | stem+t   | stem+lta   | stem+kna  | ŪR      | UR      |
|----------|---------|----------|------------|-----------|---------|---------|
| kanadan  | kanada  | kanadat  | kanadalta  | kanadana  | kanada  | kanada  |
| kirjan   | kirja   | kirjat   | kirjalta   | kirjana   | kirja   | kirja   |
| aamun    | aamu    | aamut    | aamulta    | aamuna    | aamu    | aamu    |
| talon    | talo    | talot    | talolta    | talona    | talo    | talo    |
| koiran   | koira   | koirat   | koiralta   | koirana   | koira   | koira   |
| hüivæn   | hüivæ   | hüivæt   | hüivæltæ   | hüivænæ   | hüivæ   | hüivæ   |
| kuvan    | kuva    | kuvat    | kuvalta    | kuvana    | kuva    | kuva    |
| lain     | laki    | lait     | lailta     | lakina    | laki    | laki    |
| nælæn    | nælkæ   | nælet    | næleltæ    | nælkænæ   | nælkæ   | nælkæ   |
| jalan    | jalka   | jalat    | jalalta    | jalkana   | jalka   | jalka   |
| leuan    | leuka   | leuat    | leualta    | leukana   | leuka   | leuka   |
| paran    | parka   | parat    | paralta    | parkana   | parka   | parka   |
| reian    | reikæ   | reiet    | reieältæ   | reikænæ   | reikæ   | reikæ   |
| nahan    | nahka   | nahat    | nahalta    | nahkana   | nahka   | nahka   |
| vihon    | vihko   | vihot    | viholta    | vihkona   | vihko   | vihko   |
| laihan   | laiha   | laihat   | laihulta   | laihana   | laiha   | laiha   |
| avun     | apu     | avut     | avulta     | apuna     | apu     | apu     |
| halvan   | halpa   | halvat   | halvalta   | halpana   | halpa   | halpa   |
| orvon    | orpo    | orvot    | orvolta    | orpona    | orpo    | orpo    |
| leivæn   | leipæ   | leivæt   | leivæltæ   | leipænæ   | leipæ   | leipæ   |
| pæivæn   | pæivæ   | pæivæt   | pæivæltæ   | pæivænæ   | pæiva   | pæiva   |
| kilvan   | kilpa   | kilvat   | kilvalta   | kilpana   | kilpa   | kilpa   |
| külvün   | külpü   | külvüt   | külvültæ   | külpünæ   | külpü   | külpü   |
| tavan    | tapa    | tavat    | tavalta    | tapana    | tapa    | tapa    |
| korvan   | korva   | korvat   | korvalta   | korvana   | korva   | korva   |
| æidin    | æiti    | æidit    | æidiltæ    | æitinä    | æiti    | æiti    |
| kodin    | koti    | kodit    | kodilta    | kotina    | koti    | koti    |
| muodon   | muoto   | muodot   | muodolta   | muotona   | muoto   | muoto   |
| tædin    | tæti    | tædit    | tædiltæ    | tætinä    | tæti    | tæti    |
| kadun    | katu    | kadut    | kadulta    | katuna    | katu    | katu    |
| maidon   | maito   | maidot   | maidolta   | maitona   | maito   | maito   |
| pöüdæn   | pöütæ   | pöüdet   | pöüdæltæ   | pöütænæ   | pöüta   | pöütæ   |
| tehdün   | tehtü   | tehdüt   | tehdültæ   | tehtünæ   | tehtü   | tehtü   |
| læmmön   | læmpö   | læmmöt   | læmmöltæ   | læmpönæ   | læmpö   | læmpö   |
| lajjan   | lajka   | lajjat   | lajjalta   | lajkana   | lajka   | lajka   |
| sæjgün   | sæjki   | sæjgit   | sæjgiltæ   | sæjkinæ   | sæjki   | sæjki   |
| hinnan   | hintu   | hinnat   | hinnalta   | hintana   | hintu   | hintu   |
| linnun   | lintu   | linnut   | linnulta   | lintuna   | lintu   | lintu   |
| opinnon  | opinto  | opinnot  | opinnoilta | opintona  | –       | opinto  |
| rannan   | ranta   | rannat   | rannalta   | rantana   | ranta   | ranta   |
| luonnon  | luonto  | luonnot  | luonnoilta | luontona  | luonto  | luonto  |
| punnan   | punta   | punnat   | punnalta   | puntana   | punta   | punta   |
| tunnin   | tunti   | tunnit   | tunnilta   | tuntina   | tunti   | tunti   |
| kunnon   | kunto   | kunnot   | kunnoilta  | kuntona   | kunto   | kunto   |
| kannun   | kannu   | kannut   | kannulta   | kannuna   | –       | kannu   |
| linnan   | linna   | linnat   | linnalta   | linnana   | –       | linna   |
| tumman   | tumma   | tummat   | tummalta   | tummana   | –       | tumma   |
| aurigjon | aurigko | aurigjot | aurigjolta | aurigkona | aurigko | aurigko |
| rejjin   | rejki   | rejjit   | rejjiltæ   | rejkinæ   | –       | rejki   |
| vajjin   | vajki   | vajjit   | vajjilta   | vajkina   | vajki   | vajki   |
| kello    | kello   | kellot   | kelloilta  | kellona   | kello   | kello   |
| kellan   | kelta   | kellat   | kellalta   | keltana   | –       | kelta   |
| sillan   | silta   | sillat   | sillalta   | siltana   | –       | silta   |
| kullan   | kulta   | kullat   | kullalta   | kultana   | –       | kulta   |
| virran   | virta   | virrat   | virralta   | virtana   | –       | virta   |
| parran   | parta   | parrat   | parralta   | partana   | –       | parta   |

*Rules:*

[ +vowel ] → [ -back ] / ü [ -vowel ]<sub>0</sub> \_

p → v / [ ] \_ [ ] [ +coronal ]

t → [ +voice ] / [ ] \_ [ ] [ +coronal ]

[ +vowel ] → [ -back ] / æ [ ]<sub>0</sub> \_

[ -vowel ] → [ +nasal ] / [ +nasal ] \_ [ ] [ -back ]

k → ∅ / [ ] \_ [ ] [ -high ]

*Korean :*

(note: the data is shown transposed because otherwise it does not fit on the PDF page)

|                      |                         |                         |                         |                         |                         |                         |                         |                         |  |
|----------------------|-------------------------|-------------------------|-------------------------|-------------------------|-------------------------|-------------------------|-------------------------|-------------------------|--|
| stem+                |                         |                         |                         |                         |                         |                         |                         |                         |  |
| man                  | pamman                  | summan                  | pamman                  | pamman                  | namman                  | namman                  | namman                  | pamman                  |  |
| stem+                |                         |                         |                         |                         |                         |                         |                         |                         |  |
| majk <sup>h</sup> im | pammajk <sup>h</sup> im | summajk <sup>h</sup> im | pammajk <sup>h</sup> im | pammajk <sup>h</sup> im | nammajk <sup>h</sup> im | nammajk <sup>h</sup> im | nammajk <sup>h</sup> im | pammajk <sup>h</sup> im |  |
| stem+                |                         |                         |                         |                         |                         |                         |                         |                         |  |
| narim                | pamnarim                | sumnarim                | pamnarim                | pannarim                | nannarim                | nannarim                | nannarim                | pannarim                |  |
| stem+                |                         |                         |                         |                         |                         |                         |                         |                         |  |
| pap                  | pap                     | sup                     | pam                     | pat                     | nat                     | nat                     | nat                     | pan                     |  |
| stem+                |                         |                         |                         |                         |                         |                         |                         |                         |  |
| tero                 | paptero                 | suptero                 | pamtero                 | pattero                 | nattero                 | nattero                 | nattero                 | pantero                 |  |
| stem+                |                         |                         |                         |                         |                         |                         |                         |                         |  |
| kwa                  | papkwa                  | supkwa                  | pamkwa                  | pakkwa                  | nakkwa                  | nakkwa                  | nakkwa                  | paykwa                  |  |
| stem+                |                         |                         |                         |                         |                         |                         |                         |                         |  |
| pota                 | pappota                 | suppota                 | pampota                 | pappota                 | nappota                 | nappota                 | nappota                 | pampota                 |  |
| stem+                |                         |                         |                         |                         |                         |                         |                         |                         |  |
| kat <sup>f</sup> i   | papkat <sup>f</sup> i   | supkat <sup>f</sup> i   | pamkat <sup>f</sup> i   | pakkat <sup>f</sup> i   | nakkat <sup>f</sup> i   | nakkat <sup>f</sup> i   | nakkat <sup>f</sup> i   | paykat <sup>f</sup> i   |  |
| stem+                |                         |                         |                         |                         |                         |                         |                         |                         |  |
| i                    | papi                    | sup <sup>h</sup> i      | pami                    | pat <sup>h</sup> i      | nasi                    | nat <sup>f</sup> i      | nat <sup>h</sup> i      | pani                    |  |
| stem+                |                         |                         |                         |                         |                         |                         |                         |                         |  |
| in                   | papin                   | sup <sup>h</sup> in     | pamin                   | pat <sup>h</sup> in     | nasin                   | nat <sup>f</sup> in     | nat <sup>h</sup> in     | panin                   |  |
| stem+                |                         |                         |                         |                         |                         |                         |                         |                         |  |
| e                    | pape                    | sup <sup>h</sup> e      | pame                    | pat <sup>h</sup> e      | nase                    | nat <sup>f</sup> e      | nat <sup>h</sup> e      | pane                    |  |
| stem+                |                         |                         |                         |                         |                         |                         |                         |                         |  |
| ita                  | papita                  | sup <sup>h</sup> ita    | pamita                  | pat <sup>h</sup> ita    | nasita                  | nat <sup>f</sup> ita    | nat <sup>h</sup> ita    | panita                  |  |
| stem+                |                         |                         |                         |                         |                         |                         |                         |                         |  |
| iro                  | papiro                  | sup <sup>h</sup> iro    | pamiro                  | pat <sup>h</sup> iro    | nasiro                  | nat <sup>f</sup> iro    | nat <sup>h</sup> iro    | paniro                  |  |
| ŨR                   | pap                     | sup                     | pam                     | –                       | –                       | –                       | –                       | –                       |  |
| UR                   | pap                     | sup <sup>h</sup>        | pam                     | pat <sup>h</sup>        | nas                     | nat <sup>f</sup>        | nat <sup>h</sup>        | pan                     |  |

*Rules:*

[ -voice ] → [ +nasal ] / \_[ +nasal ]

[ -vowel ] → p<sup>h</sup> / u\_ [ +vowel ]

Sakha (Yakut) :

| stem    | stem+lar   | stem+liin   | ŪR      | UR      |
|---------|------------|-------------|---------|---------|
| aya     | aýalar     | ayaliin     | aya     | aya     |
| paarta  | paartalar  | paartaliin  | paarta  | paarta  |
| tia     | tialar     | tialiin     | tia     | tia     |
| kinige  | kinigeler  | kinigeliin  | kinige  | kinige  |
| fie     | fjeler     | fjeliin     | fie     | fie     |
| ije     | ijeler     | ijeliin     | ije     | ije     |
| kini    | kiniler    | kiniliin    | kini    | kini    |
| bie     | bieler     | bieliin     | bie     | bie     |
| oyo     | oyolor     | oyoluun     | oyo     | oyo     |
| çopto   | çoptolor   | çoptoluun   | çopto   | çopto   |
| börö    | börölör    | böröliin    | börö    | börö    |
| tial    | tiallar    | tialiin     | tial    | tial    |
| ial     | iallar     | ialiin      | ial     | ial     |
| kuul    | kuullar    | kuulluun    | kuul    | kuul    |
| at      | attar      | attiin      | at      | at      |
| balik   | baliktar   | baliktiin   | balik   | balik   |
| iskaap  | iskaaptar  | iskaaptiin  | iskaap  | iskaap  |
| oyus    | oyustar    | oyustuun    | oyis    | oyis    |
| kus     | kustar     | kustuun     | kus     | kus     |
| tümmük  | tümmükter  | tümmüktüün  | tümmik  | tümmik  |
| sep     | septer     | septiin     | sep     | sep     |
| et      | etter      | ettiin      | et      | et      |
| örüs    | örüster    | örüstüün    | örus    | örus    |
| tiis    | tiister    | tiistiin    | tiis    | tiis    |
| soroç   | soroçtor   | soroçtuun   | soroç   | soroç   |
| oç      | oçtor      | oçtuun      | oç      | oç      |
| oloppos | oloppostor | oloppostuun | olappos | olappos |
| ötöç    | ötöçtör    | ötöçtüün    | ötöç    | ötöç    |
| ubaj    | ubajdar    | ubajdiin    | ubaj    | ubaj    |
| saraj   | sarajdar   | sarajdiin   | saraj   | saraj   |
| tij     | tijdar     | tijdiin     | tij     | tij     |
| atiir   | atiirdar   | atiirdiin   | atiir   | atiir   |
| ojuur   | ojuurdar   | ojuurduun   | ojuur   | ojuur   |
| üt'ügej | üt'ügejder | üt'ügejdiin | üt'ugaj | üt'ugaj |
| efiij   | efiijder   | efiijdiin   | efiij   | efiij   |
| tomtor  | tomtordor  | tomtorduun  | tomtor  | tomtor  |
| moyotoj | moyotojdor | moyotojduun | moyotoj | moyotoj |
| kötör   | kötördör   | kötördüün   | köter   | köter   |
| bölköj  | bölköjdör  | bölköjdüün  | bölköj  | bölköj  |
| çatiŋ   | çatiŋnar   | çatiŋniin   | çatiŋ   | çatiŋ   |
| aan     | aannar     | aanniin     | aan     | aan     |
| tiij    | tiijner    | tiijniin    | tiij    | tiij    |
| sordoŋ  | sordoŋnor  | sordoŋnuun  | sordoŋ  | sordoŋ  |
| olom    | olomnor    | olomnuun    | olom    | olom    |
| oron    | oronnor    | oronnuun    | oron    | oron    |
| bödöj   | bödöjnor   | bödöjnüün   | bödeŋ   | bödeŋ   |

*Rules:*

$l \rightarrow d / \left[ \begin{array}{l} \text{-lateral} \\ \text{-tense} \end{array} \right] \_$

$[-\text{vowel}] \rightarrow [-\text{voice}] / [-\text{voice}] \_$

$[+\text{vowel}] \rightarrow [+rounded] / [+rounded] [-\text{low}] \_$

$\left[ \begin{array}{l} +\text{continuant} \\ -\text{high} \end{array} \right] \rightarrow [-\text{rounded}] / \text{u} [-\text{vowel}] \_$

$[+\text{vowel}] \rightarrow \left[ \begin{array}{l} -\text{back} \\ -\text{low} \end{array} \right] / \left[ \begin{array}{l} -\text{back} \\ +\text{vowel} \end{array} \right] [ \quad ] \_$

$\left[ \begin{array}{l} -\text{sonorant} \\ +\text{voice} \end{array} \right] \rightarrow [+nasal] / [+nasal] \_$

Sadzava Ukrainian :

| stem                                            | stem+a                            | stem+i                                          | stem                                            | stem                                            | stem                              | stem                                                         | stem                  | stem | ŪR                               | UR                                |
|-------------------------------------------------|-----------------------------------|-------------------------------------------------|-------------------------------------------------|-------------------------------------------------|-----------------------------------|--------------------------------------------------------------|-----------------------|------|----------------------------------|-----------------------------------|
| plast                                           | plasta                            | plas <sup>l</sup> k <sup>i</sup>                | –                                               | –                                               | –                                 | –                                                            | –                     | –    | plast                            | plast                             |
| skorux                                          | skoruxa                           | skorus <sup>l</sup> i                           | –                                               | –                                               | –                                 | –                                                            | –                     | –    | skorux                           | skorux                            |
| ɣ <sup>l</sup> r <sup>l</sup> ix                | ɣ <sup>l</sup> r <sup>l</sup> ixa | ɣ <sup>l</sup> r <sup>l</sup> is <sup>l</sup> i | –                                               | –                                               | –                                 | –                                                            | –                     | –    | ɣ <sup>l</sup> r <sup>l</sup> ix | ɣrix                              |
| pastux                                          | pastuxa                           | pastus <sup>l</sup> i                           | –                                               | –                                               | –                                 | –                                                            | –                     | –    | pastux                           | pastux                            |
| m <sup>l</sup> n <sup>l</sup> ux                | m <sup>l</sup> n <sup>l</sup> uxa | m <sup>l</sup> n <sup>l</sup> us <sup>l</sup> i | –                                               | –                                               | –                                 | –                                                            | –                     | –    | m <sup>l</sup> n <sup>l</sup> ux | m <sup>l</sup> n <sup>l</sup> ux  |
| pluy                                            | pluya                             | pluz <sup>l</sup> i                             | –                                               | –                                               | –                                 | –                                                            | –                     | –    | –                                | pluy                              |
| s <sup>l</sup> t <sup>l</sup> iy                | stoya                             | stoz <sup>l</sup> i                             | –                                               | –                                               | –                                 | –                                                            | –                     | –    | –                                | stoy                              |
| sak                                             | saka                              | sats <sup>l</sup> i                             | –                                               | –                                               | –                                 | –                                                            | –                     | –    | –                                | sak                               |
| bek                                             | boka                              | bots <sup>l</sup> i                             | –                                               | –                                               | –                                 | –                                                            | –                     | –    | –                                | bek                               |
| lest                                            | losta                             | lōs <sup>l</sup> k <sup>l</sup> i               | –                                               | –                                               | –                                 | –                                                            | –                     | –    | –                                | lest                              |
| lest                                            | lesta                             | les <sup>l</sup> k <sup>l</sup> i               | –                                               | –                                               | –                                 | –                                                            | –                     | –    | lest                             | lest                              |
| p <sup>l</sup> it                               | plota                             | plok <sup>l</sup> i                             | –                                               | –                                               | –                                 | –                                                            | –                     | –    | –                                | plot                              |
| s <sup>l</sup> m <sup>l</sup> r <sup>l</sup> id | smroda                            | smrog <sup>l</sup> i                            | –                                               | –                                               | –                                 | –                                                            | –                     | –    | –                                | smrod                             |
| fist                                            | fosta                             | fos <sup>l</sup> k <sup>l</sup> i               | –                                               | –                                               | –                                 | –                                                            | –                     | –    | –                                | fost                              |
| m <sup>l</sup> ist                              | mosta                             | mos <sup>l</sup> k <sup>l</sup> i               | –                                               | –                                               | –                                 | –                                                            | –                     | –    | –                                | most                              |
| lid                                             | lædu                              | lōdu                                            | –                                               | –                                               | –                                 | –                                                            | –                     | –    | –                                | lod                               |
| d <sup>l</sup> it                               | drota                             | drok <sup>l</sup> i                             | –                                               | –                                               | –                                 | –                                                            | –                     | –    | –                                | drot                              |
| m <sup>l</sup> id                               | mædu                              | mōdu                                            | –                                               | –                                               | –                                 | –                                                            | –                     | –    | –                                | mæd                               |
| v <sup>l</sup> il                               | vola                              | vol <sup>l</sup> i                              | –                                               | –                                               | –                                 | –                                                            | –                     | –    | –                                | vol                               |
| v <sup>l</sup> iz                               | voza                              | voz <sup>l</sup> i                              | –                                               | –                                               | –                                 | –                                                            | –                     | –    | –                                | voz                               |
| ser                                             | sera                              | ser <sup>l</sup> i                              | –                                               | –                                               | –                                 | –                                                            | –                     | –    | –                                | ser                               |
| s <sup>l</sup> n <sup>l</sup> ip                | snopa                             | snop <sup>l</sup> i                             | –                                               | –                                               | –                                 | –                                                            | –                     | –    | –                                | snop                              |
| ɣreb                                            | ɣraba                             | ɣrāb <sup>l</sup> i                             | –                                               | –                                               | –                                 | –                                                            | –                     | –    | –                                | ɣreb                              |
| læb <sup>l</sup> id                             | læbada                            | læbāg <sup>l</sup> i                            | –                                               | –                                               | –                                 | –                                                            | –                     | –    | –                                | læbæd                             |
| bær <sup>l</sup> iy                             | bærōya                            | bærōz <sup>l</sup> i                            | –                                               | –                                               | –                                 | –                                                            | –                     | –    | –                                | bæræy                             |
| pær <sup>l</sup> iy                             | pærōya                            | pærōz <sup>l</sup> i                            | –                                               | –                                               | –                                 | –                                                            | –                     | –    | –                                | pærōy                             |
| por <sup>l</sup> iy                             | porōya                            | porōz <sup>l</sup> i                            | –                                               | –                                               | –                                 | –                                                            | –                     | –    | –                                | porōy                             |
| bol <sup>l</sup> ek                             | bol <sup>l</sup> ōka              | bol <sup>l</sup> ōts <sup>l</sup> i             | –                                               | –                                               | –                                 | –                                                            | –                     | –    | –                                | bol <sup>l</sup> ek               |
| vor <sup>l</sup> iy                             | vorōya                            | vorōz <sup>l</sup> i                            | –                                               | –                                               | –                                 | –                                                            | –                     | –    | –                                | vorōy                             |
| konək                                           | konōka                            | konōts <sup>l</sup> i                           | –                                               | –                                               | –                                 | –                                                            | –                     | –    | –                                | konək                             |
| pot <sup>l</sup> ik                             | potōka                            | potōts <sup>l</sup> i                           | –                                               | –                                               | –                                 | –                                                            | –                     | –    | –                                | potok                             |
| t <sup>l</sup> ik                               | tōka                              | tōts <sup>l</sup> i                             | –                                               | –                                               | –                                 | –                                                            | –                     | –    | –                                | tok                               |
| k <sup>l</sup> il                               | kōla                              | kol <sup>l</sup> i                              | –                                               | –                                               | –                                 | –                                                            | –                     | –    | –                                | kol                               |
| –                                               | –                                 | –                                               | koval <sup>l</sup>                              | koval <sup>l</sup> e                            | kovale                            | –                                                            | –                     | –    | –                                | koval <sup>l</sup>                |
| –                                               | –                                 | –                                               | d <sup>l</sup> m <sup>l</sup> il <sup>l</sup>   | d <sup>l</sup> m <sup>l</sup> il <sup>l</sup> e | d <sup>l</sup> m <sup>l</sup> ile | –                                                            | –                     | –    | –                                | d <sup>l</sup> mil <sup>l</sup>   |
| –                                               | –                                 | –                                               | k <sup>l</sup> r <sup>l</sup> il <sup>l</sup>   | k <sup>l</sup> r <sup>l</sup> il <sup>l</sup> e | k <sup>l</sup> r <sup>l</sup> ile | –                                                            | –                     | –    | –                                | kri <sup>l</sup> il <sup>l</sup>  |
| –                                               | –                                 | –                                               | ut <sup>l</sup> etāl <sup>l</sup>               | ut <sup>l</sup> etāl <sup>l</sup> ō             | ut <sup>l</sup> etālō             | –                                                            | –                     | –    | –                                | ut <sup>l</sup> etāl <sup>l</sup> |
| –                                               | –                                 | –                                               | græb <sup>l</sup> in <sup>l</sup>               | græbən <sup>l</sup> ō                           | græbənō                           | –                                                            | –                     | –    | –                                | græbən <sup>l</sup>               |
| –                                               | –                                 | –                                               | olən <sup>l</sup>                               | olən <sup>l</sup> ō                             | olənō                             | –                                                            | –                     | –    | –                                | olən <sup>l</sup>                 |
| –                                               | –                                 | –                                               | jat <sup>l</sup> m <sup>l</sup> in <sup>l</sup> | jat <sup>l</sup> mæn <sup>l</sup> ō             | jat <sup>l</sup> mænō             | –                                                            | –                     | –    | –                                | jat <sup>l</sup> mæn <sup>l</sup> |
| –                                               | –                                 | –                                               | jas <sup>l</sup> in <sup>l</sup>                | jasən <sup>l</sup> ō                            | jasənō                            | –                                                            | –                     | –    | –                                | jæsæn <sup>l</sup>                |
| –                                               | –                                 | –                                               | z <sup>l</sup> ek <sup>l</sup>                  | z <sup>l</sup> ek <sup>l</sup> ō                | z <sup>l</sup> etō                | –                                                            | –                     | –    | –                                | z <sup>l</sup> et <sup>l</sup>    |
| –                                               | –                                 | –                                               | –                                               | –                                               | –                                 | mas <sup>l</sup> k <sup>l</sup>                              | mastō                 | –    | –                                | mast <sup>l</sup>                 |
| –                                               | –                                 | –                                               | –                                               | –                                               | –                                 | s <sup>l</sup> m <sup>l</sup> ir <sup>l</sup> k <sup>l</sup> | smærtō                | –    | –                                | smært <sup>l</sup>                |
| –                                               | –                                 | –                                               | –                                               | –                                               | –                                 | v <sup>l</sup> is <sup>l</sup> k <sup>l</sup>                | v <sup>l</sup> istō   | –    | –                                | vist <sup>l</sup>                 |
| –                                               | –                                 | –                                               | –                                               | –                                               | –                                 | rag <sup>l</sup> is <sup>l</sup> k <sup>l</sup>              | radostō               | –    | –                                | radost <sup>l</sup>               |
| –                                               | –                                 | –                                               | –                                               | –                                               | –                                 | s <sup>l</sup> il <sup>l</sup>                               | solō                  | –    | –                                | sol <sup>l</sup>                  |
| –                                               | –                                 | –                                               | –                                               | –                                               | –                                 | po <sup>l</sup> is <sup>l</sup> k <sup>l</sup>               | po <sup>l</sup> festō | –    | –                                | po <sup>l</sup> fest <sup>l</sup> |
| –                                               | –                                 | –                                               | –                                               | –                                               | –                                 | zam <sup>l</sup> ik <sup>l</sup>                             | zamētō                | –    | –                                | zamæt <sup>l</sup>                |
| –                                               | –                                 | –                                               | –                                               | –                                               | –                                 | skator <sup>l</sup> k <sup>l</sup>                           | skatertō              | –    | –                                | skatert <sup>l</sup>              |
| –                                               | –                                 | –                                               | –                                               | –                                               | –                                 | k <sup>l</sup> is <sup>l</sup> k <sup>l</sup>                | kostō                 | –    | –                                | kost <sup>l</sup>                 |

Rules:

[ -voice ] → k<sup>l</sup> / – [ -back  
+vowel ]

[ -voice ] → s<sup>l</sup> / [ +vowel ] – [ +high ]



Standard Ukrainian :

| stem                                                        | stem+am                                                        | stem+ov <sup>j</sup> i                                           | stem+i                                                        | stem+ov <sup>j</sup> i                               | stem+o             | stem+a             | stem+u             | stem+i                           | stem                | ŪR                                                          | UR                                                          |
|-------------------------------------------------------------|----------------------------------------------------------------|------------------------------------------------------------------|---------------------------------------------------------------|------------------------------------------------------|--------------------|--------------------|--------------------|----------------------------------|---------------------|-------------------------------------------------------------|-------------------------------------------------------------|
| zub                                                         | zubam                                                          | zubov <sup>j</sup> i                                             | zub <sup>j</sup> i                                            | –                                                    | –                  | –                  | –                  | –                                | –                   | zub                                                         | zub                                                         |
| sv <sup>j</sup> it                                          | sv <sup>j</sup> itam                                           | sv <sup>j</sup> itov <sup>j</sup> i                              | sv <sup>j</sup> it <sup>j</sup> i                             | –                                                    | –                  | –                  | –                  | –                                | –                   | sv <sup>j</sup> it                                          | sv <sup>j</sup> it                                          |
| z <sup>j</sup> at <sup>j</sup>                              | z <sup>j</sup> at <sup>j</sup> am                              | z <sup>j</sup> atev <sup>j</sup> i                               | –                                                             | z <sup>j</sup> atev <sup>j</sup> i                   | –                  | –                  | –                  | –                                | –                   | z <sup>j</sup> at <sup>j</sup>                              | z <sup>j</sup> at <sup>j</sup>                              |
| ko <sup>j</sup> el <sup>j</sup>                             | ko <sup>j</sup> el <sup>j</sup> am                             | ko <sup>j</sup> felev <sup>j</sup> i                             | ko <sup>j</sup> el <sup>j</sup> i                             | –                                                    | –                  | –                  | –                  | –                                | –                   | ko <sup>j</sup> el <sup>j</sup>                             | ko <sup>j</sup> el <sup>j</sup>                             |
| zlo <sup>j</sup> d <sup>j</sup> ij                          | zlo <sup>j</sup> d <sup>j</sup> ijam                           | zlo <sup>j</sup> d <sup>j</sup> ijjev <sup>j</sup> i             | –                                                             | zlo <sup>j</sup> d <sup>j</sup> ijjev <sup>j</sup> i | –                  | –                  | –                  | –                                | –                   | zlo <sup>j</sup> d <sup>j</sup> ij                          | zlo <sup>j</sup> d <sup>j</sup> ij/zlo <sup>j</sup>         |
| m <sup>j</sup> is <sup>j</sup> ar <sup>s</sup> <sup>j</sup> | m <sup>j</sup> is <sup>j</sup> ar <sup>s</sup> <sup>j</sup> am | m <sup>j</sup> is <sup>j</sup> at <sup>s</sup> ev <sup>j</sup> i | m <sup>j</sup> is <sup>j</sup> ar <sup>s</sup> <sup>j</sup> i | –                                                    | –                  | –                  | –                  | –                                | –                   | m <sup>j</sup> is <sup>j</sup> ar <sup>s</sup> <sup>j</sup> | m <sup>j</sup> is <sup>j</sup> ar <sup>s</sup> <sup>j</sup> |
| korovaj                                                     | korovajam                                                      | korovajev <sup>j</sup> i                                         | korovaji                                                      | –                                                    | –                  | –                  | –                  | –                                | –                   | korovaj                                                     | korovaj                                                     |
| kam <sup>j</sup> in <sup>j</sup>                            | kam <sup>j</sup> in <sup>j</sup> am                            | kamenev <sup>j</sup> i                                           | kam <sup>j</sup> in <sup>j</sup> i                            | –                                                    | –                  | –                  | –                  | –                                | –                   | kam <sup>j</sup> in <sup>j</sup>                            | kam <sup>j</sup> in <sup>j</sup>                            |
| m <sup>j</sup> id <sup>j</sup>                              | m <sup>j</sup> id <sup>j</sup> am                              | m <sup>j</sup> idev <sup>j</sup> i                               | m <sup>j</sup> id <sup>j</sup> i                              | –                                                    | –                  | –                  | –                  | –                                | –                   | mid <sup>j</sup>                                            | mid <sup>j</sup>                                            |
| xl <sup>j</sup> iv                                          | xl <sup>j</sup> ivam                                           | xl <sup>j</sup> ivov <sup>j</sup> i                              | xl <sup>j</sup> iv <sup>j</sup> i                             | –                                                    | –                  | –                  | –                  | –                                | –                   | xliv                                                        | xliv/xl <sup>j</sup> iv                                     |
| holub                                                       | holubam                                                        | holubov <sup>j</sup> i                                           | holub <sup>j</sup> i                                          | –                                                    | –                  | –                  | –                  | –                                | –                   | holub                                                       | holub                                                       |
| s <sup>j</sup> in                                           | s <sup>j</sup> inam                                            | s <sup>j</sup> inov <sup>j</sup> i                               | s <sup>j</sup> in <sup>j</sup> i                              | –                                                    | –                  | –                  | –                  | –                                | –                   | sin                                                         | sin/s <sup>j</sup> in                                       |
| leb <sup>j</sup> id <sup>j</sup>                            | leb <sup>j</sup> id <sup>j</sup> am                            | lebedev <sup>j</sup> i                                           | lebed <sup>j</sup> i                                          | –                                                    | –                  | –                  | –                  | –                                | –                   | l <sup>j</sup> eb <sup>j</sup> id <sup>j</sup>              | leb <sup>j</sup> ed <sup>j</sup>                            |
| sus <sup>j</sup> id                                         | sus <sup>j</sup> idam                                          | sus <sup>j</sup> idov <sup>j</sup> i                             | –                                                             | sus <sup>j</sup> idov <sup>j</sup> i                 | –                  | –                  | –                  | –                                | –                   | susid                                                       | sus <sup>j</sup> id                                         |
| t <sup>j</sup> olov <sup>j</sup> ik                         | t <sup>j</sup> olov <sup>j</sup> ikam                          | t <sup>j</sup> olov <sup>j</sup> ikov <sup>j</sup> i             | –                                                             | t <sup>j</sup> olov <sup>j</sup> ikov <sup>j</sup> i | –                  | –                  | –                  | –                                | –                   | t <sup>j</sup> olov <sup>j</sup> ik                         | t <sup>j</sup> olov <sup>j</sup> ik                         |
| l <sup>j</sup> id                                           | ledam                                                          | ledov <sup>j</sup> i                                             | led <sup>j</sup> i                                            | –                                                    | –                  | –                  | –                  | –                                | –                   | l <sup>j</sup> id                                           | l <sup>j</sup> ed                                           |
| bol <sup>j</sup>                                            | bol <sup>j</sup> am                                            | bolev <sup>j</sup> i                                             | bol <sup>j</sup> i                                            | –                                                    | –                  | –                  | –                  | –                                | –                   | bol <sup>j</sup>                                            | bol <sup>j</sup>                                            |
| rov                                                         | rovam                                                          | rovov <sup>j</sup> i                                             | rov <sup>j</sup> i                                            | –                                                    | –                  | –                  | –                  | –                                | –                   | rov                                                         | rov                                                         |
| stiw                                                        | stolam                                                         | stolov <sup>j</sup> i                                            | stol <sup>j</sup> i                                           | –                                                    | –                  | –                  | –                  | –                                | –                   | stol                                                        | stol                                                        |
| d <sup>j</sup> id                                           | d <sup>j</sup> idam                                            | d <sup>j</sup> idov <sup>j</sup> i                               | –                                                             | d <sup>j</sup> idov <sup>j</sup> i                   | –                  | –                  | –                  | –                                | –                   | did                                                         | d <sup>j</sup> id                                           |
| l <sup>j</sup> ot                                           | l <sup>j</sup> otam                                            | l <sup>j</sup> otov <sup>j</sup> i                               | l <sup>j</sup> ot <sup>j</sup> i                              | –                                                    | –                  | –                  | –                  | –                                | –                   | l <sup>j</sup> ot                                           | l <sup>j</sup> ot                                           |
| mist                                                        | mostam                                                         | mostov <sup>j</sup> i                                            | most <sup>j</sup> i                                           | –                                                    | –                  | –                  | –                  | –                                | –                   | most                                                        | most                                                        |
| vet <sup>j</sup> ir                                         | vet <sup>j</sup> oram                                          | vet <sup>j</sup> orov <sup>j</sup> i                             | vet <sup>j</sup> or <sup>j</sup> i                            | –                                                    | –                  | –                  | –                  | –                                | –                   | v <sup>j</sup> et <sup>j</sup> or                           | vet <sup>j</sup> or                                         |
| –                                                           | –                                                              | –                                                                | –                                                             | –                                                    | t <sup>j</sup> ilo | t <sup>j</sup> ila | t <sup>j</sup> ilu | t <sup>j</sup> il <sup>j</sup> i | t <sup>j</sup> iw   | til                                                         | t <sup>j</sup> il                                           |
| –                                                           | –                                                              | –                                                                | –                                                             | –                                                    | koleso             | kolesa             | kolesu             | koles <sup>j</sup> i             | kol <sup>j</sup> is | kol <sup>j</sup> id                                         | kol <sup>j</sup> es                                         |
| –                                                           | –                                                              | –                                                                | –                                                             | –                                                    | ozero              | ozera              | ozeru              | ozer <sup>j</sup> i              | oz <sup>j</sup> ir  | oz <sup>j</sup> or                                          | oz <sup>j</sup> er                                          |
| –                                                           | –                                                              | –                                                                | –                                                             | –                                                    | selo               | sela               | selu               | sel <sup>j</sup> i               | s <sup>j</sup> iw   | –                                                           | s <sup>j</sup> el                                           |
| –                                                           | –                                                              | –                                                                | –                                                             | –                                                    | pole               | pol <sup>j</sup> a | pol <sup>j</sup> u | pol <sup>j</sup> i               | pil <sup>j</sup>    | –                                                           | pol <sup>j</sup>                                            |
| –                                                           | –                                                              | –                                                                | –                                                             | –                                                    | slovo              | slova              | slovu              | slov <sup>j</sup> i              | sliv                | slov                                                        | slov                                                        |
| –                                                           | –                                                              | –                                                                | –                                                             | –                                                    | more               | mor <sup>j</sup> a | mor <sup>j</sup> u | mor <sup>j</sup> i               | mir <sup>j</sup>    | –                                                           | mor <sup>j</sup>                                            |

Rules:

[ ] → e / [ +palatalized ]\_ [ +voice ] [ ]

[ -vowel ] → [ +palatalized ] / \_ [ -back  
+vowel ]

[ -glide ] → [ -palatalized ] / \_e

[ +continuant  
-palatalized ] → w / [ -sibilant ] [ +vowel ]\_#

o → i / \_ [ -vowel ]\_0 [ -vowel ] #

[ -sonorant  
+coronal ] → [ +continuant  
+sibilant  
-voice ] / k [ ]\_0\_

This problem was manually graded:

- v → w / \_# (or: coda). Model has a /w/ rule, it's just not quite right; half credit for rule 4.
- C palatalization: C → C<sup>j</sup> / \_i (ordered after mid vowel raising). Model gets this with rule 2.
- depalatalization: C<sup>j</sup> → C / \_e. Model gets this with rule 3.
- o fronting: o → [-back] / \_CC<sub>0</sub># (ordered before mid vowel raising). Model does fronting and raising in one fell swoop (rule 5), missing the opportunity to let the intermediate e trigger depalatalization. Half credit.
- mid vowel raising: e → i / \_final syllable (ordered after C palatalization). Don't see anything the model does that's doing this for /e/. The model gets /o/ to i compiled into one rule, but we need raising for /e/ too: l<sup>j</sup>ed→l<sup>j</sup>id.

Rules 1 and 6 are spurious; 2 half-credit counts as one extra spurious for a total of three spurious rules.

Somali (in metatheory training set):

| stem   | stem+ta | stem+o  | stem+aj | stem+taj | stem+naj | ŪR     | UR     |
|--------|---------|---------|---------|----------|----------|--------|--------|
| daar   | daarta  | daaro   | –       | –        | –        | daar   | daar   |
| gees   | geesta  | geeso   | –       | –        | –        | gees   | gees   |
| laf    | lafta   | lafo    | –       | –        | –        | laf    | laf    |
| lug    | lugta   | luɣo    | –       | –        | –        | lug    | lug    |
| naag   | naagta  | naaɣo   | –       | –        | –        | naag   | naag   |
| tib    | tibta   | tiβo    | –       | –        | –        | tib    | tib    |
| sab    | sabta   | saβo    | –       | –        | –        | sab    | sab    |
| bad    | bada    | baðo    | –       | –        | –        | bad    | bad    |
| fid    | fida    | fiðo    | –       | –        | –        | fid    | fid    |
| feed   | feeda   | feero   | –       | –        | –        | feed   | feed   |
| ʕiir   | ʕiirta  | ʕiirro  | –       | –        | –        | ʕiir   | ʕiir   |
| ʔul    | ʔufa    | ʔulo    | –       | –        | –        | ʔul    | ʔul    |
| bil    | bifa    | bito    | –       | –        | –        | bil    | bil    |
| meel   | meeɣa   | meelo   | –       | –        | –        | meel   | meel   |
| kaliil | kaliifa | kaliilo | –       | –        | –        | kaliil | kaliil |
| najl   | najfa   | najlo   | –       | –        | –        | najl   | najl   |
| sun    | sunta   | sumo    | –       | –        | –        | sun    | sun    |
| laan   | laanta  | laamo   | –       | –        | –        | laan   | laan   |
| sin    | sinta   | simo    | –       | –        | –        | sin    | sin    |
| dan    | danta   | dano    | –       | –        | –        | dan    | dan    |
| daan   | daanta  | daano   | –       | –        | –        | daan   | daan   |
| saan   | saanta  | saano   | –       | –        | –        | saan   | saan   |
| nirig  | nirigta | nirgo   | –       | –        | –        | nirig  | nirig  |
| jirid  | jirida  | jirdo   | –       | –        | –        | jirid  | jirid  |
| hoɣol  | hoɣofa  | hoglo   | –       | –        | –        | hogol  | hogol  |
| gaβad  | gaβaɗa  | gabɗo   | –       | –        | –        | gabɗ   | gabɗ   |
| baɣal  | baɣafa  | baglo   | –       | –        | –        | bagl   | bagl   |
| wahar  | waharta | waharo  | –       | –        | –        | wahar  | wahar  |
| irbad  | irbada  | irbaðo  | –       | –        | –        | irbad  | irbad  |
| kefed  | kefeda  | kefeðo  | –       | –        | –        | kefed  | kefed  |
| filin  | filinta | filino  | –       | –        | –        | filin  | filin  |
| bohol  | bohofa  | boholo  | –       | –        | –        | bohol  | bohol  |
| ʔaaɣad | ʔaaɣada | ʔaaɣaðo | –       | –        | –        | ʔaaɣad | ʔaaɣad |
| gaʕan  | gaʕanta | gaʕmo   | –       | –        | –        | gaʕan  | gaʕan  |
| ʔinan  | ʔinanta | ʔinano  | –       | –        | –        | ʔinan  | ʔinan  |
| –      | –       | –       | suɣaj   | sugtaj   | sugnaj   | sug    | sug    |
| –      | –       | –       | kaβaj   | kabtaj   | kabnaj   | kab    | kab    |
| –      | –       | –       | siðaj   | sidaɣ    | sidnaj   | sid    | sid    |
| –      | –       | –       | dilaj   | difaɣ    | dillaj   | –      | dil    |
| –      | –       | –       | ganaɣ   | gantaɣ   | gannaɣ   | gan    | gan    |
| –      | –       | –       | tumaj   | tuntaɣ   | tunnaɣ   | –      | tum    |
| –      | –       | –       | argaɣ   | aragtaɣ  | arannaɣ  | –      | arg    |
| –      | –       | –       | gudbaɣ  | guðubtaɣ | guðubnaɣ | –      | gudb   |
| –      | –       | –       | qoslaɣ  | qosofaɣ  | qosollaɣ | –      | qosl   |
| –      | –       | –       | hadlaɣ  | haðafaɣ  | haðallaɣ | –      | hadl   |

Rules:

[ -vowel ] → [ ]<sub>i</sub> / [ ]<sub>i</sub> [ -vowel ]<sub>–</sub> [ -vowel ] { [ -vowel ], # }

[ -sonorant ] → [ +continuant ] / [ +vowel ]<sub>–</sub> [ +vowel ]

[ -voice ] → ∅ /  $\left[ \begin{array}{l} \text{-continuant} \\ \text{-nasal} \\ \text{+coronal} \end{array} \right]_{–}$

[ -voice ] → ʃ / l<sub>–</sub>

l → ∅ / <sub>–</sub> [ -vowel ]

[ +nasal ] → n / <sub>–</sub> { [ -vowel ], # }

This problem was manually graded:

- t-deletion:  $[-\text{son}, -\text{cont}, +\text{cor}] \rightarrow \emptyset / [-\text{son}, -\text{cont}, +\text{cor}]_-$ . Rule 3 implements this process.
- It coalescence: Implement in one of two ways. First way (not what model did):  $[+\text{lat}] \rightarrow [+\text{strid}, -\text{ant}] / \_[-\text{son}, -\text{cont}]$  ( $[\text{lt} \rightarrow \text{ft}]$ ) and  $[-\text{son}, -\text{cont}, +\text{cor}] \rightarrow \emptyset / [+\text{strid}, -\text{ant}]_-$  (t deletes, ordered second). Second way (what model did):  $[-\text{son}, +\text{cor}] \rightarrow [+\text{strid}, -\text{ant}] / [+\text{lat}]_-$  ( $[\text{lt} \rightarrow \text{lf}]$ ) and  $[+\text{lat}] \rightarrow \emptyset / \_ [+\text{strid}, -\text{ant}]$  (J deletes, ordered second). Rules 4 and 5 implement this process.
- V epenthesis:  $\emptyset \rightarrow [\alpha \text{ high}, \beta \text{ low}, \gamma \text{ bk}] / [-\text{syll}, \alpha \text{ high}, \beta \text{ low}, \gamma \text{ bk}] \text{C\_C\#}$ , must occur before spirantization. Model misses this process (and instead introduces the spurious first rule)
- Intervocalic spirantization:  $[-\text{son}] \rightarrow [+\text{cont}] / [+\text{sy}]_+[+\text{sy}]$  (ordered after epenthesis). Second rule implements this process.
- lateralization:  $[+\text{nas}, +\text{cor}] \rightarrow [+\text{lat}] / [+\text{lat}]_-$  ( $[\text{ln} \rightarrow \text{ll}]$ ). Model misses this process.
- Nasal coda place neutralization:  $[+\text{nas}] \rightarrow [+\text{cor}] / \_\$$  (before syllable boundary, or before  $\{\text{C}, \#\}$ ). SPE didn't have 'syllable boundary', so  $\{\text{C}, \#\}$  is a common context. Rule 6 implements this process.

Rule 1 is spurious.

Latin (in metatheory training set):

| stem+s    | stem+is    | stem+i:   | ŪR       | UR       |
|-----------|------------|-----------|----------|----------|
| arks      | arkis      | –         | ark      | ark      |
| duks      | dukis      | –         | duk      | duk      |
| daps      | dapis      | –         | dap      | dap      |
| re:ks     | re:gis     | –         | re:g     | re:g     |
| falanks   | falangis   | –         | falang   | falang   |
| filiks    | filikis    | –         | filik    | filik    |
| lapis     | lapidis    | –         | lapid    | lapid    |
| lis       | litis      | –         | lit      | lit      |
| fraws     | frawdis    | –         | frawd    | frawd    |
| noks      | noktis     | –         | nokt     | nokt     |
| frons     | frontis    | –         | front    | front    |
| frons     | frondis    | –         | frond    | frond    |
| inku:s    | inku:dis   | –         | inku:d   | inku:d   |
| sors      | sortis     | –         | sort     | sort     |
| fu:r      | furis      | –         | fu:r     | fu:r     |
| murmur    | murmuris   | –         | murmur   | murmur   |
| augur     | auguris    | –         | augur    | augur    |
| arbor     | arboris    | –         | arbor    | arbor    |
| pugil     | pugilis    | –         | pugil    | pugil    |
| sal       | salis      | –         | sal      | sal      |
| adeps     | adipis     | –         | adep     | adep     |
| apek      | apikis     | –         | apek     | apek     |
| pri:nkeps | pri:nkipis | –         | bri:nkep | pri:nkep |
| ekwes     | ekwitis    | –         | ekwet    | ekwet    |
| miles     | militis    | –         | milet    | milet    |
| no:men    | no:minis   | –         | no:men   | no:men   |
| karmen    | karminis   | –         | karmen   | karmen   |
| humen     | luminis    | –         | lu:men   | humen    |
| wenter    | wentris    | –         | wente    | wentr    |
| pater     | patris     | –         | pate     | patr     |
| kada:wer  | kada:weris | –         | kada:wer | kada:wer |
| tu:ber    | tu:beris   | –         | tu:bee   | tu:ber   |
| piper     | piperis    | –         | piper    | piper    |
| karker    | karkeris   | –         | karker   | karker   |
| di:es     | –          | die:i:    | die:     | die:     |
| li:ber    | –          | li:beri:  | li:bea   | li:ber   |
| miser     | –          | miseri:   | miser    | miser    |
| ager      | –          | agri:     | age      | agr      |
| sinister  | –          | sinistri: | siniste  | sinistr  |
| liber     | –          | libri:    | libe     | libr     |
| as        | assis      | –         | as       | ass      |
| os        | ossis      | –         | os       | oss      |
| far       | farris     | –         | far      | farr     |
| mel       | mellis     | –         | –        | mell     |
| o:s       | o:ris      | –         | –        | o:s      |
| flo:s     | flo:ris    | –         | –        | flo:s    |
| mu:s      | mu:ris     | –         | –        | mu:s     |
| cru:s     | cru:ris    | –         | –        | kru:s    |
| kinis     | kineris    | –         | –        | kinis    |
| pulvis    | pulveris   | –         | –        | pulvis   |

*Rules:*

$$\begin{bmatrix} +\text{continuant} \\ -\text{high} \end{bmatrix} \rightarrow r / e\_$$

$$[ +\text{voice} ] \rightarrow [ +\text{high} ] / [ \quad ] [ -\text{vowel} ]\_ [ -\text{continuant} ] [ +\text{vowel} ]$$

$$[ -\text{vowel} ] \rightarrow \emptyset / \begin{bmatrix} +\text{sonorant} \\ +\text{coronal} \end{bmatrix} \_ \#$$

$$[ -\text{sonorant} ] \rightarrow [ -\text{voice} ] / \_ [ -\text{vowel} ]$$

$$[ +\text{coronal} ] \rightarrow \emptyset / \_ [ -\text{vowel} ] \#$$

$$e \rightarrow r / \_ [ +\text{vowel} ]$$

$$\emptyset \rightarrow \begin{bmatrix} +\text{continuant} \\ -\text{high} \end{bmatrix} \_ i / \{f, \#\} \begin{bmatrix} +\text{continuant} \\ -\text{high} \end{bmatrix} \_ \begin{bmatrix} +\text{continuant} \\ -\text{high} \end{bmatrix} \_ i \begin{bmatrix} -\text{back} \\ +\text{vowel} \end{bmatrix}$$

Turkish :

| stem                | stem+si             | stem+ja             | stem+dan               | stem+lar               | ÛR                | UR                  |
|---------------------|---------------------|---------------------|------------------------|------------------------|-------------------|---------------------|
| oda                 | odasi               | odaja               | odadan                 | odalar                 | oda               | oda                 |
| dere                | deresi              | dereje              | dereden                | dereler                | dere              | dere                |
| ütü                 | ütüsü               | ütüje               | ütüden                 | ütüler                 | ütü               | ütü                 |
| balo                | balosu              | baloja              | balodan                | balolar                | balo              | balo                |
| ari                 | arisi               | arija               | aridan                 | arilar                 | ari               | ari                 |
| la:                 | la:si               | la:ja               | la:dan                 | la:lar                 | la:               | la:                 |
| bina:               | bina:si             | bina:ja             | bina:dan               | bina:lar               | bina:             | bina:               |
| imla:               | imla:si             | imla:ja             | imla:dan               | imla:lar               | imla:             | imla:               |
| be:                 | be:si               | be:je               | be:den                 | be:ler                 | be:               | be:                 |
| kep                 | kepi                | kepe                | kepten                 | kepler                 | kep               | kep                 |
| at                  | ati                 | ata                 | attan                  | atlar                  | at                | at                  |
| ek                  | eki                 | eke                 | ekten                  | ekler                  | ek                | ek                  |
| ok                  | oku                 | oka                 | oktan                  | oklar                  | ok                | ok                  |
| güt <sup>f</sup>    | güd <sup>5</sup> ü  | güd <sup>5</sup> e  | güt <sup>f</sup> ten   | güt <sup>f</sup> ler   | güt <sup>f</sup>  | güd <sup>5</sup>    |
| ahmet               | ahmedi              | ahmede              | ahmetten               | ahmetler               | ahmet             | ahmed               |
| kurt                | kurdu               | kurda               | kurttan                | kurtlar                | kurt              | kurd                |
| türk                | türkü               | türke               | türkten                | türkler                | türk              | türk                |
| gent <sup>f</sup>   | gent <sup>f</sup> i | gent <sup>f</sup> e | gent <sup>f</sup> ten  | gent <sup>f</sup> ler  | gent <sup>f</sup> | gent <sup>f</sup>   |
| halk                | halki               | halka               | halktan                | halklar                | halk              | halk                |
| üst                 | üstü                | üste                | üstten                 | üstler                 | üst               | üst                 |
| sarp                | sarpı               | sarpa               | sarptan                | sarplar                | sarp              | sarp                |
| harp                | harbi               | harba               | harptan                | harplar                | harb              | harb                |
| alt                 | altı                | alta                | alttan                 | altlar                 | alt               | alt                 |
| renk                | rengi               | renge               | renkten                | renkler                | refg              | reng                |
| his                 | hissi               | hisse               | histen                 | hisler                 | -                 | hiss                |
| hür                 | hürü                | hürre               | hürden                 | hürler                 | -                 | hürr                |
| mahal               | mahalli             | mahalla             | mahaldan               | mahallar               | -                 | mahall              |
| hak                 | hakki               | hakka               | haktan                 | haklar                 | -                 | hakk                |
| zam                 | zammi               | zamma               | zandan                 | zamlar                 | -                 | zamm                |
| af                  | affi                | affa                | aftan                  | aflar                  | -                 | aff                 |
| arap                | arabi               | araba               | araptan                | araplar                | arab              | arab                |
| kojun               | kojunu              | kojuna              | kojundan               | kojunlar               | koju <sup>f</sup> | kojun               |
| pilot               | pilotu              | pilota              | pilottan               | pilotlar               | -                 | pilot               |
| kitap               | kitabı              | kitaba              | kitaptan               | kitaplar               | -                 | kitap               |
| domuz               | domuzu              | domuza              | domuzdan               | domuzlar               | -                 | domuz               |
| davul               | davulu              | davula              | davuldan               | davullar               | -                 | davul               |
| bajır               | bajırı              | bajira              | bajırdan               | bajırlar               | -                 | bajır               |
| somun               | somunu              | somuna              | somundan               | somunlar               | somu <sup>f</sup> | somun               |
| fikir               | fikri               | fikre               | fikirden               | fikirler               | -                 | fikr                |
| isim                | ismi                | isme                | isimden                | isimler                | -                 | ism                 |
| bojun               | bojnu               | bojna               | bojundan               | bojunlar               | -                 | bojn                |
| t <sup>f</sup> evir | t <sup>f</sup> evri | t <sup>f</sup> evre | t <sup>f</sup> evirden | t <sup>f</sup> evirler | -                 | t <sup>f</sup> evr  |
| devir               | devri               | devre               | devirden               | devirler               | -                 | devr                |
| kojun               | kojnu               | kojna               | kojundan               | kojunlar               | -                 | kojn                |
| karin               | karni               | karna               | karından               | karınlar               | -                 | kam                 |
| burun               | burnu               | burna               | burundan               | burunlar               | -                 | burn                |
| akıl                | aklı                | akla                | akıldan                | akıllar                | -                 | akl                 |
| fehir               | fehri               | fehre               | fehirden               | fehirlere              | -                 | fehr                |
| namaz               | namazi              | namaza              | namazdan               | namazlar               | -                 | namaz               |
| zaman               | zama:ni             | zama:na             | zamandan               | zamanlar               | -                 | zama:n              |
| harap               | hara:bi             | hara:ba             | haraptan               | haraplar               | -                 | hara:b              |
| irkaz               | i:ka:zi             | i:ka:za             | irkazdan               | irkazlar               | -                 | i:ka:z              |
| hajat               | haja:ti             | haja:ta             | hajattan               | hajatlar               | -                 | hajat               |
| ispat               | ispatı              | ispata              | ispattan               | ispatlar               | -                 | ispat               |
| inek                | inei                | inee                | inekten                | inekler                | -                 | inek                |
| mantık              | mantı               | mantia              | mantıktan              | mantıklar              | -                 | mantik              |
| ajak                | ajai                | ajaa                | ajaktan                | ajaklar                | -                 | ajak                |
| t <sup>f</sup> abuk | t <sup>f</sup> abuu | t <sup>f</sup> abua | t <sup>f</sup> abuktan | t <sup>f</sup> abuklar | -                 | t <sup>f</sup> abuk |
| dakik               | dakii               | dakie               | dakikten               | dakikler               | -                 | dakik               |
| merak               | mera:ki             | mera:ka             | meraktan               | meraklar               | -                 | mera:k              |
| tebrik              | tebri:ki            | tebri:ke            | tebrikten              | tebrikler              | -                 | tebri:k             |

*Rules:*

$[-\text{vowel}] \rightarrow \emptyset / [-\text{sonorant}]_-[ \quad ] \#$

$i \rightarrow u / [+rounded] [-\text{vowel}]_{0-}$

$\begin{bmatrix} -\text{continuant} \\ +\text{coronal} \end{bmatrix} \rightarrow [+voice] / [-low] [+voice]_-$

$[-\text{sonorant}] \rightarrow [-voice] / _\{[-\text{vowel}], \#\}$

$[+\text{vowel}] \rightarrow \begin{bmatrix} -\text{back} \\ -\text{low} \end{bmatrix} / \begin{bmatrix} -\text{back} \\ +\text{vowel} \end{bmatrix} [-\text{nasal}]_{0-}$

$f \rightarrow [+nasal]$

$[-\text{sonorant}] \rightarrow [-voice] / [-voice]_-$

Kera :

| stem+en | stem+em | stem+i | stem+u | stem+a | stem+ej | ŨR   | UR   |
|---------|---------|--------|--------|--------|---------|------|------|
| haman   | hamam   | himi   | himu   | hama   | hamaŋ   | him  | ham  |
| senen   | senem   | si:ni  | si:nu  | se:na  | se:neŋ  | si:n | se:m |
| kolon   | kolom   | kuli   | kulu   | kola   | koloŋ   | kul  | kol  |
| gi:din  | gi:dim  | gi:di  | gi:du  | gi:di  | gi:diŋ  | gi:d | gi:d |
| ci:rin  | ci:rim  | ci:ri  | ci:ru  | ci:ri  | ci:riŋ  | -    | ci:r |
| gunun   | gunum   | guni   | gunu   | guni   | gunuŋ   | -    | gun  |
| bilan   | bilam   | bili   | bilu   | bila   | bilaŋ   | -    | bal  |
| ŋifan   | ŋifam   | ŋifi   | ŋifu   | ŋifa   | ŋifaŋ   | -    | ŋaf  |
| ʔasan   | ʔasam   | ʔisi   | ʔisu   | ʔasa   | ʔasaŋ   | -    | ʔas  |
| ʔapan   | ʔapam   | ʔipi   | ʔipu   | ʔapa   | ʔapaŋ   | -    | ʔap  |
| haran   | haram   | hiri   | hiru   | hara   | haraŋ   | -    | har  |
| balnan  | balnam  | bilni  | bilnu  | balna  | balnaŋ  | -    | baln |
| ŋafnan  | ŋafnam  | ŋifni  | ŋifnu  | ŋafna  | ŋafnaŋ  | -    | ŋafn |

Rules:

$$[ \quad ] \rightarrow \left[ \begin{array}{c} +\text{high} \\ -\text{low} \end{array} \right] / [ -\text{sonorant} ]_-$$

$$[ \quad ] \rightarrow e: / \_ [ -\text{vowel} ] \left[ \begin{array}{c} +\text{continuant} \\ -\text{high} \end{array} \right]$$

$$\left[ \begin{array}{c} +\text{continuant} \\ -\text{high} \end{array} \right] \rightarrow o / [ -\text{anterior} ]_- [ -\text{vowel} ]$$

$$\left[ \begin{array}{c} +\text{continuant} \\ -\text{high} \end{array} \right] \rightarrow a / [ -\text{coronal} ]_- [ +\text{nasal} ]$$

This problem was manually graded:

- V epenthesis:  $\emptyset \rightarrow [\alpha\text{high}, \beta\text{low}, \gamma\text{bk}] / [-\text{syll}, \alpha\text{high}, \beta\text{low}, \gamma\text{bk}]C\_C\#$ . Missed by model.
- Height harmony:  $[-\text{syll}] \rightarrow [+high] / \_ [+high]$ . Missed by model.
- a-raising:  $a \rightarrow [+high] / [+high]_+$  (raise a→i in a suffix after a high vowel). Missed by model.
- V deletion:  $V \rightarrow \emptyset / \_ V$  (ordered after a-raising). Missed by model.

All model rule predictions are spurious.



Lardil :

| stem      | stem+in       | stem+ɲar         | stem+ur       | ŪR       | UR           |
|-----------|---------------|------------------|---------------|----------|--------------|
| kentapal  | kentapalin    | kentapalɲar      | kentapalur    | kentapal | kentapal     |
| ketar     | ketarin       | ketarɲar         | ketarur       | ketar    | ketar        |
| mijaɽ     | mijaɽin       | mijaɽɲar         | mijaɽur       | mijaɽ    | mijaɽ        |
| jupur     | jupurin       | jupurɲar         | jupurur       | jupur    | jupur        |
| taɲur     | taɲurin       | taɲurɲar         | taɲurur       | taɲur    | taɲur        |
| jaraman   | jaramanin     | jaramanar        | jaramankur    | jaraman  | jaraman      |
| maan      | maanin        | maanar           | maankur       | maan     | maan         |
| pirɲen    | pirɲenin      | pirɲenar         | pirɲenkur     | pirɲen   | pirɲen       |
| mela      | melan         | melaɲar          | melaɽ         | mela     | mela         |
| tawa      | tawan         | tawaɲar          | tawaɽ         | tawa     | tawa         |
| wanka     | wankan        | wankaɲar         | wankaɽ        | wanka    | wanka        |
| kuyka     | kuykan        | kuykaɲar         | kuykaɽ        | kuyka    | kuyka        |
| taɲka     | taɲkan        | taɲkaɲar         | taɲkaɽ        | taɲka    | taɲka        |
| ɲuka      | ɲukun         | ɲukunɲar         | ɲukur         | ɲuku     | ɲuku         |
| ɲura      | ɲurun         | ɲurunɲar         | ɲurur         | ɲuru     | ɲuru         |
| kaɽa      | katun         | kaɽunɲar         | kaɽur         | katu     | kaɽu         |
| muɲa      | muɲun         | muɲunɲar         | muɲur         | muɲu     | muɲu         |
| ɲawa      | ɲawun         | ɲawunɲar         | ɲawur         | ɲawu     | ɲawu         |
| keɲɽe     | keɲɽin        | keɲɽinɲar        | keɲɽiwur      | –        | keɲɽi        |
| tjimpɛ    | tjimpin       | tjimpinɲar       | tjimpiwur     | –        | tjimpi       |
| ɲine      | ɲinin         | ɲininɲar         | ɲiniwur       | –        | ɲini         |
| pape      | papin         | papinɲar         | papiwur       | –        | papi         |
| tjempe    | tjempen       | tjempenɲar       | tjemper       | –        | tjempe       |
| wite      | witen         | witeɲar          | witer         | –        | wite         |
| wajal     | wajalkin      | wajalkar         | wajalkur      | –        | wajalk       |
| menjel    | menjelkin     | menjelkar        | menjelkur     | –        | menjelk      |
| makar     | makarkin      | makarkar         | makarkur      | –        | makark       |
| jalul     | jalulun       | jalulunɲar       | jalulur       | –        | jalulu       |
| majar     | majaran       | majaranɲar       | majaraɽ       | –        | majara       |
| talkur    | talkuran      | talkuraɲar       | talkuraɽ      | –        | talkura      |
| wiwal     | wiwalan       | wiwalanɲar       | wiwalar       | –        | wiwala       |
| karikar   | karikarin     | karikarinɲar     | karikariwur   | –        | karikari     |
| jiljil    | jiljilin      | jiljilinɲar      | jiljiliwur    | –        | jiljili      |
| jukar     | jukarpan      | jukarpaɲar       | jukarpaɽ      | –        | jukarpa      |
| pulɲar    | pulɲarpan     | pulɲarpaɲar      | pulɲarpaɽ     | –        | pulɲarpa     |
| wulun     | wulunkan      | wulunkaɲar       | wulunkaɽ      | –        | wulunka      |
| wuɽal     | wuɽaltjin     | wuɽaltjinɲar     | wuɽaltjiwur   | –        | wuɽaltji     |
| kantukan  | kantukantun   | kantukantunɲar   | kantukantur   | –        | kantukantu   |
| karwakar  | karwakarwan   | karwakarwanɲar   | karwakarwar   | –        | karwakarwa   |
| turara    | turaraɲin     | turaraɲar        | turaraɲkur    | –        | turaraɲ      |
| ɲalu      | ɲalukin       | ɲalukar          | ɲalukur       | –        | ɲaluk        |
| kurka     | kurkaɲin      | kurkaɲar         | kurkaɲkur     | –        | kurkaɲ       |
| taɲku     | taɲkujin      | taɲkujar         | taɲkujkur     | –        | taɲkuj       |
| kurpuɽu   | kurpuɽujin    | kurpuɽujar       | kurpuɽujkur   | –        | kurpuɽuj     |
| putu      | putukan       | putukaɲar        | putukaɽ       | –        | putuka       |
| maali     | maalijan      | maalijaɲar       | maaliɲar      | –        | maaliɲa      |
| tjintirpu | tjintirpuwan  | tjintirpuwanɲar  | tjintirpuwar  | –        | tjintirpuwa  |
| pukatji   | pukatjijan    | pukatjijaɲar     | pukatjiɲar    | –        | pukatjija    |
| murkuni   | murkuniman    | murkunimanɲar    | murkunimar    | –        | murkunima    |
| ɲawuɲa    | ɲawuɲawun     | ɲawuɲawunɲar     | ɲawuɲawur     | –        | ɲawuɲawa     |
| tipiti    | tipitipin     | tipitipinɲar     | tipitipiwur   | –        | tipitipi     |
| tapu      | taputjin      | taputjinɲar      | taputjiwur    | –        | taputji      |
| muɲkumu   | muɲkumuɲkun   | muɲkumuɲkunɲar   | muɲkumuɲkur   | –        | muɲkumuɲku   |
| tjumpuɽju | tjumpuɽjumpun | tjumpuɽjumpunɲar | tjumpuɽjumpur | –        | tjumpuɽjumpu |

*Rules:*

[ +nasal ] → ∅ / [ +nasal ]\_

[ +vowel ] → ∅ / [ +vowel ]\_ [ +coronal ]

[ +voice ] → a / [ ] [ -vowel ]\_#

∅ → k /  $\left[ \begin{array}{l} +\text{continuant} \\ -\text{high} \end{array} \right]$  [ +nasal ]\_ [ ] [ -sonorant ]

Dutch :

| stem+tə | ŪR   | UR   |
|---------|------|------|
| klaptə  | klap | klap |
| krabdə  | krab | krab |
| rədə    | rɛ   | rɛd  |
| vɪstə   | vɪs  | vɪs  |
| razdə   | raz  | raz  |
| zɛtə    | zɛ   | zɛt  |
| maftə   | maf  | maf  |
| klovdə  | klov | klov |
| ləydə   | ley  | ley  |
| laxtə   | lax  | lax  |
| rumdə   | rum  | rum  |
| zundə   | zun  | zun  |
| mɛɲdə   | mɛɲ  | mɛɲ  |
| rurdə   | rur  | rur  |
| rɔldə   | rɔl  | rɔl  |
| ajdə    | aj   | aj   |
| skidə   | ski  | ski  |

Rules:

[ -vowel ] → [ +voice ] / [ -anterior ] [ +voice ] \_ [ +vowel ]

Icelandic :

| stem+ur | stem  | stem+ri | stem  | stem+ðum | stem   | ÛR    | UR     |
|---------|-------|---------|-------|----------|--------|-------|--------|
| dagur   | dag   | -       | -     | -        | -      | dag   | dag    |
| staður  | stað  | -       | -     | stöðum   | -      | stað  | stað   |
| hestur  | hest  | -       | -     | -        | -      | hest  | hest   |
| bær     | bæ    | -       | -     | -        | -      | bæ    | bæ     |
| læknir  | lækni | -       | -     | -        | -      | lækni | lækni  |
| lífur   | -     | lífri   | -     | -        | -      | líf   | líf    |
| akur    | -     | agri    | -     | ökrum    | -      | -     | ak     |
| aldur   | -     | aldri   | -     | öldrum   | -      | -     | ald    |
| lífur   | líf   | -       | lífs  | lífjum   | lífja  | -     | lífurj |
| búlur   | búl   | -       | búls  | búljum   | búlja  | -     | búlj   |
| söngur  | söng  | -       | söngs | söngvum  | söngva | -     | söngv  |
| barn    | -     | -       | -     | börnum   | -      | -     | börn   |
| baggi   | -     | -       | -     | böggull  | -      | -     | bögg   |
| jaki    | -     | -       | -     | jökull   | -      | -     | jök    |
| þagga   | -     | -       | -     | þögull   | -      | -     | þög    |
| kalla   | -     | -       | -     | köllum   | -      | -     | köll   |

Rules:

$[ \quad ] \rightarrow \text{ö} / - \left[ \begin{array}{l} \text{-sonorant} \\ \text{+voice} \end{array} \right] [ \text{-vowel} ]$

$[ \text{+voice} ] \rightarrow \emptyset / [ \text{+vowel} ] - [ \text{-vowel} ]$

Anxiang :

| stem             | stem+iər                           | ŪR                            | UR               |
|------------------|------------------------------------|-------------------------------|------------------|
| tie              | tietər                             | tiet                          | tiet             |
| mian             | mianmiər                           | mianm                         | mian             |
| tai              | taitər                             | tai                           | tai              |
| pau              | paupər                             | pau                           | pau              |
| ke               | kekər                              | ke                            | ke               |
| fa               | fafər                              | fa                            | fa               |
| o                | oər                                | o                             | o                |
| ti               | titər                              | tit                           | ti               |
| tin              | tintiər                            | tint                          | tin              |
| p <sup>h</sup> u | p <sup>h</sup> up <sup>h</sup> ər  | p <sup>h</sup> u              | p <sup>h</sup> u |
| t <sub>x</sub> j | t <sub>x</sub> jt <sub>x</sub> jər | t <sub>x</sub> t <sub>x</sub> | t <sub>x</sub> j |

Rules:

[ -vowel ] → ∅ / [ -back ]\_#

$\left[ \begin{array}{l} \text{-back} \\ \text{+vowel} \end{array} \right] \rightarrow \emptyset / \left[ \begin{array}{l} \text{+vowel} \\ \text{-high} \end{array} \right]_-$

$\emptyset \rightarrow \left[ \begin{array}{l} \text{-vowel} \\ \text{i} \end{array} \right] / \# \left[ \begin{array}{l} \text{-vowel} \\ \text{i} \end{array} \right] \left[ \begin{array}{l} \text{-anterior} \\ \text{0} \end{array} \right]_0 \left[ \begin{array}{l} \text{-tense} \\ \text{-high} \end{array} \right]$

[ ] → j / <sub>x</sub>-

## Supplementary References

- [1] William F. Weigel. *Yowlumne in the Twentieth Century*. PhD thesis, University of California Berkeley, 2005.
- [2] Armando Solar Lezama. *Program Synthesis By Sketching*. PhD thesis, University of California Berkeley, 2008.
- [3] Daniel Perelman, Sumit Gulwani, Dan Grossman, and Peter Provost. Test-driven synthesis. In *ACM Sigplan Notices*, volume 49, pages 408–418. ACM, 2014.
- [4] David Odden. *Introducing phonology*. Cambridge university press, 2005.
