# Supplementary material for: Synthesizing theories of human language with Bayesian program induction
Source: PubMed Central journal article supplement (PMC9427767; doi:10.1038/s41467-022-32012-w), 2022-08-30
Supplement: 41467_2022_32012_MOESM3_ESM.pdf [file 41467_2022_32012_MOESM3_ESM.pdf]

## Reporting Summary

Nature Portfolio wishes to improve the reproducibility of the work that we publish. This form provides structure for consistency and transparency in reporting. For further information on Nature Portfolio policies, see our [Editorial Policies](#) and the [Editorial Policy Checklist](#).

### Statistics

For all statistical analyses, confirm that the following items are present in the figure legend, table legend, main text, or Methods section.

n/a Confirmed

- |                                     |                                     |                                                                                                                                                                                                                                                            |
|-------------------------------------|-------------------------------------|------------------------------------------------------------------------------------------------------------------------------------------------------------------------------------------------------------------------------------------------------------|
| <input type="checkbox"/>            | <input checked="" type="checkbox"/> | The exact sample size ( $n$ ) for each experimental group/condition, given as a discrete number and unit of measurement                                                                                                                                    |
| <input checked="" type="checkbox"/> | <input type="checkbox"/>            | A statement on whether measurements were taken from distinct samples or whether the same sample was measured repeatedly                                                                                                                                    |
| <input type="checkbox"/>            | <input checked="" type="checkbox"/> | The statistical test(s) used AND whether they are one- or two-sided<br><i>Only common tests should be described solely by name; describe more complex techniques in the Methods section.</i>                                                               |
| <input checked="" type="checkbox"/> | <input type="checkbox"/>            | A description of all covariates tested                                                                                                                                                                                                                     |
| <input checked="" type="checkbox"/> | <input type="checkbox"/>            | A description of any assumptions or corrections, such as tests of normality and adjustment for multiple comparisons                                                                                                                                        |
| <input type="checkbox"/>            | <input checked="" type="checkbox"/> | A full description of the statistical parameters including central tendency (e.g. means) or other basic estimates (e.g. regression coefficient) AND variation (e.g. standard deviation) or associated estimates of uncertainty (e.g. confidence intervals) |
| <input type="checkbox"/>            | <input checked="" type="checkbox"/> | For null hypothesis testing, the test statistic (e.g. $F$ , $t$ , $r$ ) with confidence intervals, effect sizes, degrees of freedom and $P$ value noted<br><i>Give <math>P</math> values as exact values whenever suitable.</i>                            |
| <input type="checkbox"/>            | <input checked="" type="checkbox"/> | For Bayesian analysis, information on the choice of priors and Markov chain Monte Carlo settings                                                                                                                                                           |
| <input checked="" type="checkbox"/> | <input type="checkbox"/>            | For hierarchical and complex designs, identification of the appropriate level for tests and full reporting of outcomes                                                                                                                                     |
| <input type="checkbox"/>            | <input checked="" type="checkbox"/> | Estimates of effect sizes (e.g. Cohen's $d$ , Pearson's $r$ ), indicating how they were calculated                                                                                                                                                         |

*Our web collection on [statistics for biologists](#) contains articles on many of the points above.*

### Software and code

Policy information about [availability of computer code](#)

Data collection

Data analysis

For manuscripts utilizing custom algorithms or software that are central to the research but not yet described in published literature, software must be made available to editors and reviewers. We strongly encourage code deposition in a community repository (e.g. GitHub). See the Nature Portfolio [guidelines for submitting code & software](#) for further information.

### Data

Policy information about [availability of data](#)

All manuscripts must include a [data availability statement](#). This statement should provide the following information, where applicable:

- Accession codes, unique identifiers, or web links for publicly available datasets
- A description of any restrictions on data availability
- For clinical datasets or third party data, please ensure that the statement adheres to our [policy](#)

The language data used and generated in this study have been deposited in GitHub at [https://github.com/ellisk42/bpl\\_phonology](https://github.com/ellisk42/bpl_phonology) along with the accompanying source code (DOI 0.5281/zenodo.6578329) under the GPLv3 license. The numerical data generated in this study are provided in the Source Data file.

## Field-specific reporting

Please select the one below that is the best fit for your research. If you are not sure, read the appropriate sections before making your selection.

Life sciences       Behavioural & social sciences       Ecological, evolutionary & environmental sciences

For a reference copy of the document with all sections, see [nature.com/documents/nr-reporting-summary-flat.pdf](https://www.nature.com/documents/nr-reporting-summary-flat.pdf)

## Behavioural & social sciences study design

All studies must disclose on these points even when the disclosure is negative.

|                   |                                                                                                                                                                                                                                                                                                                                                                                                                                                                                                                                                                                                                                                                                                                  |
|-------------------|------------------------------------------------------------------------------------------------------------------------------------------------------------------------------------------------------------------------------------------------------------------------------------------------------------------------------------------------------------------------------------------------------------------------------------------------------------------------------------------------------------------------------------------------------------------------------------------------------------------------------------------------------------------------------------------------------------------|
| Study description | We performed a quantitative study using computational simulations on linguistic corpora and randomly generated artificial grammar learning stimuli. We did not collect or use any data from human participants.                                                                                                                                                                                                                                                                                                                                                                                                                                                                                                  |
| Research sample   | We collected and transcribed 70 linguistic corpora from textbook exercises and examples. They were selected to exemplify a range of linguistic phenomena and difficulty levels. The three textbooks we used were Introducing Phonology (David Odde), A Workbook in Phonology (Iggy Roca and Wyn Johnson), and Problem Book in Phonology (Morris Halle and George Clements). We also created synthetic data for artificial grammar learning simulations. The synthetic data comprised 3 syllable words, with each syllable having one consonant and one vowel, with the consonant drawn uniformly at random from a set of 21 possible consonants and the vowel drawn uniformly at random from a set of 11 vowels. |
| Sampling strategy | We randomly sampled 15 problems to manually evaluate (grade) the predicted phonological rules. We chose this sample size because manually grading is a labor intensive process, involving consultation with a professional phonologist, and this sample of 15 sufficed to establish a statistically significant correlation between rule accuracy and lexicon accuracy (Figure 5C). For each artificial grammar learning stimulus, we randomly sampled 30 test words drawn as described under "Research sample", and structured them into 15 word-pairs for log-odds ratio computations. This sample size was chosen because it showed that the distribution of log-odds ratios was low variance.                |
| Data collection   | We did not collect any data from human participants.                                                                                                                                                                                                                                                                                                                                                                                                                                                                                                                                                                                                                                                             |
| Timing            | We collected data from Introducing Phonology from September 18 2016 until September 16 2017. We collected data from A Workbook in Phonology and Problem Book in Phonology from January 24, 2019 to February 25, 2019                                                                                                                                                                                                                                                                                                                                                                                                                                                                                             |
| Data exclusions   | We excluded phonology problems requiring autosegmental tiered representations. These are presented as an advanced topic in the last chapter of Odde's Introducing Phonology, and do not conform to the Sound Patterns of English rule format. There are 3 such problems, and we excluded them from the outset of data set creation.                                                                                                                                                                                                                                                                                                                                                                              |
| Non-participation | n/a, because we did not have human participants                                                                                                                                                                                                                                                                                                                                                                                                                                                                                                                                                                                                                                                                  |
| Randomization     | n/a, because we did not have human participants                                                                                                                                                                                                                                                                                                                                                                                                                                                                                                                                                                                                                                                                  |

## Reporting for specific materials, systems and methods

We require information from authors about some types of materials, experimental systems and methods used in many studies. Here, indicate whether each material, system or method listed is relevant to your study. If you are not sure if a list item applies to your research, read the appropriate section before selecting a response.

### Materials & experimental systems

| n/a                                 | Involvement in the study                               |
|-------------------------------------|--------------------------------------------------------|
| <input checked="" type="checkbox"/> | <input type="checkbox"/> Antibodies                    |
| <input checked="" type="checkbox"/> | <input type="checkbox"/> Eukaryotic cell lines         |
| <input checked="" type="checkbox"/> | <input type="checkbox"/> Palaeontology and archaeology |
| <input checked="" type="checkbox"/> | <input type="checkbox"/> Animals and other organisms   |
| <input checked="" type="checkbox"/> | <input type="checkbox"/> Human research participants   |
| <input checked="" type="checkbox"/> | <input type="checkbox"/> Clinical data                 |
| <input checked="" type="checkbox"/> | <input type="checkbox"/> Dual use research of concern  |

### Methods

| n/a                                 | Involvement in the study                        |
|-------------------------------------|-------------------------------------------------|
| <input checked="" type="checkbox"/> | <input type="checkbox"/> ChIP-seq               |
| <input checked="" type="checkbox"/> | <input type="checkbox"/> Flow cytometry         |
| <input checked="" type="checkbox"/> | <input type="checkbox"/> MRI-based neuroimaging |
